# Supplementary material for: GOing Bayesian: model-based gene set analysis of genome-scale data
Source: PubMed Central journal article supplement — Nucleic Acids Res. 2010 Feb 19;38(11):3523–32. doi: 10.1093/nar/gkq045 (PMC2887944; doi:10.1093/nar/gkq045), 2010-02-19
Supplement: gkq045_1.pdf [file gkq045_1.pdf]

# 1 Figure S1

We performed a further simulation study by subsampling 2,000 study sets at random each of which was chosen to have 90% of the genes of the yeast set that has been used in the Results section. We present the results in form of boxplots of the marginal probabilities reported for each term. The figure shows the ten terms that had the largest median. All terms identified by the original analysis were consistently identified also in the subsamples.

**Boxplot of 2000 subsampled (90%) study sets from yeast data set**

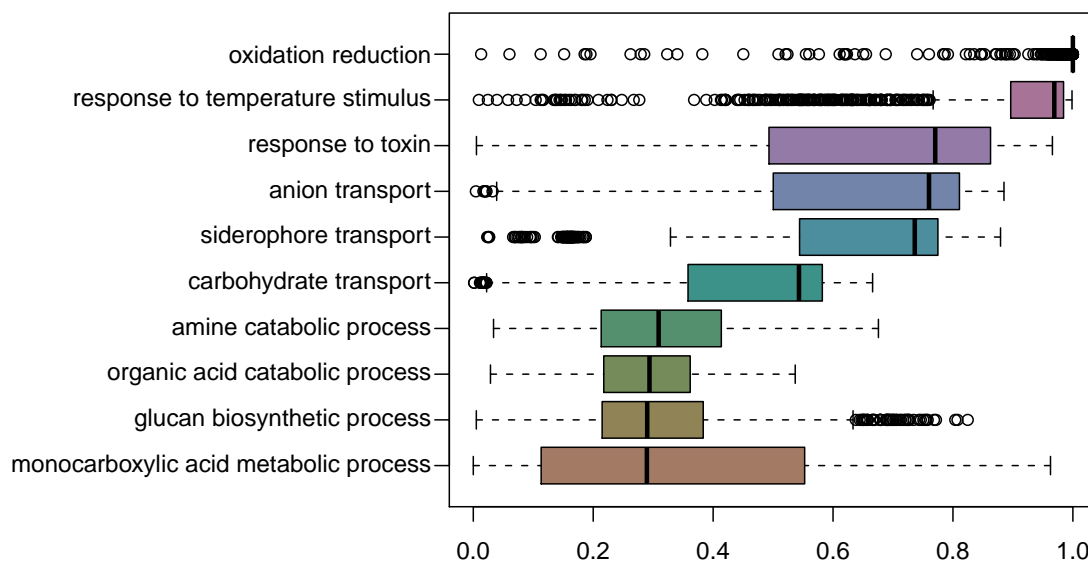

# 2 Table S1

| GO ID      | Name                                              | Pop | Study | MGSA              | TfT                                               | PCu                                               |
|------------|---------------------------------------------------|-----|-------|-------------------|---------------------------------------------------|---------------------------------------------------|
| GO:0055114 | oxidation reduction                               | 314 | 113   | 1.000/1.000/1.000 | $1.80 \times 10^{-41}$ ( $2.16 \times 10^{-38}$ ) | $3.15 \times 10^{-42}$ ( $3.67 \times 10^{-39}$ ) |
| GO:0009266 | response to temperature stimulus                  | 207 | 59    | 0.976/0.983/0.987 | $7.04 \times 10^{-16}$ ( $6.04 \times 10^{-14}$ ) | $1.32 \times 10^{-7}$ ( $6.71 \times 10^{-6}$ )   |
| GO:0009636 | response to toxin                                 | 22  | 8     | 0.832/0.846/0.870 | (0.006)                                           | 0.002 (0.027)                                     |
| GO:0015891 | siderophore transport                             | 6   | 4     | 0.814/0.826/0.840 | (0.010)                                           | 0.001 (0.020)                                     |
| GO:0006820 | anion transport                                   | 31  | 10    | 0.771/0.789/0.813 | (0.004)                                           | 0.568 (1.000)                                     |
| GO:0008643 | carbohydrate transport                            | 27  | 8     | 0.553/0.571/0.593 | 0.003 (0.021)                                     | 0.003 (0.039)                                     |
| GO:0032787 | monocarboxylic acid metabolic process             | 143 | 40    | 0.410/0.462/0.502 | $8.44 \times 10^{-11}$ ( $3.07 \times 10^{-9}$ )  | 0.016 (0.145)                                     |
| GO:0009250 | glucan biosynthetic process                       | 27  | 9     | 0.353/0.381/0.431 | (0.006)                                           | 0.012 (0.123)                                     |
| GO:0009310 | amine catabolic process                           | 42  | 17    | 0.358/0.372/0.396 | $7.01 \times 10^{-8}$ ( $1.96 \times 10^{-6}$ )   | (0.004)                                           |
| GO:0034637 | cellular carbohydrate biosynthetic process        | 83  | 20    | 0.301/0.343/0.381 | $5.53 \times 10^{-5}$ ()                          | $7.47 \times 10^{-5}$ (0.002)                     |
| GO:0051099 | positive regulation of binding                    | 3   | 2     | 0.315/0.326/0.337 | 0.025 (0.137)                                     | 0.014 (0.129)                                     |
| GO:0019794 | nonprotein amino acid metabolic process           | 10  | 5     | 0.279/0.291/0.304 | 0.001 (0.011)                                     | 0.020 (0.170)                                     |
| GO:0009084 | glutamine family amino acid biosynthetic process  | 28  | 14    | 0.279/0.288/0.302 | $3.94 \times 10^{-8}$ ( $1.13 \times 10^{-6}$ )   | (0.013)                                           |
| GO:0046395 | carboxylic acid catabolic process                 | 51  | 25    | 0.257/0.283/0.309 | $2.70 \times 10^{-13}$ ( $1.08 \times 10^{-11}$ ) | $2.69 \times 10^{-6}$ ()                          |
| GO:0016054 | organic acid catabolic process                    | 51  | 25    | 0.257/0.269/0.296 | $2.70 \times 10^{-13}$ ( $1.08 \times 10^{-11}$ ) | $2.89 \times 10^{-10}$ ( $1.98 \times 10^{-8}$ )  |
| GO:0031670 | cellular response to nutrient                     | 14  | 4     | 0.236/0.251/0.261 | 0.036 (0.186)                                     | 0.049 (0.313)                                     |
| GO:0045990 | regulation of transcription by carbon catabolites | 14  | 4     | 0.237/0.249/0.263 | 0.036 (0.186)                                     | 0.003 (0.039)                                     |
| GO:0016052 | carbohydrate catabolic process                    | 83  | 22    | 0.197/0.220/0.252 | $4.50 \times 10^{-6}$ ( $8.71 \times 10^{-5}$ )   | (0.013)                                           |

Continued on Next Page...

Table 1 – Continued

| GO ID      | Name                                                                              | Pop | Study | MGSA              | TfT                                               | PCu                                               |
|------------|-----------------------------------------------------------------------------------|-----|-------|-------------------|---------------------------------------------------|---------------------------------------------------|
| GO:0008645 | hexose transport                                                                  | 15  | 6     | 0.202/0.218/0.231 | 0.002 (0.014)                                     | 1.000 (1.000)                                     |
| GO:0015749 | monosaccharide transport                                                          | 15  | 6     | 0.202/0.218/0.238 | 0.002 (0.014)                                     | 0.186 (0.668)                                     |
| GO:0015711 | organic anion transport                                                           | 9   | 5     | 0.185/0.208/0.223 | (0.007)                                           | 0.090 (0.465)                                     |
| GO:0046898 | response to cycloheximide                                                         | 4   | 2     | 0.182/0.194/0.200 | 0.046 (0.221)                                     | 1.000 (1.000)                                     |
| GO:0014071 | response to cycloalkane                                                           | 4   | 2     | 0.175/0.189/0.197 | 0.046 (0.221)                                     | 0.600 (1.000)                                     |
| GO:0032048 | cardiolipin metabolic process                                                     | 5   | 2     | 0.179/0.189/0.205 | 0.072 (0.308)                                     | 0.476 (0.973)                                     |
| GO:0006857 | oligopeptide transport                                                            | 5   | 2     | 0.168/0.180/0.188 | 0.072 (0.308)                                     | 0.357 (0.902)                                     |
| GO:0000097 | sulfur amino acid biosynthetic process                                            | 35  | 6     | 0.166/0.177/0.182 | 0.104 (0.337)                                     | 0.712 (1.000)                                     |
| GO:0019751 | polyol metabolic process                                                          | 25  | 7     | 0.146/0.159/0.169 | 0.007 (0.048)                                     | 0.178 (0.654)                                     |
| GO:0006577 | betaine metabolic process                                                         | 3   | 3     | 0.142/0.153/0.168 | (0.008)                                           | 0.010 (0.101)                                     |
| GO:0009437 | carnitine metabolic process                                                       | 3   | 3     | 0.139/0.152/0.162 | (0.008)                                           | 0.014 (0.132)                                     |
| GO:0014070 | response to organic cyclic substance                                              | 5   | 2     | 0.132/0.137/0.142 | 0.072 (0.308)                                     | 0.031 (0.226)                                     |
| GO:0009086 | methionine biosynthetic process                                                   | 30  | 5     | 0.132/0.136/0.143 | 0.144 (0.434)                                     | 0.500 (0.973)                                     |
| GO:0009313 | oligosaccharide catabolic process                                                 | 5   | 2     | 0.125/0.131/0.140 | 0.072 (0.308)                                     | 0.329 (0.881)                                     |
| GO:0045333 | cellular respiration                                                              | 100 | 50    | 0.114/0.128/0.134 | $4.76 \times 10^{-26}$ ( $1.43 \times 10^{-23}$ ) | (0.017)                                           |
| GO:0009070 | serine family amino acid biosynthetic process                                     | 22  | 5     | 0.115/0.119/0.126 | 0.049 (0.231)                                     | 0.549 (1.000)                                     |
| GO:0046471 | phosphatidylglycerol metabolic process                                            | 7   | 2     | 0.105/0.110/0.115 | 0.134 (0.410)                                     | 0.061 (0.363)                                     |
| GO:0006526 | arginine biosynthetic process                                                     | 10  | 4     | 0.102/0.109/0.118 | 0.010 (0.068)                                     | 0.818 (1.000)                                     |
| GO:0006109 | regulation of carbohydrate metabolic process                                      | 38  | 11    | 0.100/0.107/0.114 | (0.005)                                           | (0.004)                                           |
| GO:0007584 | response to nutrient                                                              | 17  | 4     | 0.100/0.106/0.111 | 0.068 (0.304)                                     | 0.115 (0.531)                                     |
| GO:0019541 | propionate metabolic process                                                      | 5   | 5     | 0.089/0.103/0.112 | $7.10 \times 10^{-6}$ ()                          | 0.001 (0.026)                                     |
| GO:0000429 | regulation of transcription from RNA polymerase II promoter by carbon catabolites | 8   | 3     | 0.092/0.100/0.103 | 0.032 (0.173)                                     | 0.009 (0.097)                                     |
| GO:0006084 | acetyl-CoA metabolic process                                                      | 34  | 24    | 0.090/0.098/0.108 | $6.71 \times 10^{-18}$ ( $1.01 \times 10^{-15}$ ) | $3.25 \times 10^{-9}$ ( $1.80 \times 10^{-7}$ )   |
| GO:0046337 | phosphatidylethanolamine metabolic process                                        | 6   | 2     | 0.092/0.096/0.102 | 0.102 (0.332)                                     | 0.232 (0.745)                                     |
| GO:0051187 | cofactor catabolic process                                                        | 35  | 23    | 0.087/0.092/0.100 | $3.97 \times 10^{-16}$ ( $3.67 \times 10^{-14}$ ) | $3.17 \times 10^{-13}$ ( $3.00 \times 10^{-11}$ ) |
| GO:0009063 | cellular amino acid catabolic process                                             | 38  | 16    | 0.078/0.090/0.104 | $8.84 \times 10^{-8}$ ( $2.31 \times 10^{-6}$ )   | 0.001 (0.023)                                     |
| GO:0015806 | S-methylmethionine transport                                                      | 1   | 1     | 0.085/0.089/0.096 | 0.094 (0.319)                                     | 0.167 (0.642)                                     |
| GO:0019400 | alditol metabolic process                                                         | 14  | 5     | 0.074/0.083/0.091 | 0.007 (0.050)                                     | 0.141 (0.591)                                     |
| GO:0006071 | glycerol metabolic process                                                        | 14  | 5     | 0.072/0.082/0.091 | 0.007 (0.050)                                     | 1.000 (1.000)                                     |
| GO:0006817 | phosphate transport                                                               | 11  | 4     | 0.073/0.081/0.095 | 0.015 (0.092)                                     | 0.221 (0.726)                                     |
| GO:0010107 | potassium ion import                                                              | 1   | 1     | 0.077/0.081/0.086 | 0.094 (0.319)                                     | 0.125 (0.564)                                     |
| GO:0044275 | cellular carbohydrate catabolic process                                           | 60  | 17    | 0.073/0.079/0.084 | $2.14 \times 10^{-5}$ ()                          | (0.007)                                           |
| GO:0005984 | disaccharide metabolic process                                                    | 16  | 3     | 0.071/0.078/0.081 | 0.184 (0.478)                                     | 0.690 (1.000)                                     |
| GO:0006113 | fermentation                                                                      | 15  | 5     | 0.070/0.078/0.091 | 0.010 (0.065)                                     | 0.804 (1.000)                                     |
| GO:0006855 | multidrug transport                                                               | 10  | 3     | 0.071/0.077/0.080 | 0.060 (0.275)                                     | 0.264 (0.787)                                     |
| GO:0006564 | L-serine biosynthetic process                                                     | 4   | 2     | 0.073/0.076/0.080 | 0.046 (0.221)                                     | 0.179 (0.656)                                     |
| GO:0006878 | cellular copper ion homeostasis                                                   | 10  | 2     | 0.072/0.074/0.078 | 0.240 (0.594)                                     | 0.481 (0.973)                                     |
| GO:0055070 | copper ion homeostasis                                                            | 10  | 2     | 0.070/0.073/0.079 | 0.240 (0.594)                                     | 0.481 (0.973)                                     |
| GO:0046677 | response to antibiotic                                                            | 8   | 2     | 0.066/0.071/0.075 | 0.168 (0.469)                                     | 0.230 (0.745)                                     |
| GO:0000040 | low-affinity iron ion transport                                                   | 1   | 1     | 0.065/0.070/0.074 | 0.094 (0.319)                                     | 0.400 (0.939)                                     |
| GO:0009061 | anaerobic respiration                                                             | 2   | 2     | 0.065/0.070/0.073 | 0.009 (0.060)                                     | 0.247 (0.764)                                     |
| GO:0046173 | polyol biosynthetic process                                                       | 9   | 3     | 0.061/0.070/0.075 | 0.045 (0.221)                                     | 0.245 (0.757)                                     |
| GO:0006072 | glycerol-3-phosphate metabolic process                                            | 4   | 3     | 0.063/0.067/0.074 | 0.003 (0.025)                                     | 0.011 (0.109)                                     |
| GO:0006433 | prolyl-tRNA aminoacylation                                                        | 2   | 1     | 0.062/0.067/0.071 | 0.179 (0.469)                                     | 0.054 (0.338)                                     |
| GO:0015833 | peptide transport                                                                 | 8   | 2     | 0.063/0.067/0.071 | 0.168 (0.469)                                     | 0.174 (0.654)                                     |
| GO:0042149 | cellular response to glucose starvation                                           | 4   | 1     | 0.063/0.065/0.068 | 0.326 (0.655)                                     | 0.418 (0.953)                                     |

Continued on Next Page...

Table 1 – Continued

| GO ID      | Name                                                                                        | Pop | Study | MGSA              | TfT                           | PCu           |
|------------|---------------------------------------------------------------------------------------------|-----|-------|-------------------|-------------------------------|---------------|
| GO:0060962 | regulation of ribosomal protein gene transcription from RNA polymerase II promoter          | 2   | 1     | 0.059/0.064/0.067 | 0.179 (0.469)                 | 0.080 (0.421) |
| GO:0010688 | negative regulation of ribosomal protein gene transcription from RNA polymerase II promoter | 2   | 1     | 0.060/0.063/0.067 | 0.179 (0.469)                 | 0.182 (0.659) |
| GO:0032092 | positive regulation of protein binding                                                      | 1   | 1     | 0.059/0.062/0.067 | 0.094 (0.319)                 | 0.500 (0.973) |
| GO:0034440 | lipid oxidation                                                                             | 11  | 6     | 0.056/0.062/0.068 | (0.002)                       | 0.015 (0.134) |
| GO:0006591 | ornithine metabolic process                                                                 | 7   | 4     | 0.058/0.061/0.067 | 0.002 (0.018)                 | 0.500 (0.973) |
| GO:0043388 | positive regulation of DNA binding                                                          | 2   | 1     | 0.057/0.061/0.064 | 0.179 (0.469)                 | 0.533 (0.996) |
| GO:0000413 | protein peptidyl-prolyl isomerization                                                       | 1   | 1     | 0.055/0.060/0.064 | 0.094 (0.319)                 | 0.028 (0.213) |
| GO:0019395 | fatty acid oxidation                                                                        | 11  | 6     | 0.055/0.060/0.064 | (0.002)                       | 0.010 (0.109) |
| GO:0034397 | telomere localization                                                                       | 2   | 1     | 0.055/0.060/0.063 | 0.179 (0.469)                 | 0.052 (0.329) |
| GO:0042407 | cristae formation                                                                           | 4   | 4     | 0.056/0.060/0.065 | $7.64 \times 10^{-5}$ (0.001) | (0.016)       |
| GO:0045141 | meiotic telomere clustering                                                                 | 2   | 1     | 0.056/0.060/0.064 | 0.179 (0.469)                 | 0.035 (0.246) |
| GO:0051101 | regulation of DNA binding                                                                   | 9   | 2     | 0.056/0.060/0.063 | 0.204 (0.515)                 | 0.345 (0.893) |
| GO:0000414 | regulation of histone H3-K36 methylation                                                    | 1   | 1     | 0.056/0.059/0.062 | 0.094 (0.319)                 | 0.333 (0.883) |
| GO:0000415 | negative regulation of histone H3-K36 methylation                                           | 1   | 1     | 0.056/0.059/0.062 | 0.094 (0.319)                 | 1.000 (1.000) |
| GO:0031061 | negative regulation of histone methylation                                                  | 1   | 1     | 0.056/0.059/0.065 | 0.094 (0.319)                 | 0.043 (0.289) |
| GO:0006114 | glycerol biosynthetic process                                                               | 3   | 2     | 0.054/0.058/0.063 | 0.025 (0.137)                 | 0.215 (0.723) |
| GO:0010452 | histone H3-K36 methylation                                                                  | 1   | 1     | 0.056/0.058/0.063 | 0.094 (0.319)                 | 0.067 (0.377) |
| GO:0031057 | negative regulation of histone modification                                                 | 1   | 1     | 0.055/0.058/0.061 | 0.094 (0.319)                 | 0.028 (0.213) |
| GO:0033015 | tetrapyrrole catabolic process                                                              | 1   | 1     | 0.051/0.058/0.060 | 0.094 (0.319)                 | 0.269 (0.793) |
| GO:0042167 | heme catabolic process                                                                      | 1   | 1     | 0.055/0.058/0.060 | 0.094 (0.319)                 | 0.235 (0.746) |
| GO:0000412 | histone peptidyl-prolyl isomerization                                                       | 1   | 1     | 0.054/0.057/0.060 | 0.094 (0.319)                 | 0.030 (0.223) |
| GO:0006787 | porphyrin catabolic process                                                                 | 1   | 1     | 0.054/0.057/0.060 | 0.094 (0.319)                 | 0.510 (0.976) |
| GO:0006788 | heme oxidation                                                                              | 1   | 1     | 0.055/0.057/0.061 | 0.094 (0.319)                 | 0.235 (0.746) |
| GO:0006829 | zinc ion transport                                                                          | 9   | 2     | 0.054/0.057/0.061 | 0.204 (0.515)                 | 0.492 (0.973) |
| GO:0019401 | alditol biosynthetic process                                                                | 3   | 2     | 0.052/0.057/0.064 | 0.025 (0.137)                 | 0.142 (0.592) |
| GO:0033692 | cellular polysaccharide biosynthetic process                                                | 43  | 10    | 0.054/0.057/0.064 | 0.005 (0.040)                 | 0.002 (0.027) |
| GO:0046149 | pigment catabolic process                                                                   | 1   | 1     | 0.053/0.057/0.060 | 0.094 (0.319)                 | 0.129 (0.567) |
| GO:0015695 | organic cation transport                                                                    | 8   | 3     | 0.051/0.056/0.063 | 0.032 (0.173)                 | 0.308 (0.848) |
| GO:0046365 | monosaccharide catabolic process                                                            | 66  | 16    | 0.052/0.056/0.060 | (0.003)                       | 0.406 (0.950) |
| GO:0006825 | copper ion transport                                                                        | 14  | 3     | 0.050/0.054/0.058 | 0.137 (0.415)                 | 0.457 (0.967) |
| GO:0005998 | xylulose catabolic process                                                                  | 1   | 1     | 0.047/0.053/0.057 | 0.094 (0.319)                 | 0.500 (0.973) |
| GO:0006000 | fructose metabolic process                                                                  | 6   | 3     | 0.048/0.053/0.058 | 0.013 (0.083)                 | 0.148 (0.604) |
| GO:0006003 | fructose 2,6-bisphosphate metabolic process                                                 | 4   | 3     | 0.047/0.053/0.057 | 0.003 (0.025)                 | 0.200 (0.699) |
| GO:0019323 | pentose catabolic process                                                                   | 5   | 2     | 0.049/0.053/0.057 | 0.072 (0.308)                 | 0.323 (0.873) |
| GO:0046164 | alcohol catabolic process                                                                   | 70  | 17    | 0.049/0.053/0.056 | (0.002)                       | 0.007 (0.081) |
| GO:0006007 | glucose catabolic process                                                                   | 53  | 13    | 0.049/0.052/0.056 | (0.009)                       | 0.564 (1.000) |
| GO:0009311 | oligosaccharide metabolic process                                                           | 23  | 4     | 0.049/0.052/0.057 | 0.163 (0.469)                 | 0.726 (1.000) |
| GO:0042732 | D-xylose metabolic process                                                                  | 6   | 3     | 0.047/0.052/0.057 | 0.013 (0.083)                 | 0.176 (0.654) |
| GO:0042762 | regulation of sulfur metabolic process                                                      | 1   | 1     | 0.047/0.052/0.055 | 0.094 (0.319)                 | 0.060 (0.360) |
| GO:0043392 | negative regulation of DNA binding                                                          | 3   | 1     | 0.050/0.052/0.055 | 0.256 (0.594)                 | 0.533 (0.996) |
| GO:0043433 | negative regulation of transcription factor activity                                        | 3   | 1     | 0.050/0.052/0.055 | 0.256 (0.594)                 | 0.375 (0.917) |
| GO:0090048 | negative regulation of transcription regulator activity                                     | 3   | 1     | 0.048/0.052/0.056 | 0.256 (0.594)                 | 0.371 (0.917) |

Continued on Next Page...

Table 1 – Continued

| GO ID      | Name                                                                        | Pop | Study | MGSA              | TfT                                               | PCu           |
|------------|-----------------------------------------------------------------------------|-----|-------|-------------------|---------------------------------------------------|---------------|
| GO:0005997 | xylulose metabolic process                                                  | 2   | 2     | 0.048/0.051/0.055 | 0.009 (0.060)                                     | 0.065 (0.374) |
| GO:0010906 | regulation of glucose metabolic process                                     | 21  | 7     | 0.044/0.051/0.057 | 0.002 (0.019)                                     | 0.225 (0.733) |
| GO:0015677 | copper ion import                                                           | 6   | 2     | 0.047/0.051/0.055 | 0.102 (0.332)                                     | 0.743 (1.000) |
| GO:0006826 | iron ion transport                                                          | 29  | 7     | 0.045/0.050/0.057 | 0.015 (0.095)                                     | 0.065 (0.374) |
| GO:0006560 | proline metabolic process                                                   | 8   | 4     | 0.045/0.049/0.052 | 0.004 (0.031)                                     | 0.051 (0.323) |
| GO:0015718 | monocarboxylic acid transport                                               | 15  | 4     | 0.046/0.049/0.054 | 0.045 (0.221)                                     | 0.219 (0.723) |
| GO:0006561 | proline biosynthetic process                                                | 5   | 2     | 0.045/0.048/0.051 | 0.072 (0.308)                                     | 0.460 (0.967) |
| GO:0009069 | serine family amino acid metabolic process                                  | 34  | 6     | 0.044/0.048/0.050 | 0.093 (0.319)                                     | 0.622 (1.000) |
| GO:0016036 | cellular response to phosphate starvation                                   | 3   | 1     | 0.044/0.048/0.051 | 0.256 (0.594)                                     | 0.330 (0.881) |
| GO:0051274 | beta-glucan biosynthetic process                                            | 10  | 3     | 0.043/0.048/0.054 | 0.060 (0.275)                                     | 0.722 (1.000) |
| GO:0000023 | maltose metabolic process                                                   | 4   | 1     | 0.045/0.047/0.052 | 0.326 (0.655)                                     | 0.607 (1.000) |
| GO:0015879 | carnitine transport                                                         | 1   | 1     | 0.041/0.047/0.050 | 0.094 (0.319)                                     | 0.051 (0.325) |
| GO:0015698 | inorganic anion transport                                                   | 20  | 5     | 0.042/0.046/0.051 | 0.034 (0.180)                                     | 0.940 (1.000) |
| GO:0006006 | glucose metabolic process                                                   | 87  | 22    | 0.039/0.045/0.048 | $1.03 \times 10^{-5}$ ()                          | 0.371 (0.917) |
| GO:0006598 | polyamine catabolic process                                                 | 4   | 1     | 0.041/0.045/0.047 | 0.326 (0.655)                                     | 0.637 (1.000) |
| GO:0006824 | cobalt ion transport                                                        | 3   | 1     | 0.041/0.045/0.049 | 0.256 (0.594)                                     | 0.397 (0.938) |
| GO:0042402 | biogenic amine catabolic process                                            | 11  | 3     | 0.041/0.045/0.048 | 0.076 (0.314)                                     | 0.688 (1.000) |
| GO:0043393 | regulation of protein binding                                               | 2   | 1     | 0.043/0.045/0.049 | 0.179 (0.469)                                     | 0.253 (0.767) |
| GO:0050983 | spermidine catabolic process to deoxyhypusine, using deoxyhypusine synthase | 1   | 1     | 0.040/0.045/0.049 | 0.094 (0.319)                                     | 1.000 (1.000) |
| GO:0006099 | tricarboxylic acid cycle                                                    | 30  | 22    | 0.038/0.044/0.047 | $4.44 \times 10^{-17}$ ( $5.34 \times 10^{-15}$ ) | (0.006)       |
| GO:0009051 | pentose-phosphate shunt, oxidative branch                                   | 4   | 2     | 0.040/0.044/0.049 | 0.046 (0.221)                                     | 0.269 (0.793) |
| GO:0046203 | spermidine catabolic process                                                | 1   | 1     | 0.040/0.044/0.047 | 0.094 (0.319)                                     | 0.167 (0.642) |
| GO:0006097 | glyoxylate cycle                                                            | 8   | 5     | 0.037/0.043/0.049 | (0.004)                                           | 0.012 (0.123) |
| GO:0015980 | energy derivation by oxidation of organic compounds                         | 156 | 63    | 0.036/0.043/0.052 | $4.32 \times 10^{-26}$ ( $1.43 \times 10^{-23}$ ) | 0.053 (0.332) |
| GO:0046356 | acetyl-CoA catabolic process                                                | 30  | 22    | 0.040/0.043/0.052 | $4.44 \times 10^{-17}$ ( $5.34 \times 10^{-15}$ ) | 0.019 (0.161) |
| GO:0046487 | glyoxylate metabolic process                                                | 9   | 6     | 0.037/0.043/0.050 | $4.32 \times 10^{-5}$ ()                          | 0.012 (0.119) |
| GO:0000271 | polysaccharide biosynthetic process                                         | 44  | 10    | 0.035/0.042/0.048 | 0.006 (0.047)                                     | 0.002 (0.033) |
| GO:0009092 | homoserine metabolic process                                                | 10  | 2     | 0.041/0.042/0.047 | 0.240 (0.594)                                     | 0.584 (1.000) |
| GO:0010675 | regulation of cellular carbohydrate metabolic process                       | 31  | 9     | 0.035/0.042/0.045 | 0.002 (0.014)                                     | (0.013)       |
| GO:0019343 | cysteine biosynthetic process via cystathionine                             | 2   | 1     | 0.039/0.042/0.045 | 0.179 (0.469)                                     | 0.318 (0.867) |
| GO:0031400 | negative regulation of protein modification process                         | 2   | 1     | 0.040/0.042/0.044 | 0.179 (0.469)                                     | 0.066 (0.374) |
| GO:0015908 | fatty acid transport                                                        | 4   | 1     | 0.038/0.041/0.043 | 0.326 (0.655)                                     | 0.347 (0.893) |
| GO:0019344 | cysteine biosynthetic process                                               | 12  | 2     | 0.039/0.041/0.044 | 0.312 (0.655)                                     | 0.782 (1.000) |
| GO:0031167 | rRNA methylation                                                            | 10  | 2     | 0.039/0.041/0.044 | 0.240 (0.594)                                     | 0.130 (0.567) |
| GO:0046838 | phosphorylated carbohydrate dephosphorylation                               | 3   | 1     | 0.039/0.041/0.044 | 0.256 (0.594)                                     | 0.459 (0.967) |
| GO:0046855 | inositol phosphate dephosphorylation                                        | 3   | 1     | 0.038/0.041/0.043 | 0.256 (0.594)                                     | 0.491 (0.973) |
| GO:0015893 | drug transport                                                              | 17  | 4     | 0.037/0.040/0.044 | 0.068 (0.304)                                     | 0.071 (0.393) |
| GO:0051100 | negative regulation of binding                                              | 4   | 1     | 0.036/0.039/0.041 | 0.326 (0.655)                                     | 0.464 (0.967) |
| GO:0005978 | glycogen biosynthetic process                                               | 18  | 6     | 0.035/0.038/0.044 | 0.005 (0.035)                                     | 0.231 (0.745) |
| GO:0019654 | acetate fermentation                                                        | 1   | 1     | 0.035/0.038/0.041 | 0.094 (0.319)                                     | 0.350 (0.893) |
| GO:0006094 | gluconeogenesis                                                             | 31  | 8     | 0.033/0.037/0.042 | 0.006 (0.047)                                     | 0.497 (0.973) |
| GO:0046835 | carbohydrate phosphorylation                                                | 2   | 1     | 0.034/0.037/0.040 | 0.179 (0.469)                                     | 0.351 (0.893) |

Continued on Next Page...

Table 1 – Continued

| GO ID      | Name                                                                                                | Pop | Study | MGSA              | TfT                       | PCu           |
|------------|-----------------------------------------------------------------------------------------------------|-----|-------|-------------------|---------------------------|---------------|
| GO:0006110 | regulation of glycolysis                                                                            | 6   | 3     | 0.033/0.036/0.038 | 0.013 (0.083)             | 0.125 (0.564) |
| GO:0043471 | regulation of cellular carbohydrate catabolic process                                               | 8   | 4     | 0.034/0.036/0.038 | 0.004 (0.031)             | (0.017)       |
| GO:0051273 | beta-glucan metabolic process                                                                       | 11  | 3     | 0.031/0.036/0.038 | 0.076 (0.314)             | 0.504 (0.974) |
| GO:0000296 | spermine transport                                                                                  | 4   | 1     | 0.033/0.035/0.038 | 0.326 (0.655)             | 0.576 (1.000) |
| GO:0005993 | trehalose catabolic process                                                                         | 3   | 1     | 0.032/0.035/0.038 | 0.256 (0.594)             | 0.455 (0.967) |
| GO:0030259 | lipid glycosylation                                                                                 | 3   | 1     | 0.031/0.035/0.037 | 0.256 (0.594)             | 0.621 (1.000) |
| GO:0043470 | regulation of carbohydrate catabolic process                                                        | 8   | 4     | 0.033/0.035/0.037 | 0.004 (0.031)             | 0.057 (0.348) |
| GO:0000052 | citrulline metabolic process                                                                        | 1   | 1     | 0.032/0.034/0.037 | 0.094 (0.319)             | 0.213 (0.723) |
| GO:0000053 | argininosuccinate metabolic process                                                                 | 1   | 1     | 0.032/0.034/0.038 | 0.094 (0.319)             | 0.500 (0.973) |
| GO:0000461 | endonucleolytic cleavage to generate mature 3'-end of SSU-rRNA from (SSU-rRNA, 5.8S rRNA, LSU-rRNA) | 4   | 1     | 0.034/0.034/0.038 | 0.326 (0.655)             | 0.108 (0.517) |
| GO:0006098 | pentose-phosphate shunt                                                                             | 14  | 4     | 0.031/0.034/0.036 | 0.036 (0.186)             | 0.590 (1.000) |
| GO:0009098 | leucine biosynthetic process                                                                        | 5   | 1     | 0.030/0.034/0.035 | 0.389 (0.747)             | 0.872 (1.000) |
| GO:0015697 | quatarnary ammonium group transport                                                                 | 2   | 1     | 0.030/0.034/0.038 | 0.179 (0.469)             | 0.255 (0.768) |
| GO:0016559 | peroxisome fission                                                                                  | 2   | 1     | 0.030/0.034/0.037 | 0.179 (0.469)             | 0.064 (0.373) |
| GO:0046513 | ceramide biosynthetic process                                                                       | 4   | 1     | 0.032/0.034/0.036 | 0.326 (0.655)             | 0.308 (0.848) |
| GO:0046520 | sphingoid biosynthetic process                                                                      | 4   | 1     | 0.031/0.034/0.036 | 0.326 (0.655)             | 0.154 (0.618) |
| GO:0006551 | leucine metabolic process                                                                           | 8   | 3     | 0.032/0.033/0.037 | 0.032 (0.173)             | 0.334 (0.883) |
| GO:0010921 | regulation of phosphatase activity                                                                  | 4   | 1     | 0.031/0.033/0.036 | 0.326 (0.655)             | 0.399 (0.938) |
| GO:0015793 | glycerol transport                                                                                  | 4   | 1     | 0.030/0.033/0.035 | 0.326 (0.655)             | 0.748 (1.000) |
| GO:0015838 | betaine transport                                                                                   | 2   | 1     | 0.032/0.033/0.035 | 0.179 (0.469)             | 1.000 (1.000) |
| GO:0016337 | cell-cell adhesion                                                                                  | 4   | 1     | 0.029/0.033/0.035 | 0.326 (0.655)             | 0.786 (1.000) |
| GO:0019318 | hexose metabolic process                                                                            | 104 | 25    | 0.026/0.033/0.037 | $6.88 \times 10^{-6}$ ( ) | 0.165 (0.642) |
| GO:0033214 | iron assimilation by chelation and transport                                                        | 4   | 2     | 0.029/0.033/0.036 | 0.046 (0.221)             | 0.800 (1.000) |
| GO:0035303 | regulation of dephosphorylation                                                                     | 4   | 1     | 0.031/0.033/0.035 | 0.326 (0.655)             | 0.129 (0.567) |
| GO:0043666 | regulation of phosphoprotein phosphatase activity                                                   | 4   | 1     | 0.031/0.033/0.035 | 0.326 (0.655)             | 1.000 (1.000) |
| GO:0000752 | agglutination involved in conjugation with cellular fusion                                          | 4   | 1     | 0.031/0.032/0.035 | 0.326 (0.655)             | 0.239 (0.748) |
| GO:0000771 | agglutination involved in conjugation                                                               | 4   | 1     | 0.030/0.032/0.035 | 0.326 (0.655)             | 0.140 (0.586) |
| GO:0006525 | arginine metabolic process                                                                          | 16  | 6     | 0.031/0.032/0.038 | 0.002 (0.020)             | 0.522 (0.986) |
| GO:0006646 | phosphatidylethanolamine biosynthetic process                                                       | 4   | 1     | 0.029/0.032/0.034 | 0.326 (0.655)             | 0.276 (0.804) |
| GO:0007157 | heterophilic cell adhesion                                                                          | 4   | 1     | 0.030/0.032/0.034 | 0.326 (0.655)             | 1.000 (1.000) |
| GO:0008612 | peptidyl-lysine modification to hypusine                                                            | 3   | 1     | 0.030/0.032/0.035 | 0.256 (0.594)             | 0.300 (0.839) |
| GO:0015892 | siderophore-iron transport                                                                          | 4   | 2     | 0.028/0.032/0.035 | 0.046 (0.221)             | 0.238 (0.748) |
| GO:0045014 | negative regulation of transcription by glucose                                                     | 6   | 2     | 0.029/0.032/0.033 | 0.102 (0.332)             | 0.417 (0.953) |
| GO:0046516 | hypusine metabolic process                                                                          | 3   | 1     | 0.030/0.032/0.035 | 0.256 (0.594)             | 0.447 (0.967) |
| GO:0000433 | negative regulation of transcription from RNA polymerase II promoter by glucose                     | 6   | 2     | 0.029/0.031/0.033 | 0.102 (0.332)             | 0.714 (1.000) |
| GO:0000436 | positive regulation of transcription from RNA polymerase II promoter by carbon catabolites          | 2   | 1     | 0.028/0.031/0.033 | 0.179 (0.469)             | 0.146 (0.600) |
| GO:0000437 | negative regulation of transcription from RNA polymerase II promoter by carbon catabolites          | 6   | 2     | 0.029/0.031/0.033 | 0.102 (0.332)             | 0.070 (0.389) |
| GO:0006081 | cellular aldehyde metabolic process                                                                 | 22  | 8     | 0.027/0.031/0.036 | (0.006)                   | (0.013)       |

Continued on Next Page...

Table 1 – Continued

| GO ID      | Name                                                                   | Pop | Study | MGSA              | TfT                                               | PCu                                               |
|------------|------------------------------------------------------------------------|-----|-------|-------------------|---------------------------------------------------|---------------------------------------------------|
| GO:0010520 | regulation of reciprocal meiotic recombination                         | 4   | 1     | 0.029/0.031/0.033 | 0.326 (0.655)                                     | 0.217 (0.723)                                     |
| GO:0019320 | hexose catabolic process                                               | 59  | 14    | 0.028/0.031/0.033 | (0.008)                                           | 0.648 (1.000)                                     |
| GO:0045013 | negative regulation of transcription by carbon catabolites             | 7   | 2     | 0.029/0.031/0.034 | 0.134 (0.410)                                     | 0.030 (0.223)                                     |
| GO:0046335 | ethanolamine biosynthetic process                                      | 4   | 1     | 0.029/0.031/0.034 | 0.326 (0.655)                                     | 0.286 (0.813)                                     |
| GO:0060631 | regulation of meiosis I                                                | 4   | 1     | 0.029/0.031/0.032 | 0.326 (0.655)                                     | 0.138 (0.581)                                     |
| GO:0005991 | trehalose metabolic process                                            | 11  | 2     | 0.028/0.030/0.032 | 0.276 (0.628)                                     | 0.786 (1.000)                                     |
| GO:0031060 | regulation of histone methylation                                      | 3   | 1     | 0.029/0.030/0.032 | 0.256 (0.594)                                     | 0.115 (0.531)                                     |
| GO:0032973 | amino acid export                                                      | 4   | 1     | 0.028/0.030/0.033 | 0.326 (0.655)                                     | 0.387 (0.932)                                     |
| GO:0051131 | chaperone-mediated protein complex assembly                            | 5   | 1     | 0.027/0.029/0.032 | 0.389 (0.747)                                     | 0.215 (0.723)                                     |
| GO:0006083 | acetate metabolic process                                              | 6   | 3     | 0.026/0.028/0.030 | 0.013 (0.083)                                     | 0.215 (0.723)                                     |
| GO:0006498 | N-terminal protein lipidation                                          | 5   | 1     | 0.026/0.028/0.031 | 0.389 (0.747)                                     | 0.158 (0.630)                                     |
| GO:0006499 | N-terminal protein myristoylation                                      | 5   | 1     | 0.026/0.028/0.031 | 0.389 (0.747)                                     | 1.000 (1.000)                                     |
| GO:0006778 | porphyrin metabolic process                                            | 17  | 4     | 0.027/0.028/0.031 | 0.068 (0.304)                                     | 0.766 (1.000)                                     |
| GO:0016139 | glycoside catabolic process                                            | 4   | 1     | 0.026/0.028/0.029 | 0.326 (0.655)                                     | 0.717 (1.000)                                     |
| GO:0018319 | protein amino acid myristoylation                                      | 5   | 1     | 0.026/0.028/0.031 | 0.389 (0.747)                                     | 1.000 (1.000)                                     |
| GO:0018377 | protein myristoylation                                                 | 5   | 1     | 0.026/0.028/0.030 | 0.389 (0.747)                                     | 0.178 (0.654)                                     |
| GO:0019346 | transsulfuration                                                       | 4   | 1     | 0.025/0.028/0.029 | 0.326 (0.655)                                     | 0.453 (0.967)                                     |
| GO:0019509 | methionine salvage                                                     | 5   | 1     | 0.026/0.028/0.029 | 0.389 (0.747)                                     | 0.577 (1.000)                                     |
| GO:0033013 | tetrapyrrole metabolic process                                         | 17  | 4     | 0.025/0.028/0.030 | 0.068 (0.304)                                     | 0.042 (0.284)                                     |
| GO:0034605 | cellular response to heat                                              | 173 | 51    | 0.023/0.028/0.037 | $1.73 \times 10^{-14}$ ( $1.04 \times 10^{-12}$ ) | $6.19 \times 10^{-19}$ ( $1.44 \times 10^{-16}$ ) |
| GO:0042168 | heme metabolic process                                                 | 17  | 4     | 0.027/0.028/0.030 | 0.068 (0.304)                                     | 0.159 (0.630)                                     |
| GO:0043102 | amino acid salvage                                                     | 5   | 1     | 0.026/0.028/0.031 | 0.389 (0.747)                                     | 0.570 (1.000)                                     |
| GO:0046352 | disaccharide catabolic process                                         | 4   | 1     | 0.026/0.028/0.030 | 0.326 (0.655)                                     | 0.731 (1.000)                                     |
| GO:0006563 | L-serine metabolic process                                             | 9   | 2     | 0.026/0.027/0.030 | 0.204 (0.515)                                     | 0.513 (0.976)                                     |
| GO:0006631 | fatty acid metabolic process                                           | 58  | 13    | 0.024/0.027/0.031 | 0.002 (0.019)                                     | 0.068 (0.381)                                     |
| GO:0015680 | intracellular copper ion transport                                     | 4   | 1     | 0.025/0.027/0.029 | 0.326 (0.655)                                     | 0.142 (0.592)                                     |
| GO:0034755 | iron ion transmembrane transport                                       | 5   | 2     | 0.025/0.027/0.030 | 0.072 (0.308)                                     | 0.578 (1.000)                                     |
| GO:0000430 | regulation of transcription from RNA polymerase II promoter by glucose | 7   | 2     | 0.024/0.026/0.028 | 0.134 (0.410)                                     | 0.917 (1.000)                                     |
| GO:0006020 | inositol metabolic process                                             | 11  | 2     | 0.025/0.026/0.028 | 0.276 (0.628)                                     | 0.924 (1.000)                                     |
| GO:0006835 | dicarboxylic acid transport                                            | 3   | 2     | 0.024/0.026/0.030 | 0.025 (0.137)                                     | 0.072 (0.394)                                     |
| GO:0008655 | pyrimidine salvage                                                     | 5   | 1     | 0.023/0.026/0.027 | 0.389 (0.747)                                     | 0.199 (0.699)                                     |
| GO:0015696 | ammonium transport                                                     | 6   | 2     | 0.025/0.026/0.027 | 0.102 (0.332)                                     | 0.893 (1.000)                                     |
| GO:0015729 | oxaloacetate transport                                                 | 1   | 1     | 0.023/0.026/0.028 | 0.094 (0.319)                                     | 0.667 (1.000)                                     |
| GO:0034207 | steroid acetylation                                                    | 1   | 1     | 0.024/0.026/0.028 | 0.094 (0.319)                                     | 0.130 (0.567)                                     |
| GO:0034209 | sterol acetylation                                                     | 1   | 1     | 0.024/0.026/0.028 | 0.094 (0.319)                                     | 0.064 (0.373)                                     |
| GO:0034659 | isopropylmalate transport                                              | 1   | 1     | 0.024/0.026/0.029 | 0.094 (0.319)                                     | 0.667 (1.000)                                     |
| GO:0043467 | regulation of generation of precursor metabolites and energy           | 14  | 4     | 0.023/0.026/0.028 | 0.036 (0.186)                                     | 0.065 (0.374)                                     |
| GO:0046015 | regulation of transcription by glucose                                 | 8   | 2     | 0.025/0.026/0.028 | 0.168 (0.469)                                     | 0.825 (1.000)                                     |
| GO:0006627 | mitochondrial protein processing during import                         | 5   | 1     | 0.023/0.025/0.027 | 0.389 (0.747)                                     | 0.188 (0.670)                                     |
| GO:0010992 | ubiquitin homeostasis                                                  | 5   | 1     | 0.023/0.025/0.027 | 0.389 (0.747)                                     | 0.462 (0.967)                                     |
| GO:0010993 | regulation of ubiquitin homeostasis                                    | 5   | 1     | 0.024/0.025/0.026 | 0.389 (0.747)                                     | 0.242 (0.756)                                     |
| GO:0015780 | nucleotide-sugar transport                                             | 4   | 1     | 0.023/0.025/0.027 | 0.326 (0.655)                                     | 0.779 (1.000)                                     |
| GO:0034982 | mitochondrial protein processing                                       | 5   | 1     | 0.023/0.025/0.027 | 0.389 (0.747)                                     | 0.345 (0.893)                                     |
| GO:0000409 | regulation of transcription by galactose                               | 4   | 1     | 0.023/0.024/0.026 | 0.326 (0.655)                                     | 0.790 (1.000)                                     |
| GO:0000411 | positive regulation of transcription by galactose                      | 4   | 1     | 0.023/0.024/0.027 | 0.326 (0.655)                                     | 0.800 (1.000)                                     |

Continued on Next Page...

Table 1 – Continued

| GO ID      | Name                                                                       | Pop | Study | MGSA              | TfT                                               | PCu                                               |
|------------|----------------------------------------------------------------------------|-----|-------|-------------------|---------------------------------------------------|---------------------------------------------------|
| GO:0006013 | mannose metabolic process                                                  | 7   | 2     | 0.022/0.024/0.026 | 0.134 (0.410)                                     | 0.536 (1.000)                                     |
| GO:0006090 | pyruvate metabolic process                                                 | 42  | 10    | 0.021/0.024/0.027 | 0.004 (0.034)                                     | 0.821 (1.000)                                     |
| GO:0009109 | coenzyme catabolic process                                                 | 34  | 22    | 0.020/0.024/0.026 | $2.91 \times 10^{-15}$ ( $1.94 \times 10^{-13}$ ) | $5.72 \times 10^{-7}$ ( $2.56 \times 10^{-5}$ )   |
| GO:0033212 | iron assimilation                                                          | 6   | 3     | 0.021/0.024/0.027 | 0.013 (0.083)                                     | 0.014 (0.132)                                     |
| GO:0006037 | cell wall chitin metabolic process                                         | 15  | 1     | 0.021/0.023/0.026 | 0.772 (1.000)                                     | 0.889 (1.000)                                     |
| GO:0006580 | ethanolamine metabolic process                                             | 5   | 1     | 0.022/0.023/0.025 | 0.389 (0.747)                                     | 0.604 (1.000)                                     |
| GO:0006592 | ornithine biosynthetic process                                             | 4   | 2     | 0.021/0.023/0.024 | 0.046 (0.221)                                     | 0.643 (1.000)                                     |
| GO:0006740 | NADPH regeneration                                                         | 19  | 6     | 0.021/0.023/0.025 | 0.006 (0.046)                                     | 0.648 (1.000)                                     |
| GO:0016137 | glycoside metabolic process                                                | 12  | 2     | 0.021/0.023/0.026 | 0.312 (0.655)                                     | 0.758 (1.000)                                     |
| GO:0050667 | homocysteine metabolic process                                             | 6   | 1     | 0.022/0.023/0.024 | 0.446 (0.821)                                     | 0.643 (1.000)                                     |
| GO:0008216 | spermidine metabolic process                                               | 3   | 1     | 0.020/0.022/0.024 | 0.256 (0.594)                                     | 0.375 (0.917)                                     |
| GO:0009065 | glutamine family amino acid catabolic process                              | 10  | 8     | 0.020/0.022/0.025 | $2.15 \times 10^{-7}$ ( $5.37 \times 10^{-6}$ )   | 0.002 (0.029)                                     |
| GO:0019795 | nonprotein amino acid biosynthetic process                                 | 6   | 2     | 0.021/0.022/0.024 | 0.102 (0.332)                                     | 0.436 (0.963)                                     |
| GO:0031647 | regulation of protein stability                                            | 9   | 2     | 0.019/0.022/0.023 | 0.204 (0.515)                                     | 0.123 (0.562)                                     |
| GO:0045722 | positive regulation of gluconeogenesis                                     | 5   | 2     | 0.020/0.022/0.026 | 0.072 (0.308)                                     | 0.033 (0.238)                                     |
| GO:0045991 | positive regulation of transcription by carbon catabolites                 | 5   | 1     | 0.020/0.022/0.023 | 0.389 (0.747)                                     | 0.274 (0.801)                                     |
| GO:0006075 | 1,3-beta-glucan biosynthetic process                                       | 2   | 1     | 0.019/0.021/0.022 | 0.179 (0.469)                                     | 0.533 (0.996)                                     |
| GO:0006078 | 1,6-beta-glucan biosynthetic process                                       | 8   | 2     | 0.020/0.021/0.023 | 0.168 (0.469)                                     | 0.848 (1.000)                                     |
| GO:0006085 | acetyl-CoA biosynthetic process                                            | 3   | 1     | 0.019/0.021/0.023 | 0.256 (0.594)                                     | 0.620 (1.000)                                     |
| GO:0006096 | glycolysis                                                                 | 34  | 8     | 0.020/0.021/0.023 | 0.011 (0.075)                                     | 0.966 (1.000)                                     |
| GO:0006800 | oxygen and reactive oxygen species metabolic process                       | 14  | 4     | 0.019/0.021/0.023 | 0.036 (0.186)                                     | 0.036 (0.250)                                     |
| GO:0019321 | pentose metabolic process                                                  | 18  | 5     | 0.019/0.021/0.023 | 0.022 (0.132)                                     | 0.339 (0.892)                                     |
| GO:0019543 | propionate catabolic process                                               | 2   | 2     | 0.019/0.021/0.022 | 0.009 (0.060)                                     | 0.255 (0.768)                                     |
| GO:0006074 | 1,3-beta-glucan metabolic process                                          | 2   | 1     | 0.019/0.020/0.022 | 0.179 (0.469)                                     | 0.491 (0.973)                                     |
| GO:0006616 | SRP-dependent cotranslational protein targeting to membrane, translocation | 10  | 4     | 0.018/0.020/0.022 | 0.010 (0.068)                                     | $5.58 \times 10^{-5}$ (0.002)                     |
| GO:0009083 | branched chain family amino acid catabolic process                         | 10  | 5     | 0.017/0.020/0.023 | 0.001 (0.011)                                     | 0.204 (0.711)                                     |
| GO:0019629 | propionate catabolic process, 2-methylcitrate cycle                        | 2   | 2     | 0.018/0.020/0.022 | 0.009 (0.060)                                     | 1.000 (1.000)                                     |
| GO:0051469 | vesicle fusion with vacuole                                                | 1   | 1     | 0.017/0.020/0.021 | 0.094 (0.319)                                     | 0.039 (0.267)                                     |
| GO:0006091 | generation of precursor metabolites and energy                             | 242 | 88    | 0.015/0.019/0.022 | $2.39 \times 10^{-32}$ ( $1.43 \times 10^{-29}$ ) | $1.21 \times 10^{-33}$ ( $7.06 \times 10^{-31}$ ) |
| GO:0006111 | regulation of gluconeogenesis                                              | 15  | 4     | 0.017/0.019/0.020 | 0.045 (0.221)                                     | 0.007 (0.085)                                     |
| GO:0006534 | cysteine metabolic process                                                 | 15  | 2     | 0.017/0.019/0.020 | 0.417 (0.788)                                     | 0.781 (1.000)                                     |
| GO:0006576 | biogenic amine metabolic process                                           | 37  | 8     | 0.016/0.019/0.022 | 0.019 (0.116)                                     | 0.316 (0.867)                                     |
| GO:0008272 | sulfate transport                                                          | 4   | 1     | 0.018/0.019/0.020 | 0.326 (0.655)                                     | 0.718 (1.000)                                     |
| GO:0016051 | carbohydrate biosynthetic process                                          | 94  | 21    | 0.015/0.019/0.023 | (0.002)                                           | (0.004)                                           |
| GO:0005980 | glycogen catabolic process                                                 | 4   | 3     | 0.016/0.018/0.018 | 0.003 (0.025)                                     | 0.023 (0.184)                                     |
| GO:0006101 | citrate metabolic process                                                  | 4   | 4     | 0.016/0.018/0.019 | $7.64 \times 10^{-5}$ (0.001)                     | 0.002 (0.034)                                     |
| GO:0006279 | premeiotic DNA synthesis                                                   | 6   | 1     | 0.017/0.018/0.020 | 0.446 (0.821)                                     | 0.077 (0.411)                                     |
| GO:0007039 | vacuolar protein catabolic process                                         | 107 | 29    | 0.015/0.018/0.020 | $7.87 \times 10^{-8}$ ( $2.15 \times 10^{-6}$ )   | $3.35 \times 10^{-13}$ ( $3.00 \times 10^{-11}$ ) |
| GO:0009408 | response to heat                                                           | 193 | 54    | 0.017/0.018/0.021 | $3.16 \times 10^{-14}$ ( $1.72 \times 10^{-12}$ ) | $2.13 \times 10^{-14}$ ( $2.48 \times 10^{-12}$ ) |

Continued on Next Page...

Table 1 – Continued

| GO ID      | Name                                                           | Pop | Study | MGSA              | TfT                                             | PCu           |
|------------|----------------------------------------------------------------|-----|-------|-------------------|-------------------------------------------------|---------------|
| GO:0010676 | positive regulation of cellular carbohydrate metabolic process | 8   | 2     | 0.016/0.018/0.019 | 0.168 (0.469)                                   | 0.302 (0.842) |
| GO:0010907 | positive regulation of glucose metabolic process               | 8   | 2     | 0.015/0.018/0.019 | 0.168 (0.469)                                   | 0.652 (1.000) |
| GO:0019933 | cAMP-mediated signaling                                        | 7   | 1     | 0.018/0.018/0.019 | 0.498 (0.882)                                   | 1.000 (1.000) |
| GO:0019935 | cyclic-nucleotide-mediated signaling                           | 7   | 1     | 0.016/0.018/0.020 | 0.498 (0.882)                                   | 0.269 (0.793) |
| GO:0031118 | rRNA pseudouridine synthesis                                   | 6   | 1     | 0.017/0.018/0.019 | 0.446 (0.821)                                   | 0.464 (0.967) |
| GO:0032950 | regulation of beta-glucan metabolic process                    | 2   | 1     | 0.016/0.018/0.019 | 0.179 (0.469)                                   | 0.479 (0.973) |
| GO:0034201 | response to oleic acid                                         | 3   | 1     | 0.016/0.018/0.019 | 0.256 (0.594)                                   | 1.000 (1.000) |
| GO:0045913 | positive regulation of carbohydrate metabolic process          | 8   | 2     | 0.015/0.018/0.020 | 0.168 (0.469)                                   | 0.304 (0.842) |
| GO:0070542 | response to fatty acid                                         | 3   | 1     | 0.017/0.018/0.020 | 0.256 (0.594)                                   | 1.000 (1.000) |
| GO:0000101 | sulfur amino acid transport                                    | 6   | 1     | 0.016/0.017/0.018 | 0.446 (0.821)                                   | 0.529 (0.993) |
| GO:0006021 | inositol biosynthetic process                                  | 6   | 1     | 0.016/0.017/0.018 | 0.446 (0.821)                                   | 0.930 (1.000) |
| GO:0006022 | aminoglycan metabolic process                                  | 21  | 2     | 0.015/0.017/0.019 | 0.599 (1.000)                                   | 0.929 (1.000) |
| GO:0006030 | chitin metabolic process                                       | 21  | 2     | 0.016/0.017/0.019 | 0.599 (1.000)                                   | 0.830 (1.000) |
| GO:0006635 | fatty acid beta-oxidation                                      | 10  | 5     | 0.016/0.017/0.019 | 0.001 (0.011)                                   | 1.000 (1.000) |
| GO:0007155 | cell adhesion                                                  | 8   | 2     | 0.015/0.017/0.019 | 0.168 (0.469)                                   | 0.147 (0.603) |
| GO:0009062 | fatty acid catabolic process                                   | 11  | 6     | 0.016/0.017/0.018 | (0.002)                                         | 0.056 (0.344) |
| GO:0015758 | glucose transport                                              | 8   | 3     | 0.016/0.017/0.019 | 0.032 (0.173)                                   | 0.769 (1.000) |
| GO:0015791 | polyol transport                                               | 6   | 1     | 0.016/0.017/0.018 | 0.446 (0.821)                                   | 0.750 (1.000) |
| GO:0022610 | biological adhesion                                            | 8   | 2     | 0.015/0.017/0.018 | 0.168 (0.469)                                   | 0.168 (0.646) |
| GO:0032951 | regulation of beta-glucan biosynthetic process                 | 2   | 1     | 0.016/0.017/0.019 | 0.179 (0.469)                                   | 0.426 (0.963) |
| GO:0033993 | response to lipid                                              | 3   | 1     | 0.016/0.017/0.019 | 0.256 (0.594)                                   | 0.175 (0.654) |
| GO:0044270 | nitrogen compound catabolic process                            | 58  | 18    | 0.012/0.017/0.021 | $2.93 \times 10^{-6}$ ( $5.87 \times 10^{-5}$ ) | (0.006)       |
| GO:0055072 | iron ion homeostasis                                           | 36  | 6     | 0.016/0.017/0.018 | 0.115 (0.370)                                   | 0.514 (0.976) |
| GO:0060917 | regulation of 1,6-beta-glucan biosynthetic process             | 2   | 1     | 0.016/0.017/0.019 | 0.179 (0.469)                                   | 0.464 (0.967) |
| GO:0001407 | glycerophosphodiester transport                                | 1   | 1     | 0.015/0.016/0.018 | 0.094 (0.319)                                   | 1.000 (1.000) |
| GO:0006008 | glucose 1-phosphate utilization                                | 2   | 1     | 0.015/0.016/0.017 | 0.179 (0.469)                                   | 1.000 (1.000) |
| GO:0006010 | glucose 6-phosphate utilization                                | 2   | 1     | 0.015/0.016/0.016 | 0.179 (0.469)                                   | 1.000 (1.000) |
| GO:0006107 | oxaloacetate metabolic process                                 | 1   | 1     | 0.014/0.016/0.017 | 0.094 (0.319)                                   | 0.348 (0.893) |
| GO:0006527 | arginine catabolic process                                     | 2   | 2     | 0.014/0.016/0.017 | 0.009 (0.060)                                   | 0.239 (0.748) |
| GO:0006533 | aspartate catabolic process                                    | 1   | 1     | 0.014/0.016/0.017 | 0.094 (0.319)                                   | 0.571 (1.000) |
| GO:0006538 | glutamate catabolic process                                    | 3   | 2     | 0.014/0.016/0.017 | 0.025 (0.137)                                   | 0.773 (1.000) |
| GO:0006562 | proline catabolic process                                      | 4   | 3     | 0.014/0.016/0.016 | 0.003 (0.025)                                   | 0.073 (0.396) |
| GO:0006572 | tyrosine catabolic process                                     | 2   | 2     | 0.015/0.016/0.017 | 0.009 (0.060)                                   | 0.036 (0.250) |
| GO:0006637 | acyl-CoA metabolic process                                     | 1   | 1     | 0.014/0.016/0.016 | 0.094 (0.319)                                   | 0.265 (0.790) |
| GO:0006843 | mitochondrial citrate transport                                | 1   | 1     | 0.015/0.016/0.017 | 0.094 (0.319)                                   | 0.104 (0.511) |
| GO:0006846 | acetate transport                                              | 2   | 1     | 0.014/0.016/0.017 | 0.179 (0.469)                                   | 0.589 (1.000) |
| GO:0006879 | cellular iron ion homeostasis                                  | 36  | 6     | 0.015/0.016/0.018 | 0.115 (0.370)                                   | 0.514 (0.976) |
| GO:0009068 | aspartate family amino acid catabolic process                  | 6   | 4     | 0.014/0.016/0.018 | (0.010)                                         | 0.026 (0.203) |
| GO:0015727 | lactate transport                                              | 1   | 1     | 0.015/0.016/0.017 | 0.094 (0.319)                                   | 0.350 (0.893) |
| GO:0015740 | C4-dicarboxylate transport                                     | 1   | 1     | 0.014/0.016/0.017 | 0.094 (0.319)                                   | 0.667 (1.000) |
| GO:0015741 | fumarate transport                                             | 1   | 1     | 0.015/0.016/0.017 | 0.094 (0.319)                                   | 0.545 (1.000) |
| GO:0015744 | succinate transport                                            | 1   | 1     | 0.015/0.016/0.017 | 0.094 (0.319)                                   | 0.556 (1.000) |
| GO:0015746 | citrate transport                                              | 2   | 1     | 0.015/0.016/0.017 | 0.179 (0.469)                                   | 0.778 (1.000) |
| GO:0015748 | organophosphate ester transport                                | 1   | 1     | 0.015/0.016/0.017 | 0.094 (0.319)                                   | 0.556 (1.000) |
| GO:0015761 | mannose transport                                              | 2   | 1     | 0.014/0.016/0.017 | 0.179 (0.469)                                   | 0.657 (1.000) |
| GO:0019255 | glucose 1-phosphate metabolic process                          | 2   | 1     | 0.014/0.016/0.017 | 0.179 (0.469)                                   | 0.444 (0.967) |

Continued on Next Page...



Table 1 – Continued

| GO ID      | Name                                                                              | Pop | Study | MGSA              | TfT                                             | PCu           |
|------------|-----------------------------------------------------------------------------------|-----|-------|-------------------|-------------------------------------------------|---------------|
| GO:0043649 | dicarboxylic acid catabolic process                                               | 1   | 1     | 0.014/0.016/0.017 | 0.094 (0.319)                                   | 0.435 (0.963) |
| GO:0051156 | glucose 6-phosphate metabolic process                                             | 2   | 1     | 0.015/0.016/0.017 | 0.179 (0.469)                                   | 0.444 (0.967) |
| GO:0000098 | sulfur amino acid catabolic process                                               | 2   | 1     | 0.014/0.015/0.016 | 0.179 (0.469)                                   | 0.435 (0.963) |
| GO:0000947 | amino acid catabolic process to alcohol via Ehrlich pathway                       | 11  | 2     | 0.014/0.015/0.017 | 0.276 (0.628)                                   | 0.650 (1.000) |
| GO:0000949 | aromatic amino acid family catabolic process to alcohol via Ehrlich pathway       | 4   | 1     | 0.014/0.015/0.017 | 0.326 (0.655)                                   | 0.670 (1.000) |
| GO:0000950 | branched chain family amino acid catabolic process to alcohol via Ehrlich pathway | 2   | 1     | 0.014/0.015/0.016 | 0.179 (0.469)                                   | 0.625 (1.000) |
| GO:0000951 | methionine catabolic process to 3-methylthiopropanol                              | 1   | 1     | 0.014/0.015/0.016 | 0.094 (0.319)                                   | 0.182 (0.659) |
| GO:0000955 | amino acid catabolic process via Ehrlich pathway                                  | 11  | 2     | 0.014/0.015/0.016 | 0.276 (0.628)                                   | 0.991 (1.000) |
| GO:0001315 | age-dependent response to reactive oxygen species                                 | 3   | 1     | 0.014/0.015/0.016 | 0.256 (0.594)                                   | 0.547 (1.000) |
| GO:0005981 | regulation of glycogen catabolic process                                          | 2   | 1     | 0.014/0.015/0.017 | 0.179 (0.469)                                   | 0.657 (1.000) |
| GO:0005999 | xylulose biosynthetic process                                                     | 1   | 1     | 0.013/0.015/0.017 | 0.094 (0.319)                                   | 0.286 (0.813) |
| GO:0006011 | UDP-glucose metabolic process                                                     | 3   | 1     | 0.014/0.015/0.017 | 0.256 (0.594)                                   | 0.569 (1.000) |
| GO:0006040 | amino sugar metabolic process                                                     | 23  | 2     | 0.013/0.015/0.016 | 0.649 (1.000)                                   | 0.981 (1.000) |
| GO:0006044 | N-acetylglucosamine metabolic process                                             | 23  | 2     | 0.013/0.015/0.016 | 0.649 (1.000)                                   | 1.000 (1.000) |
| GO:0006077 | 1,6-beta-glucan metabolic process                                                 | 9   | 2     | 0.013/0.015/0.017 | 0.204 (0.515)                                   | 0.945 (1.000) |
| GO:0006089 | lactate metabolic process                                                         | 6   | 3     | 0.014/0.015/0.017 | 0.013 (0.083)                                   | 0.215 (0.723) |
| GO:0006102 | isocitrate metabolic process                                                      | 5   | 4     | 0.014/0.015/0.016 | (0.004)                                         | 0.009 (0.096) |
| GO:0006103 | 2-oxoglutarate metabolic process                                                  | 4   | 4     | 0.014/0.015/0.017 | $7.64 \times 10^{-5}$ (0.001)                   | 0.008 (0.088) |
| GO:0006104 | succinyl-CoA metabolic process                                                    | 2   | 1     | 0.014/0.015/0.016 | 0.179 (0.469)                                   | 0.490 (0.973) |
| GO:0006106 | fumarate metabolic process                                                        | 2   | 2     | 0.014/0.015/0.016 | 0.009 (0.060)                                   | 0.111 (0.522) |
| GO:0006108 | malate metabolic process                                                          | 4   | 2     | 0.014/0.015/0.016 | 0.046 (0.221)                                   | 0.435 (0.963) |
| GO:0006116 | NADH oxidation                                                                    | 10  | 5     | 0.014/0.015/0.017 | 0.001 (0.011)                                   | 0.318 (0.867) |
| GO:0006120 | mitochondrial electron transport, NADH to ubiquinone                              | 1   | 1     | 0.014/0.015/0.016 | 0.094 (0.319)                                   | 0.818 (1.000) |
| GO:0006121 | mitochondrial electron transport, succinate to ubiquinone                         | 5   | 4     | 0.014/0.015/0.016 | (0.004)                                         | 0.790 (1.000) |
| GO:0006122 | mitochondrial electron transport, ubiquinol to cytochrome c                       | 10  | 8     | 0.014/0.015/0.016 | $2.15 \times 10^{-7}$ ( $5.37 \times 10^{-6}$ ) | 0.774 (1.000) |
| GO:0006123 | mitochondrial electron transport, cytochrome c to oxygen                          | 7   | 6     | 0.014/0.015/0.016 | $4.25 \times 10^{-6}$ ( $8.37 \times 10^{-5}$ ) | 0.622 (1.000) |
| GO:0006467 | protein thiol-disulfide exchange                                                  | 2   | 1     | 0.013/0.015/0.016 | 0.179 (0.469)                                   | 0.056 (0.344) |
| GO:0006530 | asparagine catabolic process                                                      | 1   | 1     | 0.014/0.015/0.016 | 0.094 (0.319)                                   | 0.611 (1.000) |
| GO:0006545 | glycine biosynthetic process                                                      | 2   | 1     | 0.015/0.015/0.016 | 0.179 (0.469)                                   | 0.367 (0.915) |
| GO:0006546 | glycine catabolic process                                                         | 3   | 1     | 0.014/0.015/0.016 | 0.256 (0.594)                                   | 0.643 (1.000) |
| GO:0006550 | isoleucine catabolic process                                                      | 1   | 1     | 0.014/0.015/0.016 | 0.094 (0.319)                                   | 0.357 (0.902) |
| GO:0006552 | leucine catabolic process                                                         | 3   | 2     | 0.014/0.015/0.017 | 0.025 (0.137)                                   | 0.341 (0.893) |
| GO:0006559 | L-phenylalanine catabolic process                                                 | 5   | 2     | 0.014/0.015/0.017 | 0.072 (0.308)                                   | 0.357 (0.902) |
| GO:0006567 | threonine catabolic process                                                       | 3   | 1     | 0.014/0.015/0.016 | 0.256 (0.594)                                   | 0.745 (1.000) |

Continued on Next Page...

Table 1 – Continued

| GO ID      | Name                                                          | Pop | Study | MGSA              | TfT                                               | PCu                           |
|------------|---------------------------------------------------------------|-----|-------|-------------------|---------------------------------------------------|-------------------------------|
| GO:0006569 | tryptophan catabolic process                                  | 7   | 2     | 0.014/0.015/0.016 | 0.134 (0.410)                                     | 0.318 (0.867)                 |
| GO:0006570 | tyrosine metabolic process                                    | 3   | 2     | 0.014/0.015/0.017 | 0.025 (0.137)                                     | 0.041 (0.280)                 |
| GO:0006573 | valine metabolic process                                      | 1   | 1     | 0.013/0.015/0.016 | 0.094 (0.319)                                     | 0.261 (0.784)                 |
| GO:0006574 | valine catabolic process                                      | 1   | 1     | 0.014/0.015/0.016 | 0.094 (0.319)                                     | 0.500 (0.973)                 |
| GO:0009071 | serine family amino acid catabolic process                    | 4   | 1     | 0.014/0.015/0.016 | 0.326 (0.655)                                     | 0.781 (1.000)                 |
| GO:0009074 | aromatic amino acid family catabolic process                  | 7   | 2     | 0.014/0.015/0.016 | 0.134 (0.410)                                     | 0.719 (1.000)                 |
| GO:0009087 | methionine catabolic process                                  | 1   | 1     | 0.014/0.015/0.016 | 0.094 (0.319)                                     | 0.196 (0.688)                 |
| GO:0009409 | response to cold                                              | 7   | 1     | 0.014/0.015/0.016 | 0.498 (0.882)                                     | 0.578 (1.000)                 |
| GO:0009414 | response to water deprivation                                 | 1   | 1     | 0.014/0.015/0.017 | 0.094 (0.319)                                     | 0.111 (0.522)                 |
| GO:0009436 | glyoxylate catabolic process                                  | 1   | 1     | 0.014/0.015/0.016 | 0.094 (0.319)                                     | 0.492 (0.973)                 |
| GO:0009438 | methylglyoxal metabolic process                               | 3   | 1     | 0.014/0.015/0.016 | 0.256 (0.594)                                     | 0.764 (1.000)                 |
| GO:0010133 | proline catabolic process to glutamate                        | 2   | 2     | 0.013/0.015/0.016 | 0.009 (0.060)                                     | 0.386 (0.932)                 |
| GO:0010962 | regulation of glucan biosynthetic process                     | 9   | 2     | 0.013/0.015/0.017 | 0.204 (0.515)                                     | 0.091 (0.466)                 |
| GO:0019243 | methylglyoxal catabolic process to D-lactate                  | 3   | 1     | 0.014/0.015/0.016 | 0.256 (0.594)                                     | 0.950 (1.000)                 |
| GO:0019265 | glycine biosynthetic process, by transamination of glyoxylate | 1   | 1     | 0.014/0.015/0.016 | 0.094 (0.319)                                     | 0.500 (0.973)                 |
| GO:0019266 | asparagine biosynthetic process from oxaloacetate             | 1   | 1     | 0.014/0.015/0.017 | 0.094 (0.319)                                     | 0.250 (0.766)                 |
| GO:0019319 | hexose biosynthetic process                                   | 34  | 8     | 0.013/0.015/0.017 | 0.011 (0.075)                                     | 0.428 (0.963)                 |
| GO:0019405 | alditol catabolic process                                     | 4   | 1     | 0.013/0.015/0.015 | 0.326 (0.655)                                     | 0.769 (1.000)                 |
| GO:0019413 | acetate biosynthetic process                                  | 3   | 1     | 0.014/0.015/0.017 | 0.256 (0.594)                                     | 0.479 (0.973)                 |
| GO:0019547 | arginine catabolic process to ornithine                       | 1   | 1     | 0.014/0.015/0.017 | 0.094 (0.319)                                     | 0.625 (1.000)                 |
| GO:0019551 | glutamate catabolic process to 2-oxoglutarate                 | 1   | 1     | 0.014/0.015/0.017 | 0.094 (0.319)                                     | 0.857 (1.000)                 |
| GO:0019563 | glycerol catabolic process                                    | 4   | 1     | 0.014/0.015/0.015 | 0.326 (0.655)                                     | 0.874 (1.000)                 |
| GO:0019566 | arabinose metabolic process                                   | 4   | 1     | 0.013/0.015/0.016 | 0.326 (0.655)                                     | 0.766 (1.000)                 |
| GO:0019568 | arabinose catabolic process                                   | 4   | 1     | 0.014/0.015/0.016 | 0.326 (0.655)                                     | 1.000 (1.000)                 |
| GO:0022900 | electron transport chain                                      | 55  | 26    | 0.013/0.015/0.016 | $2.64 \times 10^{-13}$ ( $1.08 \times 10^{-11}$ ) | 0.008 (0.087)                 |
| GO:0022904 | respiratory electron transport chain                          | 22  | 18    | 0.014/0.015/0.016 | $1.20 \times 10^{-15}$ ( $8.45 \times 10^{-14}$ ) | $5.14 \times 10^{-5}$ (0.002) |
| GO:0032881 | regulation of polysaccharide metabolic process                | 9   | 2     | 0.014/0.015/0.017 | 0.204 (0.515)                                     | 0.091 (0.466)                 |
| GO:0032885 | regulation of polysaccharide biosynthetic process             | 9   | 2     | 0.014/0.015/0.017 | 0.204 (0.515)                                     | 0.083 (0.435)                 |
| GO:0042436 | indole derivative catabolic process                           | 7   | 2     | 0.014/0.015/0.016 | 0.134 (0.410)                                     | 0.231 (0.745)                 |
| GO:0042631 | cellular response to water deprivation                        | 1   | 1     | 0.014/0.015/0.017 | 0.094 (0.319)                                     | 0.113 (0.528)                 |
| GO:0042743 | hydrogen peroxide metabolic process                           | 4   | 3     | 0.014/0.015/0.016 | 0.003 (0.025)                                     | 0.041 (0.279)                 |
| GO:0042744 | hydrogen peroxide catabolic process                           | 3   | 2     | 0.014/0.015/0.016 | 0.025 (0.137)                                     | 0.047 (0.306)                 |
| GO:0042773 | ATP synthesis coupled electron transport                      | 22  | 18    | 0.013/0.015/0.016 | $1.20 \times 10^{-15}$ ( $8.45 \times 10^{-14}$ ) | 0.035 (0.247)                 |
| GO:0042775 | mitochondrial ATP synthesis coupled electron transport        | 22  | 18    | 0.014/0.015/0.016 | $1.20 \times 10^{-15}$ ( $8.45 \times 10^{-14}$ ) | 1.000 (1.000)                 |
| GO:0042843 | D-xylose catabolic process                                    | 4   | 1     | 0.014/0.015/0.017 | 0.326 (0.655)                                     | 1.000 (1.000)                 |
| GO:0043255 | regulation of carbohydrate biosynthetic process               | 25  | 6     | 0.013/0.015/0.016 | 0.025 (0.137)                                     | 0.003 (0.046)                 |
| GO:0045721 | negative regulation of gluconeogenesis                        | 9   | 2     | 0.014/0.015/0.016 | 0.204 (0.515)                                     | 0.080 (0.421)                 |
| GO:0046168 | glycerol-3-phosphate catabolic process                        | 2   | 1     | 0.014/0.015/0.016 | 0.179 (0.469)                                     | 0.800 (1.000)                 |
| GO:0046185 | aldehyde catabolic process                                    | 6   | 2     | 0.014/0.015/0.016 | 0.102 (0.332)                                     | 0.178 (0.654)                 |
| GO:0046218 | indolalkylamine catabolic process                             | 7   | 2     | 0.013/0.015/0.016 | 0.134 (0.410)                                     | 0.369 (0.915)                 |

Continued on Next Page...

Table 1 – Continued

| GO ID      | Name                                                           | Pop | Study | MGSA              | TfT                                             | PCu           |
|------------|----------------------------------------------------------------|-----|-------|-------------------|-------------------------------------------------|---------------|
| GO:0046323 | glucose import                                                 | 3   | 1     | 0.014/0.015/0.016 | 0.256 (0.594)                                   | 0.821 (1.000) |
| GO:0051090 | regulation of transcription factor activity                    | 8   | 1     | 0.013/0.015/0.015 | 0.545 (0.939)                                   | 0.270 (0.794) |
| GO:0051596 | methylglyoxal catabolic process                                | 3   | 1     | 0.014/0.015/0.016 | 0.256 (0.594)                                   | 0.800 (1.000) |
| GO:0070484 | dehydro-D-arabinono-1,4-lactone metabolic process              | 2   | 1     | 0.014/0.015/0.016 | 0.179 (0.469)                                   | 0.287 (0.813) |
| GO:0070485 | dehydro-D-arabinono-1,4-lactone biosynthetic process           | 2   | 1     | 0.014/0.015/0.017 | 0.179 (0.469)                                   | 0.331 (0.881) |
| GO:0090046 | regulation of transcription regulator activity                 | 8   | 1     | 0.014/0.015/0.016 | 0.545 (0.939)                                   | 0.373 (0.917) |
| GO:0005979 | regulation of glycogen biosynthetic process                    | 7   | 1     | 0.013/0.014/0.015 | 0.498 (0.882)                                   | 0.978 (1.000) |
| GO:0006041 | glucosamine metabolic process                                  | 23  | 2     | 0.013/0.014/0.016 | 0.649 (1.000)                                   | 1.000 (1.000) |
| GO:0006537 | glutamate biosynthetic process                                 | 13  | 9     | 0.013/0.014/0.016 | $2.64 \times 10^{-7}$ ( $6.48 \times 10^{-6}$ ) | 0.099 (0.497) |
| GO:0006814 | sodium ion transport                                           | 7   | 2     | 0.013/0.014/0.016 | 0.134 (0.410)                                   | 0.555 (1.000) |
| GO:0009251 | glucan catabolic process                                       | 5   | 3     | 0.013/0.014/0.015 | 0.007 (0.051)                                   | 0.057 (0.348) |
| GO:0010677 | negative regulation of cellular carbohydrate metabolic process | 12  | 2     | 0.013/0.014/0.015 | 0.312 (0.655)                                   | 0.459 (0.967) |
| GO:0033617 | mitochondrial respiratory chain complex IV assembly            | 11  | 3     | 0.012/0.014/0.014 | 0.076 (0.314)                                   | 0.415 (0.950) |
| GO:0045912 | negative regulation of carbohydrate metabolic process          | 12  | 2     | 0.013/0.014/0.015 | 0.312 (0.655)                                   | 0.433 (0.963) |
| GO:0046174 | polyol catabolic process                                       | 4   | 1     | 0.013/0.014/0.016 | 0.326 (0.655)                                   | 0.695 (1.000) |
| GO:0070873 | regulation of glycogen metabolic process                       | 7   | 1     | 0.013/0.014/0.016 | 0.498 (0.882)                                   | 0.908 (1.000) |
| GO:0005992 | trehalose biosynthetic process                                 | 7   | 1     | 0.012/0.013/0.014 | 0.498 (0.882)                                   | 0.891 (1.000) |
| GO:0006012 | galactose metabolic process                                    | 11  | 2     | 0.012/0.013/0.014 | 0.276 (0.628)                                   | 0.798 (1.000) |
| GO:0009312 | oligosaccharide biosynthetic process                           | 7   | 1     | 0.012/0.013/0.014 | 0.498 (0.882)                                   | 0.831 (1.000) |
| GO:0010043 | response to zinc ion                                           | 2   | 1     | 0.011/0.013/0.014 | 0.179 (0.469)                                   | 0.368 (0.915) |
| GO:0016138 | glycoside biosynthetic process                                 | 7   | 1     | 0.012/0.013/0.014 | 0.498 (0.882)                                   | 0.863 (1.000) |
| GO:0019655 | glucose catabolic process to ethanol                           | 7   | 1     | 0.012/0.013/0.014 | 0.498 (0.882)                                   | 0.893 (1.000) |
| GO:0019660 | glycolytic fermentation                                        | 7   | 1     | 0.013/0.013/0.014 | 0.498 (0.882)                                   | 0.902 (1.000) |
| GO:0042219 | cellular amino acid derivative catabolic process               | 19  | 3     | 0.012/0.013/0.015 | 0.261 (0.605)                                   | 0.468 (0.970) |
| GO:0046351 | disaccharide biosynthetic process                              | 7   | 1     | 0.012/0.013/0.015 | 0.498 (0.882)                                   | 0.863 (1.000) |
| GO:0006555 | methionine metabolic process                                   | 40  | 6     | 0.012/0.012/0.013 | 0.167 (0.469)                                   | 0.744 (1.000) |
| GO:0006595 | polyamine metabolic process                                    | 8   | 1     | 0.011/0.012/0.012 | 0.545 (0.939)                                   | 0.889 (1.000) |
| GO:0010383 | cell wall polysaccharide metabolic process                     | 17  | 1     | 0.011/0.012/0.013 | 0.813 (1.000)                                   | 0.970 (1.000) |
| GO:0031668 | cellular response to extracellular stimulus                    | 58  | 10    | 0.011/0.012/0.013 | 0.041 (0.210)                                   | 0.028 (0.213) |
| GO:0031669 | cellular response to nutrient levels                           | 56  | 9     | 0.010/0.012/0.013 | 0.074 (0.314)                                   | 0.635 (1.000) |
| GO:0000060 | protein import into nucleus, translocation                     | 2   | 1     | 0.010/0.011/0.012 | 0.179 (0.469)                                   | 0.073 (0.396) |
| GO:0000096 | sulfur amino acid metabolic process                            | 47  | 7     | 0.010/0.011/0.012 | 0.146 (0.439)                                   | 0.763 (1.000) |
| GO:0001682 | tRNA 5'-leader removal                                         | 2   | 1     | 0.010/0.011/0.012 | 0.179 (0.469)                                   | 0.038 (0.264) |
| GO:0005996 | monosaccharide metabolic process                               | 139 | 30    | 0.009/0.011/0.013 | $8.83 \times 10^{-6}$ ()                        | 0.152 (0.612) |
| GO:0006177 | GMP biosynthetic process                                       | 3   | 1     | 0.010/0.011/0.012 | 0.256 (0.594)                                   | 0.158 (0.629) |
| GO:0006531 | aspartate metabolic process                                    | 2   | 1     | 0.010/0.011/0.012 | 0.179 (0.469)                                   | 0.303 (0.842) |
| GO:0006532 | aspartate biosynthetic process                                 | 2   | 1     | 0.010/0.011/0.012 | 0.179 (0.469)                                   | 0.268 (0.793) |
| GO:0006558 | L-phenylalanine metabolic process                              | 6   | 2     | 0.010/0.011/0.013 | 0.102 (0.332)                                   | 0.184 (0.665) |

Continued on Next Page...

Table 1 – Continued

| GO ID      | Name                                                  | Pop | Study | MGSA              | TfT                                             | PCu           |
|------------|-------------------------------------------------------|-----|-------|-------------------|-------------------------------------------------|---------------|
| GO:0006734 | NADH metabolic process                                | 12  | 5     | 0.010/0.011/0.012 | 0.003 (0.026)                                   | 0.095 (0.483) |
| GO:0006842 | tricarboxylic acid transport                          | 3   | 1     | 0.011/0.011/0.012 | 0.256 (0.594)                                   | 0.432 (0.963) |
| GO:0010942 | positive regulation of cell death                     | 3   | 2     | 0.010/0.011/0.012 | 0.025 (0.137)                                   | 0.048 (0.311) |
| GO:0015824 | proline transport                                     | 2   | 1     | 0.011/0.011/0.013 | 0.179 (0.469)                                   | 0.667 (1.000) |
| GO:0015846 | polyamine transport                                   | 12  | 2     | 0.009/0.011/0.012 | 0.312 (0.655)                                   | 0.412 (0.950) |
| GO:0015866 | ADP transport                                         | 2   | 1     | 0.010/0.011/0.012 | 0.179 (0.469)                                   | 0.500 (0.973) |
| GO:0015867 | ATP transport                                         | 4   | 1     | 0.010/0.011/0.012 | 0.326 (0.655)                                   | 1.000 (1.000) |
| GO:0015868 | purine ribonucleotide transport                       | 4   | 1     | 0.010/0.011/0.011 | 0.326 (0.655)                                   | 0.800 (1.000) |
| GO:0015976 | carbon utilization                                    | 4   | 1     | 0.010/0.011/0.012 | 0.326 (0.655)                                   | 0.333 (0.883) |
| GO:0017062 | respiratory chain complex III assembly                | 3   | 2     | 0.010/0.011/0.012 | 0.025 (0.137)                                   | 0.143 (0.592) |
| GO:0019388 | galactose catabolic process                           | 6   | 1     | 0.010/0.011/0.012 | 0.446 (0.821)                                   | 0.813 (1.000) |
| GO:0019676 | ammonia assimilation cycle                            | 5   | 2     | 0.010/0.011/0.012 | 0.072 (0.308)                                   | 0.549 (1.000) |
| GO:0031056 | regulation of histone modification                    | 6   | 1     | 0.010/0.011/0.012 | 0.446 (0.821)                                   | 0.135 (0.572) |
| GO:0032780 | negative regulation of ATPase activity                | 3   | 2     | 0.010/0.011/0.012 | 0.025 (0.137)                                   | 0.500 (0.973) |
| GO:0033215 | iron assimilation by reduction and transport          | 2   | 1     | 0.011/0.011/0.012 | 0.179 (0.469)                                   | 0.800 (1.000) |
| GO:0034354 | de novo NAD biosynthetic process from tryptophan      | 4   | 1     | 0.010/0.011/0.012 | 0.326 (0.655)                                   | 1.000 (1.000) |
| GO:0034551 | mitochondrial respiratory chain complex III assembly  | 3   | 2     | 0.010/0.011/0.012 | 0.025 (0.137)                                   | 0.117 (0.536) |
| GO:0034614 | cellular response to reactive oxygen species          | 4   | 2     | 0.010/0.011/0.012 | 0.046 (0.221)                                   | 0.108 (0.517) |
| GO:0034627 | de novo NAD biosynthetic process                      | 4   | 1     | 0.010/0.011/0.012 | 0.326 (0.655)                                   | 0.364 (0.912) |
| GO:0042439 | ethanolamine and derivative metabolic process         | 14  | 2     | 0.010/0.011/0.012 | 0.383 (0.747)                                   | 0.786 (1.000) |
| GO:0043065 | positive regulation of apoptosis                      | 3   | 2     | 0.010/0.011/0.012 | 0.025 (0.137)                                   | 0.107 (0.517) |
| GO:0043068 | positive regulation of programmed cell death          | 3   | 2     | 0.010/0.011/0.012 | 0.025 (0.137)                                   | 0.091 (0.466) |
| GO:0043462 | regulation of ATPase activity                         | 4   | 3     | 0.010/0.011/0.013 | 0.003 (0.025)                                   | 0.002 (0.036) |
| GO:0044247 | cellular polysaccharide catabolic process             | 6   | 3     | 0.010/0.011/0.012 | 0.013 (0.083)                                   | 0.016 (0.147) |
| GO:0046688 | response to copper ion                                | 2   | 1     | 0.010/0.011/0.012 | 0.179 (0.469)                                   | 0.368 (0.915) |
| GO:0051503 | adenine nucleotide transport                          | 4   | 1     | 0.010/0.011/0.012 | 0.326 (0.655)                                   | 0.800 (1.000) |
| GO:0070301 | cellular response to hydrogen peroxide                | 4   | 2     | 0.010/0.011/0.012 | 0.046 (0.221)                                   | 0.214 (0.723) |
| GO:0000105 | histidine biosynthetic process                        | 11  | 3     | 0.009/0.010/0.011 | 0.076 (0.314)                                   | 0.308 (0.848) |
| GO:0006067 | ethanol metabolic process                             | 12  | 3     | 0.009/0.010/0.010 | 0.095 (0.321)                                   | 1.000 (1.000) |
| GO:0006536 | glutamate metabolic process                           | 18  | 12    | 0.009/0.010/0.012 | $4.45 \times 10^{-9}$ ( $1.40 \times 10^{-7}$ ) | 0.001 (0.021) |
| GO:0006547 | histidine metabolic process                           | 11  | 3     | 0.009/0.010/0.011 | 0.076 (0.314)                                   | 0.234 (0.746) |
| GO:0006749 | glutathione metabolic process                         | 14  | 3     | 0.009/0.010/0.011 | 0.137 (0.415)                                   | 0.624 (1.000) |
| GO:0006882 | cellular zinc ion homeostasis                         | 10  | 2     | 0.009/0.010/0.011 | 0.240 (0.594)                                   | 0.481 (0.973) |
| GO:0008360 | regulation of cell shape                              | 11  | 3     | 0.009/0.010/0.010 | 0.076 (0.314)                                   | 0.025 (0.194) |
| GO:0009075 | histidine family amino acid metabolic process         | 11  | 3     | 0.008/0.010/0.010 | 0.076 (0.314)                                   | 0.325 (0.876) |
| GO:0009076 | histidine family amino acid biosynthetic process      | 11  | 3     | 0.009/0.010/0.011 | 0.076 (0.314)                                   | 0.488 (0.973) |
| GO:0009082 | branched chain family amino acid biosynthetic process | 14  | 3     | 0.009/0.010/0.010 | 0.137 (0.415)                                   | 0.682 (1.000) |
| GO:0034308 | monohydric alcohol metabolic process                  | 12  | 3     | 0.008/0.010/0.010 | 0.095 (0.321)                                   | 0.413 (0.950) |
| GO:0045454 | cell redox homeostasis                                | 29  | 5     | 0.009/0.010/0.011 | 0.129 (0.409)                                   | 0.021 (0.170) |
| GO:0046655 | folic acid metabolic process                          | 4   | 1     | 0.009/0.010/0.011 | 0.326 (0.655)                                   | 0.563 (1.000) |

Continued on Next Page...

Table 1 – Continued

| GO ID      | Name                                                          | Pop | Study | MGSA              | TfT                                               | PCu                                               |
|------------|---------------------------------------------------------------|-----|-------|-------------------|---------------------------------------------------|---------------------------------------------------|
| GO:0046656 | folic acid biosynthetic process                               | 4   | 1     | 0.009/0.010/0.011 | 0.326 (0.655)                                     | 0.540 (1.000)                                     |
| GO:0055069 | zinc ion homeostasis                                          | 10  | 2     | 0.009/0.010/0.011 | 0.240 (0.594)                                     | 0.481 (0.973)                                     |
| GO:0000290 | deadenylation-dependent decapping of nuclear-transcribed mRNA | 8   | 1     | 0.008/0.009/0.010 | 0.545 (0.939)                                     | 0.462 (0.967)                                     |
| GO:0006119 | oxidative phosphorylation                                     | 50  | 33    | 0.008/0.009/0.010 | $9.35 \times 10^{-23}$ ( $2.24 \times 10^{-20}$ ) | $2.27 \times 10^{-12}$ ( $1.89 \times 10^{-10}$ ) |
| GO:0006544 | glycine metabolic process                                     | 7   | 2     | 0.008/0.009/0.010 | 0.134 (0.410)                                     | 0.360 (0.906)                                     |
| GO:0006739 | NADP metabolic process                                        | 23  | 7     | 0.008/0.009/0.010 | 0.004 (0.031)                                     | 0.464 (0.967)                                     |
| GO:0009081 | branched chain family amino acid metabolic process            | 23  | 6     | 0.007/0.009/0.010 | 0.017 (0.103)                                     | 0.225 (0.733)                                     |
| GO:0015802 | basic amino acid transport                                    | 8   | 1     | 0.009/0.009/0.010 | 0.545 (0.939)                                     | 0.643 (1.000)                                     |
| GO:0015850 | organic alcohol transport                                     | 8   | 1     | 0.008/0.009/0.009 | 0.545 (0.939)                                     | 0.555 (1.000)                                     |
| GO:0000304 | response to singlet oxygen                                    | 4   | 1     | 0.007/0.008/0.009 | 0.326 (0.655)                                     | 0.670 (1.000)                                     |
| GO:0006023 | aminoglycan biosynthetic process                              | 16  | 1     | 0.007/0.008/0.009 | 0.793 (1.000)                                     | 0.993 (1.000)                                     |
| GO:0006031 | chitin biosynthetic process                                   | 16  | 1     | 0.007/0.008/0.009 | 0.793 (1.000)                                     | 0.992 (1.000)                                     |
| GO:0006073 | cellular glucan metabolic process                             | 43  | 10    | 0.006/0.008/0.009 | 0.005 (0.040)                                     | 0.112 (0.525)                                     |
| GO:0006206 | pyrimidine base metabolic process                             | 16  | 2     | 0.008/0.008/0.009 | 0.451 (0.827)                                     | 0.171 (0.649)                                     |
| GO:0006549 | isoleucine metabolic process                                  | 5   | 1     | 0.008/0.008/0.009 | 0.389 (0.747)                                     | 0.816 (1.000)                                     |
| GO:0006656 | phosphatidylcholine biosynthetic process                      | 9   | 1     | 0.007/0.008/0.009 | 0.588 (1.000)                                     | 0.435 (0.963)                                     |
| GO:0006760 | folic acid and derivative metabolic process                   | 12  | 1     | 0.006/0.008/0.008 | 0.693 (1.000)                                     | 0.932 (1.000)                                     |
| GO:0006779 | porphyrin biosynthetic process                                | 16  | 3     | 0.007/0.008/0.009 | 0.184 (0.478)                                     | 0.104 (0.509)                                     |
| GO:0006783 | heme biosynthetic process                                     | 16  | 3     | 0.007/0.008/0.009 | 0.184 (0.478)                                     | 0.496 (0.973)                                     |
| GO:0006813 | potassium ion transport                                       | 8   | 1     | 0.007/0.008/0.009 | 0.545 (0.939)                                     | 0.906 (1.000)                                     |
| GO:0008535 | respiratory chain complex IV assembly                         | 13  | 3     | 0.008/0.008/0.009 | 0.115 (0.370)                                     | 0.014 (0.129)                                     |
| GO:0009060 | aerobic respiration                                           | 87  | 40    | 0.007/0.008/0.010 | $2.62 \times 10^{-19}$ ( $5.24 \times 10^{-17}$ ) | 0.993 (1.000)                                     |
| GO:0009396 | folic acid and derivative biosynthetic process                | 11  | 1     | 0.007/0.008/0.008 | 0.662 (1.000)                                     | 0.509 (0.976)                                     |
| GO:0015804 | neutral amino acid transport                                  | 3   | 1     | 0.007/0.008/0.009 | 0.256 (0.594)                                     | 0.304 (0.842)                                     |
| GO:0015812 | gamma-aminobutyric acid transport                             | 3   | 1     | 0.007/0.008/0.008 | 0.256 (0.594)                                     | 0.750 (1.000)                                     |
| GO:0015865 | purine nucleotide transport                                   | 5   | 1     | 0.007/0.008/0.009 | 0.389 (0.747)                                     | 0.455 (0.967)                                     |
| GO:0019439 | aromatic compound catabolic process                           | 9   | 2     | 0.007/0.008/0.008 | 0.204 (0.515)                                     | 0.327 (0.880)                                     |
| GO:0033014 | tetrapyrrole biosynthetic process                             | 16  | 3     | 0.007/0.008/0.009 | 0.184 (0.478)                                     | 0.617 (1.000)                                     |
| GO:0044042 | glucan metabolic process                                      | 43  | 10    | 0.007/0.008/0.010 | 0.005 (0.040)                                     | 0.129 (0.567)                                     |
| GO:0045980 | negative regulation of nucleotide metabolic process           | 4   | 2     | 0.007/0.008/0.009 | 0.046 (0.221)                                     | 0.101 (0.499)                                     |
| GO:0000272 | polysaccharide catabolic process                              | 9   | 3     | 0.007/0.007/0.008 | 0.045 (0.221)                                     | 0.057 (0.348)                                     |
| GO:0000289 | nuclear-transcribed mRNA poly(A) tail shortening              | 9   | 1     | 0.006/0.007/0.007 | 0.588 (1.000)                                     | 0.397 (0.938)                                     |
| GO:0006042 | glucosamine biosynthetic process                              | 18  | 1     | 0.006/0.007/0.008 | 0.830 (1.000)                                     | 0.960 (1.000)                                     |
| GO:0006045 | N-acetylglucosamine biosynthetic process                      | 18  | 1     | 0.006/0.007/0.008 | 0.830 (1.000)                                     | 0.960 (1.000)                                     |
| GO:0006827 | high-affinity iron ion transport                              | 4   | 1     | 0.006/0.007/0.007 | 0.326 (0.655)                                     | 1.000 (1.000)                                     |
| GO:0009651 | response to salt stress                                       | 17  | 2     | 0.006/0.007/0.008 | 0.483 (0.878)                                     | 0.282 (0.809)                                     |
| GO:0010565 | regulation of cellular ketone metabolic process               | 19  | 4     | 0.007/0.007/0.008 | 0.095 (0.321)                                     | 0.107 (0.517)                                     |
| GO:0015674 | di-, tri-valent inorganic cation transport                    | 43  | 8     | 0.005/0.007/0.008 | 0.044 (0.221)                                     | 0.914 (1.000)                                     |
| GO:0016973 | poly(A)+ mRNA export from nucleus                             | 9   | 1     | 0.006/0.007/0.007 | 0.588 (1.000)                                     | 0.130 (0.567)                                     |
| GO:0046349 | amino sugar biosynthetic process                              | 18  | 1     | 0.006/0.007/0.008 | 0.830 (1.000)                                     | 0.994 (1.000)                                     |
| GO:0000041 | transition metal ion transport                                | 52  | 9     | 0.005/0.006/0.008 | 0.050 (0.236)                                     | 0.611 (1.000)                                     |
| GO:0006140 | regulation of nucleotide metabolic process                    | 5   | 2     | 0.005/0.006/0.006 | 0.072 (0.308)                                     | 0.067 (0.377)                                     |

Continued on Next Page...

Table 1 – Continued

| GO ID      | Name                                          | Pop | Study | MGSA              | TfT           | PCu           |
|------------|-----------------------------------------------|-----|-------|-------------------|---------------|---------------|
| GO:0006528 | asparagine metabolic process                  | 5   | 2     | 0.006/0.006/0.007 | 0.072 (0.308) | 0.185 (0.665) |
| GO:0006529 | asparagine biosynthetic process               | 4   | 1     | 0.005/0.006/0.006 | 0.326 (0.655) | 0.514 (0.976) |
| GO:0006741 | NADP biosynthetic process                     | 4   | 1     | 0.005/0.006/0.007 | 0.326 (0.655) | 0.678 (1.000) |
| GO:0009225 | nucleotide-sugar metabolic process            | 7   | 1     | 0.006/0.006/0.007 | 0.498 (0.882) | 0.363 (0.912) |
| GO:0010941 | regulation of cell death                      | 6   | 2     | 0.005/0.006/0.006 | 0.102 (0.332) | 0.060 (0.358) |
| GO:0015807 | L-amino acid transport                        | 4   | 1     | 0.005/0.006/0.007 | 0.326 (0.655) | 0.387 (0.932) |
| GO:0030162 | regulation of proteolysis                     | 7   | 2     | 0.006/0.006/0.007 | 0.134 (0.410) | 0.055 (0.340) |
| GO:0042542 | response to hydrogen peroxide                 | 8   | 2     | 0.005/0.006/0.006 | 0.168 (0.469) | 0.615 (1.000) |
| GO:0042723 | thiamin and derivative metabolic process      | 13  | 1     | 0.006/0.006/0.007 | 0.722 (1.000) | 0.924 (1.000) |
| GO:0042981 | regulation of apoptosis                       | 6   | 2     | 0.005/0.006/0.007 | 0.102 (0.332) | 0.392 (0.934) |
| GO:0043067 | regulation of programmed cell death           | 6   | 2     | 0.005/0.006/0.007 | 0.102 (0.332) | 0.343 (0.893) |
| GO:0044273 | sulfur compound catabolic process             | 8   | 1     | 0.006/0.006/0.007 | 0.545 (0.939) | 0.674 (1.000) |
| GO:0046037 | GMP metabolic process                         | 5   | 1     | 0.005/0.006/0.006 | 0.389 (0.747) | 0.250 (0.766) |
| GO:0051346 | negative regulation of hydrolase activity     | 5   | 2     | 0.005/0.006/0.006 | 0.072 (0.308) | 0.072 (0.394) |
| GO:0070086 | ubiquitin-dependent endocytosis               | 10  | 1     | 0.005/0.006/0.006 | 0.627 (1.000) | 0.281 (0.809) |
| GO:0006566 | threonine metabolic process                   | 9   | 1     | 0.004/0.005/0.005 | 0.588 (1.000) | 0.825 (1.000) |
| GO:0017004 | cytochrome complex assembly                   | 7   | 2     | 0.005/0.005/0.006 | 0.134 (0.410) | 0.034 (0.245) |
| GO:0042558 | pteridine and derivative metabolic process    | 7   | 1     | 0.004/0.005/0.005 | 0.498 (0.882) | 0.445 (0.967) |
| GO:0042559 | pteridine and derivative biosynthetic process | 7   | 1     | 0.004/0.005/0.005 | 0.498 (0.882) | 0.768 (1.000) |
| GO:0044092 | negative regulation of molecular function     | 24  | 4     | 0.004/0.005/0.005 | 0.182 (0.477) | 0.114 (0.531) |
| GO:0044272 | sulfur compound biosynthetic process          | 58  | 6     | 0.004/0.005/0.006 | 0.464 (0.850) | 0.431 (0.963) |
| GO:0000032 | cell wall mannoprotein biosynthetic process   | 12  | 1     | 0.004/0.004/0.005 | 0.693 (1.000) | 1.000 (1.000) |
| GO:0000154 | rRNA modification                             | 24  | 3     | 0.003/0.004/0.004 | 0.394 (0.752) | 0.020 (0.170) |
| GO:0000266 | mitochondrial fission                         | 5   | 1     | 0.004/0.004/0.005 | 0.389 (0.747) | 0.092 (0.466) |
| GO:0006057 | mannoprotein biosynthetic process             | 12  | 1     | 0.004/0.004/0.004 | 0.693 (1.000) | 0.515 (0.977) |
| GO:0006672 | ceramide metabolic process                    | 13  | 1     | 0.003/0.004/0.004 | 0.722 (1.000) | 0.867 (1.000) |
| GO:0007129 | synapsis                                      | 10  | 1     | 0.004/0.004/0.005 | 0.627 (1.000) | 0.380 (0.924) |
| GO:0009072 | aromatic amino acid family metabolic process  | 21  | 3     | 0.003/0.004/0.005 | 0.314 (0.655) | 0.680 (1.000) |
| GO:0019322 | pentose biosynthetic process                  | 6   | 1     | 0.003/0.004/0.004 | 0.446 (0.821) | 0.752 (1.000) |
| GO:0030476 | ascospore wall assembly                       | 28  | 4     | 0.003/0.004/0.004 | 0.265 (0.609) | 1.000 (1.000) |
| GO:0031506 | cell wall glycoprotein biosynthetic process   | 12  | 1     | 0.004/0.004/0.005 | 0.693 (1.000) | 0.458 (0.967) |
| GO:0034599 | cellular response to oxidative stress         | 9   | 2     | 0.004/0.004/0.005 | 0.204 (0.515) | 0.294 (0.827) |
| GO:0042244 | spore wall assembly                           | 28  | 4     | 0.003/0.004/0.004 | 0.265 (0.609) | 0.216 (0.723) |
| GO:0046470 | phosphatidylcholine metabolic process         | 11  | 1     | 0.004/0.004/0.005 | 0.662 (1.000) | 0.543 (1.000) |
| GO:0070192 | chromosome organization involved in meiosis   | 10  | 1     | 0.003/0.004/0.005 | 0.627 (1.000) | 0.172 (0.651) |
| GO:0070590 | spore wall biogenesis                         | 28  | 4     | 0.003/0.004/0.004 | 0.265 (0.609) | 0.319 (0.868) |
| GO:0070591 | ascospore wall biogenesis                     | 28  | 4     | 0.003/0.004/0.004 | 0.265 (0.609) | 0.243 (0.756) |
| GO:0070726 | cell wall assembly                            | 29  | 5     | 0.003/0.004/0.004 | 0.129 (0.409) | 0.005 (0.064) |
| GO:0000302 | response to reactive oxygen species           | 14  | 3     | 0.003/0.003/0.003 | 0.137 (0.415) | 0.596 (1.000) |
| GO:0006553 | lysine metabolic process                      | 10  | 1     | 0.003/0.003/0.003 | 0.627 (1.000) | 0.858 (1.000) |
| GO:0006568 | tryptophan metabolic process                  | 12  | 2     | 0.003/0.003/0.004 | 0.312 (0.655) | 0.612 (1.000) |
| GO:0006586 | indolalkylamine metabolic process             | 12  | 2     | 0.003/0.003/0.004 | 0.312 (0.655) | 0.823 (1.000) |
| GO:0006790 | sulfur metabolic process                      | 89  | 12    | 0.002/0.003/0.004 | 0.126 (0.400) | 0.126 (0.564) |
| GO:0007007 | inner mitochondrial membrane organization     | 15  | 4     | 0.003/0.003/0.004 | 0.045 (0.221) | 0.038 (0.263) |

Continued on Next Page...

Table 1 – Continued

| GO ID      | Name                                                                               | Pop | Study | MGSA              | TfT                                               | PCu                                               |
|------------|------------------------------------------------------------------------------------|-----|-------|-------------------|---------------------------------------------------|---------------------------------------------------|
| GO:0008219 | cell death                                                                         | 51  | 28    | 0.003/0.003/0.003 | $1.99 \times 10^{-16}$ ( $2.00 \times 10^{-14}$ ) | $1.90 \times 10^{-17}$ ( $3.69 \times 10^{-15}$ ) |
| GO:0008652 | cellular amino acid biosynthetic process                                           | 130 | 30    | 0.002/0.003/0.004 | $2.06 \times 10^{-6}$ ( $4.35 \times 10^{-5}$ )   | 0.002 (0.036)                                     |
| GO:0009085 | lysine biosynthetic process                                                        | 10  | 1     | 0.003/0.003/0.003 | 0.627 (1.000)                                     | 0.821 (1.000)                                     |
| GO:0010553 | negative regulation of gene-specific transcription from RNA polymerase II promoter | 11  | 1     | 0.003/0.003/0.004 | 0.662 (1.000)                                     | 0.483 (0.973)                                     |
| GO:0016265 | death                                                                              | 51  | 28    | 0.003/0.003/0.004 | $1.99 \times 10^{-16}$ ( $2.00 \times 10^{-14}$ ) | $1.99 \times 10^{-16}$ ( $3.32 \times 10^{-14}$ ) |
| GO:0018130 | heterocycle biosynthetic process                                                   | 50  | 9     | 0.002/0.003/0.003 | 0.040 (0.208)                                     | 0.031 (0.227)                                     |
| GO:0018205 | peptidyl-lysine modification                                                       | 10  | 1     | 0.003/0.003/0.003 | 0.627 (1.000)                                     | 0.460 (0.967)                                     |
| GO:0019878 | lysine biosynthetic process via aminoadipic acid                                   | 8   | 1     | 0.003/0.003/0.003 | 0.545 (0.939)                                     | 0.800 (1.000)                                     |
| GO:0032582 | negative regulation of gene-specific transcription                                 | 11  | 1     | 0.003/0.003/0.004 | 0.662 (1.000)                                     | 0.295 (0.827)                                     |
| GO:0042430 | indole and derivative metabolic process                                            | 12  | 2     | 0.003/0.003/0.004 | 0.312 (0.655)                                     | 0.251 (0.767)                                     |
| GO:0042434 | indole derivative metabolic process                                                | 12  | 2     | 0.003/0.003/0.004 | 0.312 (0.655)                                     | 1.000 (1.000)                                     |
| GO:0042440 | pigment metabolic process                                                          | 26  | 4     | 0.003/0.003/0.003 | 0.223 (0.560)                                     | 0.237 (0.748)                                     |
| GO:0042790 | transcription of nuclear rRNA large RNA polymerase I transcript                    | 11  | 1     | 0.003/0.003/0.004 | 0.662 (1.000)                                     | 0.212 (0.723)                                     |
| GO:0044036 | cell wall macromolecule metabolic process                                          | 29  | 2     | 0.003/0.003/0.004 | 0.770 (1.000)                                     | 0.603 (1.000)                                     |
| GO:0046686 | response to cadmium ion                                                            | 9   | 1     | 0.003/0.003/0.004 | 0.588 (1.000)                                     | 0.932 (1.000)                                     |
| GO:0051180 | vitamin transport                                                                  | 10  | 1     | 0.002/0.003/0.003 | 0.627 (1.000)                                     | 0.636 (1.000)                                     |
| GO:0051259 | protein oligomerization                                                            | 7   | 2     | 0.003/0.003/0.003 | 0.134 (0.410)                                     | 0.075 (0.405)                                     |
| GO:0000045 | autophagic vacuole formation                                                       | 9   | 1     | 0.001/0.002/0.002 | 0.588 (1.000)                                     | 0.288 (0.814)                                     |
| GO:0005976 | polysaccharide metabolic process                                                   | 66  | 12    | 0.001/0.002/0.002 | 0.018 (0.111)                                     | 0.002 (0.035)                                     |
| GO:0005977 | glycogen metabolic process                                                         | 31  | 7     | 0.002/0.002/0.003 | 0.022 (0.132)                                     | 0.487 (0.973)                                     |
| GO:0006797 | polyphosphate metabolic process                                                    | 9   | 1     | 0.002/0.002/0.002 | 0.588 (1.000)                                     | 0.803 (1.000)                                     |
| GO:0009067 | aspartate family amino acid biosynthetic process                                   | 49  | 7     | 0.002/0.002/0.003 | 0.171 (0.469)                                     | 0.987 (1.000)                                     |
| GO:0009309 | amine biosynthetic process                                                         | 138 | 31    | 0.002/0.002/0.003 | $2.57 \times 10^{-6}$ ( $5.32 \times 10^{-5}$ )   | 0.013 (0.124)                                     |
| GO:0009435 | NAD biosynthetic process                                                           | 11  | 1     | 0.001/0.002/0.002 | 0.662 (1.000)                                     | 0.987 (1.000)                                     |
| GO:0009605 | response to external stimulus                                                      | 64  | 10    | 0.002/0.002/0.002 | 0.072 (0.308)                                     | 0.133 (0.572)                                     |
| GO:0009991 | response to extracellular stimulus                                                 | 64  | 10    | 0.002/0.002/0.003 | 0.072 (0.308)                                     | 1.000 (1.000)                                     |
| GO:0015985 | energy coupled proton transport, down electrochemical gradient                     | 27  | 14    | 0.002/0.002/0.002 | $2.15 \times 10^{-8}$ ( $6.46 \times 10^{-7}$ )   | 0.017 (0.155)                                     |
| GO:0015986 | ATP synthesis coupled proton transport                                             | 27  | 14    | 0.001/0.002/0.002 | $2.15 \times 10^{-8}$ ( $6.46 \times 10^{-7}$ )   | 0.673 (1.000)                                     |
| GO:0030005 | cellular di-, tri-valent inorganic cation homeostasis                              | 65  | 10    | 0.001/0.002/0.002 | 0.079 (0.319)                                     | 0.008 (0.093)                                     |
| GO:0030258 | lipid modification                                                                 | 30  | 8     | 0.001/0.002/0.002 | 0.005 (0.039)                                     | 0.004 (0.047)                                     |
| GO:0031365 | N-terminal protein amino acid modification                                         | 14  | 1     | 0.001/0.002/0.002 | 0.748 (1.000)                                     | 0.586 (1.000)                                     |
| GO:0031399 | regulation of protein modification process                                         | 11  | 1     | 0.002/0.002/0.003 | 0.662 (1.000)                                     | 0.412 (0.950)                                     |
| GO:0031667 | response to nutrient levels                                                        | 62  | 9     | 0.002/0.002/0.002 | 0.122 (0.390)                                     | 0.978 (1.000)                                     |
| GO:0032844 | regulation of homeostatic process                                                  | 12  | 1     | 0.002/0.002/0.003 | 0.693 (1.000)                                     | 0.499 (0.973)                                     |
| GO:0042401 | biogenic amine biosynthetic process                                                | 13  | 1     | 0.002/0.002/0.003 | 0.722 (1.000)                                     | 0.968 (1.000)                                     |
| GO:0043086 | negative regulation of catalytic activity                                          | 20  | 3     | 0.002/0.002/0.002 | 0.287 (0.651)                                     | 0.161 (0.631)                                     |
| GO:0044038 | cell wall macromolecule biosynthetic process                                       | 24  | 1     | 0.002/0.002/0.002 | 0.906 (1.000)                                     | 0.968 (1.000)                                     |
| GO:0046165 | alcohol biosynthetic process                                                       | 81  | 15    | 0.001/0.002/0.002 | 0.007 (0.053)                                     | 0.008 (0.086)                                     |
| GO:0046519 | sphingoid metabolic process                                                        | 15  | 1     | 0.002/0.002/0.003 | 0.772 (1.000)                                     | 0.455 (0.967)                                     |
| GO:0051098 | regulation of binding                                                              | 30  | 4     | 0.002/0.002/0.003 | 0.308 (0.655)                                     | 0.219 (0.723)                                     |

Continued on Next Page...

Table 1 – Continued

| GO ID      | Name                                                        | Pop | Study | MGSA              | TfT                                             | PCu                                             |
|------------|-------------------------------------------------------------|-----|-------|-------------------|-------------------------------------------------|-------------------------------------------------|
| GO:0055066 | di-, tri-valent inorganic cation homeostasis                | 65  | 10    | 0.001/0.002/0.002 | 0.079 (0.319)                                   | 0.006 (0.067)                                   |
| GO:0070589 | cellular component macromolecule biosynthetic process       | 24  | 1     | 0.002/0.002/0.002 | 0.906 (1.000)                                   | 0.810 (1.000)                                   |
| GO:0001522 | pseudouridine synthesis                                     | 16  | 1     | 0.000/0.001/0.001 | 0.793 (1.000)                                   | 0.337 (0.889)                                   |
| GO:0006056 | mannoprotein metabolic process                              | 16  | 1     | 0.001/0.001/0.001 | 0.793 (1.000)                                   | 0.626 (1.000)                                   |
| GO:0006066 | alcohol metabolic process                                   | 245 | 47    | 0.000/0.001/0.001 | $9.57 \times 10^{-7}$ ( $2.09 \times 10^{-5}$ ) | $1.52 \times 10^{-6}$ ( $6.09 \times 10^{-5}$ ) |
| GO:0006112 | energy reserve metabolic process                            | 41  | 8     | 0.001/0.001/0.002 | 0.034 (0.180)                                   | 1.000 (1.000)                                   |
| GO:0006518 | peptide metabolic process                                   | 24  | 3     | 0.001/0.001/0.001 | 0.394 (0.752)                                   | 0.396 (0.938)                                   |
| GO:0006575 | cellular amino acid derivative metabolic process            | 68  | 12    | 0.000/0.001/0.001 | 0.023 (0.135)                                   | 0.622 (1.000)                                   |
| GO:0006613 | cotranslational protein targeting to membrane               | 21  | 4     | 0.000/0.001/0.001 | 0.127 (0.405)                                   | 0.019 (0.162)                                   |
| GO:0006614 | SRP-dependent cotranslational protein targeting to membrane | 19  | 4     | 0.001/0.001/0.001 | 0.095 (0.321)                                   | 0.163 (0.637)                                   |
| GO:0006769 | nicotinamide metabolic process                              | 47  | 13    | 0.000/0.001/0.001 | (0.003)                                         | 0.011 (0.109)                                   |
| GO:0006862 | nucleotide transport                                        | 11  | 1     | 0.001/0.001/0.002 | 0.662 (1.000)                                   | 0.348 (0.893)                                   |
| GO:0006915 | apoptosis                                                   | 23  | 5     | 0.001/0.001/0.001 | 0.058 (0.269)                                   | 0.633 (1.000)                                   |
| GO:0006972 | hyperosmotic response                                       | 12  | 1     | 0.001/0.001/0.002 | 0.693 (1.000)                                   | 0.557 (1.000)                                   |
| GO:0009064 | glutamine family amino acid metabolic process               | 57  | 20    | 0.001/0.001/0.002 | $8.38 \times 10^{-8}$ ( $2.24 \times 10^{-6}$ ) | (0.008)                                         |
| GO:0009267 | cellular response to starvation                             | 41  | 5     | 0.001/0.001/0.002 | 0.339 (0.680)                                   | 0.524 (0.986)                                   |
| GO:0009303 | rRNA transcription                                          | 14  | 1     | 0.001/0.001/0.002 | 0.748 (1.000)                                   | 0.410 (0.950)                                   |
| GO:0009415 | response to water                                           | 32  | 4     | 0.001/0.001/0.001 | 0.352 (0.703)                                   | 0.731 (1.000)                                   |
| GO:0009820 | alkaloid metabolic process                                  | 47  | 13    | 0.000/0.001/0.001 | (0.003)                                         | $4.45 \times 10^{-5}$ (0.002)                   |
| GO:0012501 | programmed cell death                                       | 25  | 5     | 0.001/0.001/0.001 | 0.078 (0.319)                                   | 1.000 (1.000)                                   |
| GO:0015918 | sterol transport                                            | 15  | 1     | 0.001/0.001/0.001 | 0.772 (1.000)                                   | 0.615 (1.000)                                   |
| GO:0016053 | organic acid biosynthetic process                           | 167 | 31    | 0.000/0.001/0.001 | (0.002)                                         | (0.009)                                         |
| GO:0016236 | macroautophagy                                              | 24  | 2     | 0.000/0.001/0.001 | 0.673 (1.000)                                   | 0.775 (1.000)                                   |
| GO:0018409 | peptide or protein aminoterminal blocking                   | 14  | 1     | 0.001/0.001/0.002 | 0.748 (1.000)                                   | 1.000 (1.000)                                   |
| GO:0019359 | nicotinamide nucleotide biosynthetic process                | 15  | 2     | 0.000/0.001/0.001 | 0.417 (0.788)                                   | 0.969 (1.000)                                   |
| GO:0019674 | NAD metabolic process                                       | 23  | 6     | 0.001/0.001/0.001 | 0.017 (0.103)                                   | 0.712 (1.000)                                   |
| GO:0019740 | nitrogen utilization                                        | 19  | 2     | 0.001/0.001/0.001 | 0.543 (0.939)                                   | 0.461 (0.967)                                   |
| GO:0022603 | regulation of anatomical structure morphogenesis            | 21  | 3     | 0.000/0.001/0.001 | 0.314 (0.655)                                   | 0.170 (0.647)                                   |
| GO:0022604 | regulation of cell morphogenesis                            | 18  | 3     | 0.001/0.001/0.002 | 0.235 (0.590)                                   | 0.060 (0.358)                                   |
| GO:0030001 | metal ion transport                                         | 76  | 13    | 0.001/0.001/0.002 | 0.023 (0.137)                                   | 0.996 (1.000)                                   |
| GO:0032258 | CVT pathway                                                 | 20  | 2     | 0.000/0.001/0.001 | 0.572 (0.983)                                   | 0.585 (1.000)                                   |
| GO:0032990 | cell part morphogenesis                                     | 12  | 1     | 0.000/0.001/0.001 | 0.693 (1.000)                                   | 0.275 (0.802)                                   |
| GO:0033108 | mitochondrial respiratory chain complex assembly            | 22  | 5     | 0.001/0.001/0.001 | 0.049 (0.231)                                   | 0.003 (0.046)                                   |
| GO:0034220 | ion transmembrane transport                                 | 40  | 17    | 0.001/0.001/0.001 | $2.92 \times 10^{-8}$ ( $8.56 \times 10^{-7}$ ) | 0.001 (0.027)                                   |
| GO:0034968 | histone lysine methylation                                  | 15  | 1     | 0.000/0.001/0.001 | 0.772 (1.000)                                   | 0.652 (1.000)                                   |
| GO:0042026 | protein refolding                                           | 16  | 1     | 0.001/0.001/0.001 | 0.793 (1.000)                                   | 0.552 (1.000)                                   |
| GO:0042594 | response to starvation                                      | 44  | 5     | 0.000/0.001/0.001 | 0.397 (0.754)                                   | 0.579 (1.000)                                   |
| GO:0043648 | dicarboxylic acid metabolic process                         | 23  | 8     | 0.001/0.001/0.001 | (0.008)                                         | 0.100 (0.499)                                   |
| GO:0044093 | positive regulation of molecular function                   | 24  | 2     | 0.001/0.001/0.001 | 0.673 (1.000)                                   | 0.632 (1.000)                                   |
| GO:0044264 | cellular polysaccharide metabolic process                   | 60  | 11    | 0.001/0.001/0.001 | 0.022 (0.132)                                   | 0.003 (0.042)                                   |
| GO:0046148 | pigment biosynthetic process                                | 25  | 3     | 0.001/0.001/0.001 | 0.420 (0.791)                                   | 0.388 (0.932)                                   |
| GO:0046364 | monosaccharide biosynthetic process                         | 58  | 10    | 0.001/0.001/0.002 | 0.041 (0.210)                                   | 0.916 (1.000)                                   |
| GO:0046394 | carboxylic acid biosynthetic process                        | 167 | 31    | 0.000/0.001/0.001 | (0.002)                                         | 0.931 (1.000)                                   |
| GO:0046496 | nicotinamide nucleotide metabolic process                   | 46  | 13    | 0.001/0.001/0.001 | (0.003)                                         | 0.388 (0.932)                                   |
| GO:0070584 | mitochondrion morphogenesis                                 | 12  | 1     | 0.000/0.001/0.001 | 0.693 (1.000)                                   | 0.584 (1.000)                                   |
| GO:0070925 | organelle assembly                                          | 13  | 1     | 0.000/0.001/0.001 | 0.722 (1.000)                                   | 0.378 (0.922)                                   |

Continued on Next Page...



Table 1 – Continued

| GO ID      | Name                                                                                                                                                | Pop | Study | MGSA              | TfT           | PCu           |
|------------|-----------------------------------------------------------------------------------------------------------------------------------------------------|-----|-------|-------------------|---------------|---------------|
| GO:0000001 | mitochondrion inheritance                                                                                                                           | 29  | 1     | 0.000/0.000/0.000 | 0.943 (1.000) | 0.460 (0.967) |
| GO:0000002 | mitochondrial genome maintenance                                                                                                                    | 38  | 2     | 0.000/0.000/0.000 | 0.884 (1.000) | 0.771 (1.000) |
| GO:0000003 | reproduction                                                                                                                                        | 337 | 14    | 0.000/0.000/0.000 | 1.000 (1.000) | 1.000 (1.000) |
| GO:0000018 | regulation of DNA recombination                                                                                                                     | 17  | 1     | 0.000/0.000/0.001 | 0.813 (1.000) | 0.383 (0.930) |
| GO:0000027 | ribosomal large subunit assembly                                                                                                                    | 42  | 1     | 0.000/0.000/0.000 | 0.984 (1.000) | 0.462 (0.967) |
| GO:0000070 | mitotic sister chromatid segregation                                                                                                                | 73  | 1     | 0.000/0.000/0.000 | 0.999 (1.000) | 0.617 (1.000) |
| GO:0000075 | cell cycle checkpoint                                                                                                                               | 59  | 1     | 0.000/0.000/0.000 | 0.997 (1.000) | 0.831 (1.000) |
| GO:0000079 | regulation of cyclin-dependent protein kinase activity                                                                                              | 20  | 1     | 0.000/0.000/0.000 | 0.861 (1.000) | 0.384 (0.930) |
| GO:0000087 | M phase of mitotic cell cycle                                                                                                                       | 204 | 3     | 0.000/0.000/0.000 | 1.000 (1.000) | 0.878 (1.000) |
| GO:0000122 | negative regulation of transcription from RNA polymerase II promoter                                                                                | 73  | 5     | 0.000/0.000/0.000 | 0.828 (1.000) | 0.079 (0.421) |
| GO:0000183 | chromatin silencing at rDNA                                                                                                                         | 20  | 1     | 0.000/0.000/0.000 | 0.861 (1.000) | 0.185 (0.665) |
| GO:0000184 | nuclear-transcribed mRNA catabolic process, nonsense-mediated decay                                                                                 | 32  | 2     | 0.000/0.000/0.000 | 0.816 (1.000) | 0.745 (1.000) |
| GO:0000209 | protein polyubiquitination                                                                                                                          | 20  | 3     | 0.000/0.000/0.000 | 0.287 (0.651) | 0.012 (0.120) |
| GO:0000278 | mitotic cell cycle                                                                                                                                  | 324 | 3     | 0.000/0.000/0.000 | 1.000 (1.000) | 0.978 (1.000) |
| GO:0000279 | M phase                                                                                                                                             | 343 | 9     | 0.000/0.000/0.000 | 1.000 (1.000) | 0.165 (0.642) |
| GO:0000280 | nuclear division                                                                                                                                    | 198 | 2     | 0.000/0.000/0.000 | 1.000 (1.000) | 1.000 (1.000) |
| GO:0000282 | cellular bud site selection                                                                                                                         | 63  | 1     | 0.000/0.000/0.000 | 0.998 (1.000) | 0.594 (1.000) |
| GO:0000288 | nuclear-transcribed mRNA catabolic process, deadenylation-dependent decay                                                                           | 43  | 3     | 0.000/0.000/0.000 | 0.782 (1.000) | 0.685 (1.000) |
| GO:0000375 | RNA splicing, via transesterification reactions                                                                                                     | 106 | 2     | 0.000/0.000/0.000 | 1.000 (1.000) | 0.664 (1.000) |
| GO:0000377 | RNA splicing, via transesterification reactions with bulged adenosine as nucleophile                                                                | 101 | 2     | 0.000/0.000/0.000 | 0.999 (1.000) | 0.907 (1.000) |
| GO:0000398 | nuclear mRNA splicing, via spliceosome                                                                                                              | 99  | 2     | 0.000/0.000/0.000 | 0.999 (1.000) | 0.701 (1.000) |
| GO:0000422 | mitochondrion degradation                                                                                                                           | 36  | 2     | 0.000/0.000/0.000 | 0.864 (1.000) | 0.932 (1.000) |
| GO:0000447 | endonucleolytic cleavage in ITS1 to separate SSU-rRNA from 5.8S rRNA and LSU-rRNA from tricistronic rRNA transcript (SSU-rRNA, 5.8S rRNA, LSU-rRNA) | 39  | 1     | 0.000/0.000/0.000 | 0.979 (1.000) | 0.696 (1.000) |
| GO:0000460 | maturation of 5.8S rRNA                                                                                                                             | 70  | 1     | 0.000/0.000/0.000 | 0.999 (1.000) | 0.952 (1.000) |
| GO:0000462 | maturation of SSU-rRNA from tricistronic rRNA transcript (SSU-rRNA, 5.8S rRNA, LSU-rRNA)                                                            | 89  | 3     | 0.000/0.000/0.000 | 0.992 (1.000) | 0.967 (1.000) |
| GO:0000466 | maturation of 5.8S rRNA from tricistronic rRNA transcript (SSU-rRNA, 5.8S rRNA, LSU-rRNA)                                                           | 70  | 1     | 0.000/0.000/0.000 | 0.999 (1.000) | 1.000 (1.000) |
| GO:0000469 | cleavages during rRNA processing                                                                                                                    | 60  | 1     | 0.000/0.000/0.000 | 0.997 (1.000) | 0.920 (1.000) |
| GO:0000478 | endonucleolytic cleavages during rRNA processing                                                                                                    | 41  | 1     | 0.000/0.000/0.000 | 0.983 (1.000) | 0.683 (1.000) |
| GO:0000479 | endonucleolytic cleavage of tricistronic rRNA transcript (SSU-rRNA, 5.8S rRNA, LSU-rRNA)                                                            | 41  | 1     | 0.000/0.000/0.000 | 0.983 (1.000) | 1.000 (1.000) |
| GO:0000746 | conjugation                                                                                                                                         | 110 | 4     | 0.000/0.000/0.000 | 0.994 (1.000) | 0.541 (1.000) |
| GO:0000747 | conjugation with cellular fusion                                                                                                                    | 106 | 3     | 0.000/0.000/0.000 | 0.998 (1.000) | 0.986 (1.000) |
| GO:0000749 | response to pheromone during conjugation with cellular fusion                                                                                       | 47  | 3     | 0.000/0.000/0.000 | 0.831 (1.000) | 0.146 (0.600) |

Continued on Next Page...

Table 1 – Continued

| GO ID      | Name                                                                                 | Pop  | Study | MGSA              | TfT                                               | PCu                                               |
|------------|--------------------------------------------------------------------------------------|------|-------|-------------------|---------------------------------------------------|---------------------------------------------------|
| GO:0000750 | pheromone-dependent signal transduction involved in conjugation with cellular fusion | 26   | 1     | 0.000/0.000/0.000 | 0.923 (1.000)                                     | 0.875 (1.000)                                     |
| GO:0000753 | cellular morphogenesis during conjugation with cellular fusion                       | 17   | 1     | 0.000/0.000/0.000 | 0.813 (1.000)                                     | 0.740 (1.000)                                     |
| GO:0000767 | cell morphogenesis during conjugation                                                | 18   | 1     | 0.000/0.000/0.000 | 0.830 (1.000)                                     | 0.330 (0.881)                                     |
| GO:0000819 | sister chromatid segregation                                                         | 78   | 1     | 0.000/0.000/0.000 | 1.000 (1.000)                                     | 0.781 (1.000)                                     |
| GO:0000902 | cell morphogenesis                                                                   | 145  | 3     | 0.000/0.000/0.000 | 1.000 (1.000)                                     | 0.970 (1.000)                                     |
| GO:0000910 | cytokinesis                                                                          | 113  | 1     | 0.000/0.000/0.000 | 1.000 (1.000)                                     | 0.842 (1.000)                                     |
| GO:0000956 | nuclear-transcribed mRNA catabolic process                                           | 84   | 6     | 0.000/0.000/0.000 | 0.813 (1.000)                                     | 0.929 (1.000)                                     |
| GO:0001300 | chronological cell aging                                                             | 23   | 4     | 0.000/0.000/0.000 | 0.163 (0.469)                                     | 0.235 (0.746)                                     |
| GO:0001302 | replicative cell aging                                                               | 44   | 5     | 0.000/0.000/0.000 | 0.397 (0.754)                                     | 0.701 (1.000)                                     |
| GO:0001403 | invasive growth in response to glucose limitation                                    | 48   | 3     | 0.000/0.000/0.000 | 0.841 (1.000)                                     | 0.219 (0.723)                                     |
| GO:0001510 | RNA methylation                                                                      | 29   | 2     | 0.000/0.000/0.000 | 0.770 (1.000)                                     | 0.154 (0.618)                                     |
| GO:0005975 | carbohydrate metabolic process                                                       | 320  | 65    | 0.000/0.000/0.000 | $5.33 \times 10^{-10}$ ( $1.88 \times 10^{-8}$ )  | $2.76 \times 10^{-11}$ ( $2.14 \times 10^{-9}$ )  |
| GO:0006082 | organic acid metabolic process                                                       | 390  | 84    | 0.000/0.000/0.000 | $2.97 \times 10^{-14}$ ( $1.70 \times 10^{-12}$ ) | $5.95 \times 10^{-15}$ ( $7.69 \times 10^{-13}$ ) |
| GO:0006139 | nucleobase, nucleoside, nucleotide and nucleic acid metabolic process                | 1655 | 103   | 0.000/0.000/0.000 | 1.000 (1.000)                                     | 1.000 (1.000)                                     |
| GO:0006163 | purine nucleotide metabolic process                                                  | 71   | 16    | 0.000/0.000/0.000 | (0.007)                                           | 0.516 (0.977)                                     |
| GO:0006164 | purine nucleotide biosynthetic process                                               | 67   | 16    | 0.000/0.000/0.000 | (0.004)                                           | 0.003 (0.046)                                     |
| GO:0006259 | DNA metabolic process                                                                | 389  | 6     | 0.000/0.000/0.000 | 1.000 (1.000)                                     | 1.000 (1.000)                                     |
| GO:0006260 | DNA replication                                                                      | 154  | 2     | 0.000/0.000/0.000 | 1.000 (1.000)                                     | 1.000 (1.000)                                     |
| GO:0006281 | DNA repair                                                                           | 240  | 1     | 0.000/0.000/0.000 | 1.000 (1.000)                                     | 0.996 (1.000)                                     |
| GO:0006310 | DNA recombination                                                                    | 115  | 4     | 0.000/0.000/0.000 | 0.996 (1.000)                                     | 0.066 (0.374)                                     |
| GO:0006312 | mitotic recombination                                                                | 37   | 1     | 0.000/0.000/0.000 | 0.974 (1.000)                                     | 0.794 (1.000)                                     |
| GO:0006323 | DNA packaging                                                                        | 67   | 1     | 0.000/0.000/0.000 | 0.999 (1.000)                                     | 0.998 (1.000)                                     |
| GO:0006325 | chromatin organization                                                               | 229  | 4     | 0.000/0.000/0.000 | 1.000 (1.000)                                     | 0.720 (1.000)                                     |
| GO:0006333 | chromatin assembly or disassembly                                                    | 79   | 2     | 0.000/0.000/0.000 | 0.996 (1.000)                                     | 0.428 (0.963)                                     |
| GO:0006334 | nucleosome assembly                                                                  | 27   | 1     | 0.000/0.000/0.000 | 0.930 (1.000)                                     | 0.235 (0.746)                                     |
| GO:0006342 | chromatin silencing                                                                  | 108  | 1     | 0.000/0.000/0.000 | 1.000 (1.000)                                     | 0.996 (1.000)                                     |
| GO:0006350 | transcription                                                                        | 686  | 25    | 0.000/0.000/0.000 | 1.000 (1.000)                                     | 1.000 (1.000)                                     |
| GO:0006351 | transcription, DNA-dependent                                                         | 574  | 21    | 0.000/0.000/0.000 | 1.000 (1.000)                                     | 0.612 (1.000)                                     |
| GO:0006352 | transcription initiation                                                             | 67   | 2     | 0.000/0.000/0.000 | 0.989 (1.000)                                     | 0.725 (1.000)                                     |
| GO:0006355 | regulation of transcription, DNA-dependent                                           | 425  | 20    | 0.000/0.000/0.000 | 1.000 (1.000)                                     | 0.020 (0.170)                                     |
| GO:0006357 | regulation of transcription from RNA polymerase II promoter                          | 236  | 14    | 0.000/0.000/0.000 | 0.981 (1.000)                                     | 0.019 (0.161)                                     |
| GO:0006360 | transcription from RNA polymerase I promoter                                         | 49   | 1     | 0.000/0.000/0.000 | 0.992 (1.000)                                     | 0.852 (1.000)                                     |
| GO:0006364 | rRNA processing                                                                      | 249  | 9     | 0.000/0.000/0.000 | 1.000 (1.000)                                     | 0.021 (0.170)                                     |
| GO:0006366 | transcription from RNA polymerase II promoter                                        | 356  | 15    | 0.000/0.000/0.000 | 1.000 (1.000)                                     | 0.253 (0.767)                                     |
| GO:0006367 | transcription initiation from RNA polymerase II promoter                             | 47   | 1     | 0.000/0.000/0.000 | 0.990 (1.000)                                     | 0.875 (1.000)                                     |
| GO:0006396 | RNA processing                                                                       | 512  | 11    | 0.000/0.000/0.000 | 1.000 (1.000)                                     | 1.000 (1.000)                                     |
| GO:0006397 | mRNA processing                                                                      | 194  | 4     | 0.000/0.000/0.000 | 1.000 (1.000)                                     | 0.830 (1.000)                                     |
| GO:0006399 | tRNA metabolic process                                                               | 167  | 3     | 0.000/0.000/0.000 | 1.000 (1.000)                                     | 0.957 (1.000)                                     |
| GO:0006401 | RNA catabolic process                                                                | 99   | 6     | 0.000/0.000/0.000 | 0.913 (1.000)                                     | 0.322 (0.872)                                     |
| GO:0006402 | mRNA catabolic process                                                               | 85   | 6     | 0.000/0.000/0.000 | 0.821 (1.000)                                     | 0.029 (0.216)                                     |
| GO:0006403 | RNA localization                                                                     | 133  | 3     | 0.000/0.000/0.000 | 1.000 (1.000)                                     | 0.853 (1.000)                                     |
| GO:0006405 | RNA export from nucleus                                                              | 96   | 3     | 0.000/0.000/0.000 | 0.996 (1.000)                                     | 0.287 (0.813)                                     |
| GO:0006406 | mRNA export from nucleus                                                             | 69   | 1     | 0.000/0.000/0.000 | 0.999 (1.000)                                     | 0.948 (1.000)                                     |
| GO:0006409 | tRNA export from nucleus                                                             | 32   | 2     | 0.000/0.000/0.000 | 0.816 (1.000)                                     | 0.243 (0.756)                                     |
| GO:0006412 | translation                                                                          | 705  | 80    | 0.000/0.000/0.000 | 0.033 (0.180)                                     | $8.17 \times 10^{-9}$ ( $4.32 \times 10^{-7}$ )   |
| GO:0006413 | translational initiation                                                             | 49   | 2     | 0.000/0.000/0.000 | 0.952 (1.000)                                     | 0.933 (1.000)                                     |
| GO:0006414 | translational elongation                                                             | 314  | 46    | 0.000/0.000/0.000 | 0.001 (0.011)                                     | $9.77 \times 10^{-7}$ ( $4.21 \times 10^{-5}$ )   |

Continued on Next Page...

Table 1 – Continued

| GO ID      | Name                                                 | Pop | Study | MGSA              | TfT                                               | PCu                                             |
|------------|------------------------------------------------------|-----|-------|-------------------|---------------------------------------------------|-------------------------------------------------|
| GO:0006415 | translational termination                            | 30  | 2     | 0.000/0.000/0.000 | 0.787 (1.000)                                     | 0.857 (1.000)                                   |
| GO:0006417 | regulation of translation                            | 183 | 14    | 0.000/0.000/0.000 | 0.827 (1.000)                                     | 0.603 (1.000)                                   |
| GO:0006418 | tRNA aminoacylation for protein translation          | 37  | 1     | 0.000/0.000/0.000 | 0.974 (1.000)                                     | 0.990 (1.000)                                   |
| GO:0006457 | protein folding                                      | 110 | 5     | 0.000/0.000/0.000 | 0.982 (1.000)                                     | 0.955 (1.000)                                   |
| GO:0006461 | protein complex assembly                             | 190 | 13    | 0.000/0.000/0.000 | 0.916 (1.000)                                     | 0.005 (0.060)                                   |
| GO:0006464 | protein modification process                         | 611 | 21    | 0.000/0.000/0.000 | 1.000 (1.000)                                     | 1.000 (1.000)                                   |
| GO:0006468 | protein amino acid phosphorylation                   | 134 | 5     | 0.000/0.000/0.000 | 0.997 (1.000)                                     | 0.998 (1.000)                                   |
| GO:0006473 | protein amino acid acetylation                       | 53  | 2     | 0.000/0.000/0.000 | 0.965 (1.000)                                     | 0.892 (1.000)                                   |
| GO:0006479 | protein amino acid methylation                       | 35  | 1     | 0.000/0.000/0.000 | 0.968 (1.000)                                     | 0.918 (1.000)                                   |
| GO:0006486 | protein amino acid glycosylation                     | 69  | 3     | 0.000/0.000/0.000 | 0.964 (1.000)                                     | 0.968 (1.000)                                   |
| GO:0006487 | protein amino acid N-linked glycosylation            | 46  | 3     | 0.000/0.000/0.000 | 0.819 (1.000)                                     | 0.290 (0.817)                                   |
| GO:0006497 | protein amino acid lipidation                        | 53  | 2     | 0.000/0.000/0.000 | 0.965 (1.000)                                     | 0.559 (1.000)                                   |
| GO:0006505 | GPI anchor metabolic process                         | 30  | 1     | 0.000/0.000/0.000 | 0.948 (1.000)                                     | 0.612 (1.000)                                   |
| GO:0006506 | GPI anchor biosynthetic process                      | 29  | 1     | 0.000/0.000/0.000 | 0.943 (1.000)                                     | 0.763 (1.000)                                   |
| GO:0006508 | proteolysis                                          | 332 | 15    | 0.000/0.000/0.000 | 1.000 (1.000)                                     | 1.000 (1.000)                                   |
| GO:0006511 | ubiquitin-dependent protein catabolic process        | 185 | 3     | 0.000/0.000/0.000 | 1.000 (1.000)                                     | 0.979 (1.000)                                   |
| GO:0006513 | protein monoubiquitination                           | 19  | 2     | 0.000/0.000/0.000 | 0.543 (0.939)                                     | 0.127 (0.564)                                   |
| GO:0006519 | cellular amino acid and derivative metabolic process | 301 | 55    | 0.000/0.000/0.000 | $5.64 \times 10^{-7}$ ( $1.26 \times 10^{-5}$ )   | $2.97 \times 10^{-7}$ ( $1.44 \times 10^{-5}$ ) |
| GO:0006520 | cellular amino acid metabolic process                | 235 | 43    | 0.000/0.000/0.000 | $1.02 \times 10^{-5}$ ()                          | 0.938 (1.000)                                   |
| GO:0006541 | glutamine metabolic process                          | 23  | 2     | 0.000/0.000/0.000 | 0.649 (1.000)                                     | 1.000 (1.000)                                   |
| GO:0006605 | protein targeting                                    | 238 | 11    | 0.000/0.000/0.000 | 0.998 (1.000)                                     | 0.127 (0.564)                                   |
| GO:0006606 | protein import into nucleus                          | 60  | 1     | 0.000/0.000/0.000 | 0.997 (1.000)                                     | 0.961 (1.000)                                   |
| GO:0006612 | protein targeting to membrane                        | 54  | 4     | 0.000/0.000/0.000 | 0.759 (1.000)                                     | 0.221 (0.726)                                   |
| GO:0006623 | protein targeting to vacuole                         | 65  | 4     | 0.000/0.000/0.000 | 0.871 (1.000)                                     | 0.215 (0.723)                                   |
| GO:0006625 | protein targeting to peroxisome                      | 22  | 2     | 0.000/0.000/0.000 | 0.625 (1.000)                                     | 0.372 (0.917)                                   |
| GO:0006626 | protein targeting to mitochondrion                   | 51  | 2     | 0.000/0.000/0.000 | 0.959 (1.000)                                     | 0.892 (1.000)                                   |
| GO:0006629 | lipid metabolic process                              | 275 | 26    | 0.000/0.000/0.000 | 0.513 (0.905)                                     | 0.423 (0.961)                                   |
| GO:0006643 | membrane lipid metabolic process                     | 33  | 1     | 0.000/0.000/0.000 | 0.962 (1.000)                                     | 0.972 (1.000)                                   |
| GO:0006644 | phospholipid metabolic process                       | 112 | 8     | 0.000/0.000/0.000 | 0.837 (1.000)                                     | 0.963 (1.000)                                   |
| GO:0006650 | glycerophospholipid metabolic process                | 78  | 5     | 0.000/0.000/0.000 | 0.868 (1.000)                                     | 0.748 (1.000)                                   |
| GO:0006665 | sphingolipid metabolic process                       | 33  | 1     | 0.000/0.000/0.000 | 0.962 (1.000)                                     | 1.000 (1.000)                                   |
| GO:0006725 | cellular aromatic compound metabolic process         | 140 | 16    | 0.000/0.000/0.000 | 0.236 (0.593)                                     | 0.238 (0.748)                                   |
| GO:0006730 | one-carbon metabolic process                         | 86  | 4     | 0.000/0.000/0.000 | 0.967 (1.000)                                     | 0.968 (1.000)                                   |
| GO:0006732 | coenzyme metabolic process                           | 144 | 41    | 0.000/0.000/0.000 | $2.60 \times 10^{-11}$ ( $9.76 \times 10^{-10}$ ) | 0.552 (1.000)                                   |
| GO:0006733 | oxidoreduction coenzyme metabolic process            | 60  | 13    | 0.000/0.000/0.000 | 0.003 (0.025)                                     | 0.958 (1.000)                                   |
| GO:0006752 | group transfer coenzyme metabolic process            | 30  | 1     | 0.000/0.000/0.000 | 0.948 (1.000)                                     | 1.000 (1.000)                                   |
| GO:0006753 | nucleoside phosphate metabolic process               | 196 | 53    | 0.000/0.000/0.000 | $2.57 \times 10^{-13}$ ( $1.08 \times 10^{-11}$ ) | 0.021 (0.170)                                   |
| GO:0006754 | ATP biosynthetic process                             | 39  | 14    | 0.000/0.000/0.000 | $5.59 \times 10^{-6}$ ()                          | 0.428 (0.963)                                   |
| GO:0006766 | vitamin metabolic process                            | 89  | 19    | 0.000/0.000/0.000 | (0.005)                                           | (0.011)                                         |
| GO:0006767 | water-soluble vitamin metabolic process              | 86  | 18    | 0.000/0.000/0.000 | (0.008)                                           | 0.886 (1.000)                                   |

Continued on Next Page...

Table 1 – Continued

| GO ID      | Name                                           | Pop  | Study | MGSA              | TfT                                               | PCu                                               |
|------------|------------------------------------------------|------|-------|-------------------|---------------------------------------------------|---------------------------------------------------|
| GO:0006793 | phosphorus metabolic process                   | 300  | 53    | 0.000/0.000/0.000 | $2.71 \times 10^{-6}$ ( $5.51 \times 10^{-5}$ )   | $1.88 \times 10^{-6}$ ( $7.30 \times 10^{-5}$ )   |
| GO:0006796 | phosphate metabolic process                    | 295  | 48    | 0.000/0.000/0.000 | $7.66 \times 10^{-5}$ (0.001)                     | 1.000 (1.000)                                     |
| GO:0006807 | nitrogen compound metabolic process            | 1910 | 154   | 0.000/0.000/0.000 | 0.994 (1.000)                                     | 1.000 (1.000)                                     |
| GO:0006810 | transport                                      | 1241 | 119   | 0.000/0.000/0.000 | 0.401 (0.762)                                     | 0.132 (0.571)                                     |
| GO:0006811 | ion transport                                  | 187  | 60    | 0.000/0.000/0.000 | $6.58 \times 10^{-19}$ ( $1.13 \times 10^{-16}$ ) | $2.68 \times 10^{-22}$ ( $7.80 \times 10^{-20}$ ) |
| GO:0006812 | cation transport                               | 122  | 30    | 0.000/0.000/0.000 | $4.86 \times 10^{-7}$ ( $1.14 \times 10^{-5}$ )   | 0.999 (1.000)                                     |
| GO:0006818 | hydrogen transport                             | 33   | 14    | 0.000/0.000/0.001 | $5.16 \times 10^{-7}$ ( $1.17 \times 10^{-5}$ )   | $4.52 \times 10^{-7}$ ( $2.11 \times 10^{-5}$ )   |
| GO:0006839 | mitochondrial transport                        | 66   | 7     | 0.000/0.000/0.000 | 0.425 (0.799)                                     | 0.005 (0.057)                                     |
| GO:0006865 | amino acid transport                           | 45   | 5     | 0.000/0.000/0.000 | 0.416 (0.788)                                     | 0.953 (1.000)                                     |
| GO:0006869 | lipid transport                                | 40   | 2     | 0.000/0.000/0.000 | 0.901 (1.000)                                     | 0.910 (1.000)                                     |
| GO:0006873 | cellular ion homeostasis                       | 116  | 11    | 0.000/0.000/0.000 | 0.531 (0.931)                                     | 0.045 (0.300)                                     |
| GO:0006886 | intracellular protein transport                | 324  | 12    | 0.000/0.000/0.000 | 1.000 (1.000)                                     | 0.529 (0.993)                                     |
| GO:0006888 | ER to Golgi vesicle-mediated transport         | 87   | 1     | 0.000/0.000/0.000 | 1.000 (1.000)                                     | 0.483 (0.973)                                     |
| GO:0006897 | endocytosis                                    | 97   | 3     | 0.000/0.000/0.000 | 0.996 (1.000)                                     | 0.229 (0.745)                                     |
| GO:0006906 | vesicle fusion                                 | 35   | 1     | 0.000/0.000/0.000 | 0.968 (1.000)                                     | 0.506 (0.974)                                     |
| GO:0006913 | nucleocytoplasmic transport                    | 154  | 5     | 0.000/0.000/0.000 | 0.999 (1.000)                                     | 1.000 (1.000)                                     |
| GO:0006914 | autophagy                                      | 135  | 14    | 0.000/0.000/0.000 | 0.386 (0.747)                                     | 0.886 (1.000)                                     |
| GO:0006944 | membrane fusion                                | 71   | 4     | 0.000/0.000/0.000 | 0.911 (1.000)                                     | 0.423 (0.961)                                     |
| GO:0006950 | response to stress                             | 765  | 86    | 0.000/0.000/0.000 | 0.034 (0.181)                                     | 0.191 (0.674)                                     |
| GO:0006970 | response to osmotic stress                     | 97   | 6     | 0.000/0.000/0.000 | 0.903 (1.000)                                     | 0.976 (1.000)                                     |
| GO:0006974 | response to DNA damage stimulus                | 282  | 2     | 0.000/0.000/0.000 | 1.000 (1.000)                                     | 1.000 (1.000)                                     |
| GO:0006979 | response to oxidative stress                   | 82   | 17    | 0.000/0.000/0.000 | 0.001 (0.012)                                     | 0.003 (0.046)                                     |
| GO:0006984 | ER-nuclear signaling pathway                   | 84   | 3     | 0.000/0.000/0.000 | 0.988 (1.000)                                     | 0.480 (0.973)                                     |
| GO:0006986 | response to unfolded protein                   | 31   | 2     | 0.000/0.000/0.000 | 0.802 (1.000)                                     | 0.881 (1.000)                                     |
| GO:0006996 | organelle organization                         | 1103 | 38    | 0.000/0.000/0.000 | 1.000 (1.000)                                     | 1.000 (1.000)                                     |
| GO:0006997 | nucleus organization                           | 69   | 1     | 0.000/0.000/0.000 | 0.999 (1.000)                                     | 0.918 (1.000)                                     |
| GO:0007005 | mitochondrion organization                     | 275  | 19    | 0.000/0.000/0.000 | 0.944 (1.000)                                     | (0.013)                                           |
| GO:0007006 | mitochondrial membrane organization            | 32   | 4     | 0.000/0.000/0.000 | 0.352 (0.703)                                     | 0.088 (0.459)                                     |
| GO:0007010 | cytoskeleton organization                      | 223  | 1     | 0.000/0.000/0.000 | 1.000 (1.000)                                     | 1.000 (1.000)                                     |
| GO:0007031 | peroxisome organization                        | 47   | 6     | 0.000/0.000/0.000 | 0.275 (0.628)                                     | 0.004 (0.054)                                     |
| GO:0007033 | vacuole organization                           | 46   | 3     | 0.000/0.000/0.000 | 0.819 (1.000)                                     | 0.208 (0.723)                                     |
| GO:0007034 | vacuolar transport                             | 118  | 4     | 0.000/0.000/0.000 | 0.997 (1.000)                                     | 0.616 (1.000)                                     |
| GO:0007047 | cell wall organization                         | 216  | 18    | 0.000/0.000/0.000 | 0.738 (1.000)                                     | 0.569 (1.000)                                     |
| GO:0007049 | cell cycle                                     | 620  | 11    | 0.000/0.000/0.000 | 1.000 (1.000)                                     | 1.000 (1.000)                                     |
| GO:0007059 | chromosome segregation                         | 157  | 2     | 0.000/0.000/0.000 | 1.000 (1.000)                                     | 1.000 (1.000)                                     |
| GO:0007062 | sister chromatid cohesion                      | 35   | 1     | 0.000/0.000/0.000 | 0.968 (1.000)                                     | 0.483 (0.973)                                     |
| GO:0007064 | mitotic sister chromatid cohesion              | 28   | 1     | 0.000/0.000/0.000 | 0.937 (1.000)                                     | 0.350 (0.893)                                     |
| GO:0007067 | mitosis                                        | 188  | 2     | 0.000/0.000/0.000 | 1.000 (1.000)                                     | 0.962 (1.000)                                     |
| GO:0007088 | regulation of mitosis                          | 32   | 1     | 0.000/0.000/0.000 | 0.958 (1.000)                                     | 0.438 (0.966)                                     |
| GO:0007091 | mitotic metaphase/anaphase transition          | 33   | 1     | 0.000/0.000/0.000 | 0.962 (1.000)                                     | 0.451 (0.967)                                     |
| GO:0007093 | mitotic cell cycle checkpoint                  | 31   | 1     | 0.000/0.000/0.000 | 0.953 (1.000)                                     | 0.501 (0.973)                                     |
| GO:0007094 | mitotic cell cycle spindle assembly checkpoint | 20   | 1     | 0.000/0.000/0.000 | 0.861 (1.000)                                     | 0.606 (1.000)                                     |
| GO:0007096 | regulation of exit from mitosis                | 27   | 1     | 0.000/0.000/0.000 | 0.930 (1.000)                                     | 0.586 (1.000)                                     |
| GO:0007105 | cytokinesis, site selection                    | 63   | 1     | 0.000/0.000/0.000 | 0.998 (1.000)                                     | 0.685 (1.000)                                     |
| GO:0007114 | cell budding                                   | 85   | 1     | 0.000/0.000/0.000 | 1.000 (1.000)                                     | 0.998 (1.000)                                     |
| GO:0007120 | axial cellular bud site selection              | 19   | 1     | 0.000/0.000/0.000 | 0.846 (1.000)                                     | 0.181 (0.659)                                     |
| GO:0007126 | meiosis                                        | 166  | 8     | 0.000/0.000/0.000 | 0.991 (1.000)                                     | 0.003 (0.046)                                     |
| GO:0007127 | meiosis I                                      | 69   | 3     | 0.000/0.000/0.000 | 0.964 (1.000)                                     | 0.173 (0.652)                                     |
| GO:0007131 | reciprocal meiotic recombination               | 41   | 3     | 0.000/0.000/0.000 | 0.753 (1.000)                                     | 0.030 (0.223)                                     |
| GO:0007154 | cell communication                             | 434  | 24    | 0.000/0.000/0.000 | 0.999 (1.000)                                     | 0.996 (1.000)                                     |
| GO:0007163 | establishment or maintenance of cell polarity  | 115  | 1     | 0.000/0.000/0.000 | 1.000 (1.000)                                     | 1.000 (1.000)                                     |
| GO:0007165 | signal transduction                            | 371  | 15    | 0.000/0.000/0.000 | 1.000 (1.000)                                     | 0.955 (1.000)                                     |

Continued on Next Page...

Table 1 – Continued

| GO ID      | Name                                                 | Pop  | Study | MGSA              | TfT                                               | PCu           |
|------------|------------------------------------------------------|------|-------|-------------------|---------------------------------------------------|---------------|
| GO:0007166 | cell surface receptor linked signal transduction     | 50   | 1     | 0.000/0.000/0.000 | 0.993 (1.000)                                     | 0.891 (1.000) |
| GO:0007186 | G-protein coupled receptor protein signaling pathway | 32   | 1     | 0.000/0.000/0.000 | 0.958 (1.000)                                     | 0.640 (1.000) |
| GO:0007242 | intracellular signaling cascade                      | 269  | 8     | 0.000/0.000/0.000 | 1.000 (1.000)                                     | 0.972 (1.000) |
| GO:0007264 | small GTPase mediated signal transduction            | 106  | 4     | 0.000/0.000/0.000 | 0.992 (1.000)                                     | 0.391 (0.934) |
| GO:0007265 | Ras protein signal transduction                      | 63   | 3     | 0.000/0.000/0.000 | 0.943 (1.000)                                     | 0.464 (0.967) |
| GO:0007266 | Rho protein signal transduction                      | 22   | 2     | 0.000/0.000/0.000 | 0.625 (1.000)                                     | 0.277 (0.805) |
| GO:0007346 | regulation of mitotic cell cycle                     | 79   | 2     | 0.000/0.000/0.000 | 0.996 (1.000)                                     | 0.282 (0.809) |
| GO:0007568 | aging                                                | 71   | 8     | 0.000/0.000/0.000 | 0.347 (0.694)                                     | 0.126 (0.564) |
| GO:0007569 | cell aging                                           | 61   | 7     | 0.000/0.000/0.000 | 0.346 (0.693)                                     | 0.271 (0.795) |
| GO:0008033 | tRNA processing                                      | 104  | 2     | 0.000/0.000/0.000 | 1.000 (1.000)                                     | 0.840 (1.000) |
| GO:0008104 | protein localization                                 | 589  | 18    | 0.000/0.000/0.000 | 1.000 (1.000)                                     | 0.895 (1.000) |
| GO:0008150 | biological_process                                   | 5206 | 488   | 0.000/0.000/0.000 | 1.000 (1.000)                                     | 1.000 (1.000) |
| GO:0008152 | metabolic process                                    | 3572 | 344   | 0.000/0.000/0.000 | 0.188 (0.485)                                     | 0.188 (0.670) |
| GO:0008202 | steroid metabolic process                            | 50   | 3     | 0.000/0.000/0.000 | 0.861 (1.000)                                     | 0.852 (1.000) |
| GO:0008213 | protein amino acid alkylation                        | 35   | 1     | 0.000/0.000/0.000 | 0.968 (1.000)                                     | 0.648 (1.000) |
| GO:0008361 | regulation of cell size                              | 108  | 1     | 0.000/0.000/0.000 | 1.000 (1.000)                                     | 0.915 (1.000) |
| GO:0008380 | RNA splicing                                         | 130  | 2     | 0.000/0.000/0.000 | 1.000 (1.000)                                     | 0.814 (1.000) |
| GO:0008610 | lipid biosynthetic process                           | 152  | 7     | 0.000/0.000/0.000 | 0.991 (1.000)                                     | 0.991 (1.000) |
| GO:0008654 | phospholipid biosynthetic process                    | 69   | 6     | 0.000/0.000/0.000 | 0.638 (1.000)                                     | 0.576 (1.000) |
| GO:0009056 | catabolic process                                    | 857  | 111   | 0.000/0.000/0.000 | $9.57 \times 10^{-5}$ (0.001)                     | (0.004)       |
| GO:0009057 | macromolecule catabolic process                      | 603  | 59    | 0.000/0.000/0.000 | 0.379 (0.747)                                     | 0.025 (0.197) |
| GO:0009058 | biosynthetic process                                 | 2017 | 179   | 0.000/0.000/0.000 | 0.849 (1.000)                                     | 0.964 (1.000) |
| GO:0009059 | macromolecule biosynthetic process                   | 1598 | 119   | 0.000/0.000/0.000 | 0.999 (1.000)                                     | 0.728 (1.000) |
| GO:0009066 | aspartate family amino acid metabolic process        | 61   | 10    | 0.000/0.000/0.001 | 0.055 (0.260)                                     | 0.735 (1.000) |
| GO:0009100 | glycoprotein metabolic process                       | 75   | 4     | 0.000/0.000/0.000 | 0.931 (1.000)                                     | 0.758 (1.000) |
| GO:0009101 | glycoprotein biosynthetic process                    | 74   | 4     | 0.000/0.000/0.000 | 0.926 (1.000)                                     | 0.818 (1.000) |
| GO:0009108 | coenzyme biosynthetic process                        | 68   | 4     | 0.000/0.000/0.000 | 0.893 (1.000)                                     | 1.000 (1.000) |
| GO:0009110 | vitamin biosynthetic process                         | 49   | 3     | 0.000/0.000/0.000 | 0.851 (1.000)                                     | 0.851 (1.000) |
| GO:0009112 | nucleobase metabolic process                         | 38   | 2     | 0.000/0.000/0.000 | 0.884 (1.000)                                     | 0.999 (1.000) |
| GO:0009117 | nucleotide metabolic process                         | 196  | 53    | 0.000/0.000/0.000 | $2.57 \times 10^{-13}$ ( $1.08 \times 10^{-11}$ ) | 1.000 (1.000) |
| GO:0009123 | nucleoside monophosphate metabolic process           | 36   | 1     | 0.000/0.000/0.000 | 0.971 (1.000)                                     | 1.000 (1.000) |
| GO:0009124 | nucleoside monophosphate biosynthetic process        | 31   | 1     | 0.000/0.000/0.000 | 0.953 (1.000)                                     | 0.998 (1.000) |
| GO:0009126 | purine nucleoside monophosphate metabolic process    | 21   | 1     | 0.000/0.000/0.000 | 0.874 (1.000)                                     | 0.996 (1.000) |
| GO:0009127 | purine nucleoside monophosphate biosynthetic process | 18   | 1     | 0.000/0.000/0.000 | 0.830 (1.000)                                     | 0.991 (1.000) |
| GO:0009141 | nucleoside triphosphate metabolic process            | 48   | 14    | 0.000/0.000/0.000 | $8.08 \times 10^{-5}$ (0.001)                     | 0.417 (0.953) |
| GO:0009142 | nucleoside triphosphate biosynthetic process         | 44   | 14    | 0.000/0.000/0.000 | $2.74 \times 10^{-5}$ ()                          | (0.008)       |
| GO:0009144 | purine nucleoside triphosphate metabolic process     | 41   | 14    | 0.000/0.000/0.000 | $1.09 \times 10^{-5}$ ()                          | 0.002 (0.027) |
| GO:0009145 | purine nucleoside triphosphate biosynthetic process  | 40   | 14    | 0.000/0.000/0.000 | $7.88 \times 10^{-6}$ ()                          | 0.003 (0.044) |
| GO:0009150 | purine ribonucleotide metabolic process              | 61   | 15    | 0.000/0.000/0.000 | (0.004)                                           | 0.048 (0.311) |
| GO:0009152 | purine ribonucleotide biosynthetic process           | 57   | 15    | 0.000/0.000/0.000 | (0.002)                                           | 0.021 (0.170) |
| GO:0009156 | ribonucleoside monophosphate biosynthetic process    | 25   | 1     | 0.000/0.000/0.000 | 0.915 (1.000)                                     | 0.999 (1.000) |

Continued on Next Page...

Table 1 – Continued

| GO ID      | Name                                                                      | Pop  | Study | MGSA              | TfT                                              | PCu                                              |
|------------|---------------------------------------------------------------------------|------|-------|-------------------|--------------------------------------------------|--------------------------------------------------|
| GO:0009161 | ribonucleoside monophosphate metabolic process                            | 28   | 1     | 0.000/0.000/0.000 | 0.937 (1.000)                                    | 0.999 (1.000)                                    |
| GO:0009165 | nucleotide biosynthetic process                                           | 110  | 18    | 0.000/0.000/0.000 | 0.013 (0.083)                                    | 0.021 (0.172)                                    |
| GO:0009167 | purine ribonucleoside monophosphate metabolic process                     | 20   | 1     | 0.000/0.000/0.000 | 0.861 (1.000)                                    | 0.997 (1.000)                                    |
| GO:0009168 | purine ribonucleoside monophosphate biosynthetic process                  | 17   | 1     | 0.000/0.000/0.000 | 0.813 (1.000)                                    | 0.992 (1.000)                                    |
| GO:0009199 | ribonucleoside triphosphate metabolic process                             | 43   | 14    | 0.000/0.000/0.000 | $2.04 \times 10^{-5}$ ()                         | (0.019)                                          |
| GO:0009201 | ribonucleoside triphosphate biosynthetic process                          | 42   | 14    | 0.000/0.000/0.000 | $1.50 \times 10^{-5}$ ()                         | 0.002 (0.034)                                    |
| GO:0009205 | purine ribonucleoside triphosphate metabolic process                      | 41   | 14    | 0.000/0.000/0.000 | $1.09 \times 10^{-5}$ ()                         | 0.007 (0.081)                                    |
| GO:0009206 | purine ribonucleoside triphosphate biosynthetic process                   | 40   | 14    | 0.000/0.000/0.000 | $7.88 \times 10^{-6}$ ()                         | 0.009 (0.101)                                    |
| GO:0009259 | ribonucleotide metabolic process                                          | 71   | 15    | 0.000/0.000/0.000 | 0.002 (0.018)                                    | 0.944 (1.000)                                    |
| GO:0009260 | ribonucleotide biosynthetic process                                       | 67   | 15    | 0.000/0.000/0.000 | 0.001 (0.010)                                    | 0.019 (0.166)                                    |
| GO:0009272 | fungus-type cell wall biogenesis                                          | 38   | 4     | 0.000/0.000/0.000 | 0.483 (0.878)                                    | 0.633 (1.000)                                    |
| GO:0009308 | amine metabolic process                                                   | 289  | 52    | 0.000/0.000/0.000 | $1.92 \times 10^{-6}$ ( $4.12 \times 10^{-5}$ )  | $1.15 \times 10^{-9}$ ( $6.67 \times 10^{-8}$ )  |
| GO:0009451 | RNA modification                                                          | 126  | 3     | 0.000/0.000/0.000 | 1.000 (1.000)                                    | 0.842 (1.000)                                    |
| GO:0009607 | response to biotic stimulus                                               | 37   | 2     | 0.000/0.000/0.000 | 0.874 (1.000)                                    | 0.920 (1.000)                                    |
| GO:0009628 | response to abiotic stimulus                                              | 328  | 66    | 0.000/0.000/0.000 | $5.87 \times 10^{-10}$ ( $2.02 \times 10^{-8}$ ) | $1.25 \times 10^{-10}$ ( $9.13 \times 10^{-9}$ ) |
| GO:0009653 | anatomical structure morphogenesis                                        | 329  | 23    | 0.000/0.000/0.000 | 0.953 (1.000)                                    | 0.779 (1.000)                                    |
| GO:0009889 | regulation of biosynthetic process                                        | 847  | 41    | 0.000/0.000/0.000 | 1.000 (1.000)                                    | 1.000 (1.000)                                    |
| GO:0009890 | negative regulation of biosynthetic process                               | 237  | 8     | 0.000/0.000/0.000 | 1.000 (1.000)                                    | 1.000 (1.000)                                    |
| GO:0009891 | positive regulation of biosynthetic process                               | 180  | 7     | 0.000/0.000/0.000 | 0.999 (1.000)                                    | 0.998 (1.000)                                    |
| GO:0009892 | negative regulation of metabolic process                                  | 283  | 10    | 0.000/0.000/0.000 | 1.000 (1.000)                                    | 1.000 (1.000)                                    |
| GO:0009893 | positive regulation of metabolic process                                  | 197  | 7     | 0.000/0.000/0.000 | 1.000 (1.000)                                    | 1.000 (1.000)                                    |
| GO:0009894 | regulation of catabolic process                                           | 60   | 9     | 0.000/0.000/0.000 | 0.105 (0.339)                                    | 0.079 (0.420)                                    |
| GO:0009966 | regulation of signal transduction                                         | 121  | 1     | 0.000/0.000/0.000 | 1.000 (1.000)                                    | 0.998 (1.000)                                    |
| GO:0009987 | cellular process                                                          | 4323 | 373   | 0.000/0.000/0.000 | 1.000 (1.000)                                    | 1.000 (1.000)                                    |
| GO:0010033 | response to organic substance                                             | 146  | 9     | 0.000/0.000/0.000 | 0.940 (1.000)                                    | 0.997 (1.000)                                    |
| GO:0010035 | response to inorganic substance                                           | 30   | 4     | 0.000/0.000/0.000 | 0.308 (0.655)                                    | 0.458 (0.967)                                    |
| GO:0010038 | response to metal ion                                                     | 20   | 4     | 0.000/0.000/0.001 | 0.111 (0.358)                                    | 0.177 (0.654)                                    |
| GO:0010324 | membrane invagination                                                     | 136  | 5     | 0.000/0.000/0.000 | 0.997 (1.000)                                    | 0.853 (1.000)                                    |
| GO:0010458 | exit from mitosis                                                         | 28   | 1     | 0.000/0.000/0.000 | 0.937 (1.000)                                    | 0.397 (0.938)                                    |
| GO:0010467 | gene expression                                                           | 1750 | 114   | 0.000/0.000/0.000 | 1.000 (1.000)                                    | 0.756 (1.000)                                    |
| GO:0010468 | regulation of gene expression                                             | 815  | 38    | 0.000/0.000/0.000 | 1.000 (1.000)                                    | 0.999 (1.000)                                    |
| GO:0010498 | proteasomal protein catabolic process                                     | 79   | 2     | 0.000/0.000/0.000 | 0.996 (1.000)                                    | 0.630 (1.000)                                    |
| GO:0010551 | regulation of gene-specific transcription from RNA polymerase II promoter | 25   | 1     | 0.000/0.000/0.000 | 0.915 (1.000)                                    | 0.788 (1.000)                                    |
| GO:0010556 | regulation of macromolecule biosynthetic process                          | 830  | 39    | 0.000/0.000/0.000 | 1.000 (1.000)                                    | 1.000 (1.000)                                    |
| GO:0010557 | positive regulation of macromolecule biosynthetic process                 | 176  | 6     | 0.000/0.000/0.000 | 0.999 (1.000)                                    | 0.994 (1.000)                                    |
| GO:0010558 | negative regulation of macromolecule biosynthetic process                 | 224  | 6     | 0.000/0.000/0.000 | 1.000 (1.000)                                    | 1.000 (1.000)                                    |

Continued on Next Page...

Table 1 – Continued

| GO ID      | Name                                                                                | Pop  | Study | MGSA              | TfT                                             | PCu           |
|------------|-------------------------------------------------------------------------------------|------|-------|-------------------|-------------------------------------------------|---------------|
| GO:0010564 | regulation of cell cycle process                                                    | 90   | 3     | 0.000/0.000/0.000 | 0.993 (1.000)                                   | 0.216 (0.723) |
| GO:0010604 | positive regulation of macromolecule metabolic process                              | 192  | 6     | 0.000/0.000/0.000 | 1.000 (1.000)                                   | 0.992 (1.000) |
| GO:0010605 | negative regulation of macromolecule metabolic process                              | 266  | 6     | 0.000/0.000/0.000 | 1.000 (1.000)                                   | 1.000 (1.000) |
| GO:0010608 | posttranscriptional regulation of gene expression                                   | 195  | 16    | 0.000/0.000/0.000 | 0.752 (1.000)                                   | 0.009 (0.095) |
| GO:0010628 | positive regulation of gene expression                                              | 159  | 6     | 0.000/0.000/0.000 | 0.998 (1.000)                                   | 0.957 (1.000) |
| GO:0010629 | negative regulation of gene expression                                              | 201  | 6     | 0.000/0.000/0.000 | 1.000 (1.000)                                   | 0.992 (1.000) |
| GO:0010639 | negative regulation of organelle organization                                       | 45   | 2     | 0.000/0.000/0.000 | 0.933 (1.000)                                   | 0.466 (0.969) |
| GO:0010646 | regulation of cell communication                                                    | 122  | 1     | 0.000/0.000/0.000 | 1.000 (1.000)                                   | 0.999 (1.000) |
| GO:0010876 | lipid localization                                                                  | 42   | 2     | 0.000/0.000/0.000 | 0.915 (1.000)                                   | 0.415 (0.950) |
| GO:0010926 | anatomical structure formation                                                      | 617  | 36    | 0.000/0.000/0.000 | 1.000 (1.000)                                   | 1.000 (1.000) |
| GO:0010948 | negative regulation of cell cycle process                                           | 37   | 1     | 0.000/0.000/0.000 | 0.974 (1.000)                                   | 0.595 (1.000) |
| GO:0015031 | protein transport                                                                   | 492  | 16    | 0.000/0.000/0.000 | 1.000 (1.000)                                   | 1.000 (1.000) |
| GO:0015672 | monovalent inorganic cation transport                                               | 46   | 17    | 0.000/0.000/0.001 | $3.37 \times 10^{-7}$ ( $8.10 \times 10^{-6}$ ) | 0.013 (0.124) |
| GO:0015837 | amine transport                                                                     | 53   | 6     | 0.000/0.000/0.000 | 0.378 (0.747)                                   | 0.399 (0.938) |
| GO:0015849 | organic acid transport                                                              | 78   | 14    | 0.000/0.000/0.000 | 0.012 (0.082)                                   | 0.013 (0.124) |
| GO:0015931 | nucleobase, nucleoside, nucleotide and nucleic acid transport                       | 136  | 5     | 0.000/0.000/0.000 | 0.997 (1.000)                                   | 0.998 (1.000) |
| GO:0015992 | proton transport                                                                    | 33   | 14    | 0.000/0.000/0.001 | $5.16 \times 10^{-7}$ ( $1.17 \times 10^{-5}$ ) | 0.189 (0.671) |
| GO:0016042 | lipid catabolic process                                                             | 38   | 7     | 0.000/0.000/0.000 | 0.060 (0.275)                                   | 0.161 (0.631) |
| GO:0016043 | cellular component organization                                                     | 1652 | 68    | 0.000/0.000/0.000 | 1.000 (1.000)                                   | 1.000 (1.000) |
| GO:0016044 | membrane organization                                                               | 260  | 12    | 0.000/0.000/0.000 | 0.999 (1.000)                                   | 0.996 (1.000) |
| GO:0016050 | vesicle organization                                                                | 67   | 2     | 0.000/0.000/0.000 | 0.989 (1.000)                                   | 0.686 (1.000) |
| GO:0016070 | RNA metabolic process                                                               | 1126 | 37    | 0.000/0.000/0.000 | 1.000 (1.000)                                   | 1.000 (1.000) |
| GO:0016071 | mRNA metabolic process                                                              | 259  | 9     | 0.000/0.000/0.000 | 1.000 (1.000)                                   | 0.488 (0.973) |
| GO:0016072 | rRNA metabolic process                                                              | 258  | 9     | 0.000/0.000/0.000 | 1.000 (1.000)                                   | 0.479 (0.973) |
| GO:0016073 | snRNA metabolic process                                                             | 30   | 2     | 0.000/0.000/0.000 | 0.787 (1.000)                                   | 0.253 (0.767) |
| GO:0016125 | sterol metabolic process                                                            | 47   | 3     | 0.000/0.000/0.000 | 0.831 (1.000)                                   | 0.998 (1.000) |
| GO:0016192 | vesicle-mediated transport                                                          | 370  | 6     | 0.000/0.000/0.000 | 1.000 (1.000)                                   | 1.000 (1.000) |
| GO:0016237 | microautophagy                                                                      | 41   | 2     | 0.000/0.000/0.000 | 0.908 (1.000)                                   | 0.823 (1.000) |
| GO:0016310 | phosphorylation                                                                     | 227  | 40    | 0.000/0.000/0.000 | $5.16 \times 10^{-5}$ ( )                       | 0.169 (0.646) |
| GO:0016311 | dephosphorylation                                                                   | 53   | 2     | 0.000/0.000/0.000 | 0.965 (1.000)                                   | 1.000 (1.000) |
| GO:0016458 | gene silencing                                                                      | 112  | 1     | 0.000/0.000/0.000 | 1.000 (1.000)                                   | 1.000 (1.000) |
| GO:0016481 | negative regulation of transcription                                                | 200  | 6     | 0.000/0.000/0.000 | 1.000 (1.000)                                   | 0.856 (1.000) |
| GO:0016485 | protein processing                                                                  | 39   | 3     | 0.000/0.000/0.000 | 0.722 (1.000)                                   | 0.857 (1.000) |
| GO:0016558 | protein import into peroxisome matrix                                               | 20   | 2     | 0.000/0.000/0.000 | 0.572 (0.983)                                   | 0.109 (0.519) |
| GO:0016567 | protein ubiquitination                                                              | 84   | 3     | 0.000/0.000/0.000 | 0.988 (1.000)                                   | 0.432 (0.963) |
| GO:0016568 | chromatin modification                                                              | 195  | 3     | 0.000/0.000/0.000 | 1.000 (1.000)                                   | 0.894 (1.000) |
| GO:0016569 | covalent chromatin modification                                                     | 100  | 3     | 0.000/0.000/0.000 | 0.997 (1.000)                                   | 0.133 (0.572) |
| GO:0016570 | histone modification                                                                | 100  | 3     | 0.000/0.000/0.000 | 0.997 (1.000)                                   | 0.563 (1.000) |
| GO:0016571 | histone methylation                                                                 | 23   | 1     | 0.000/0.000/0.000 | 0.897 (1.000)                                   | 0.502 (0.973) |
| GO:0016573 | histone acetylation                                                                 | 43   | 2     | 0.000/0.000/0.000 | 0.922 (1.000)                                   | 0.348 (0.893) |
| GO:0016579 | protein deubiquitination                                                            | 21   | 1     | 0.000/0.000/0.000 | 0.874 (1.000)                                   | 0.459 (0.967) |
| GO:0017038 | protein import                                                                      | 131  | 4     | 0.000/0.000/0.000 | 0.999 (1.000)                                   | 0.655 (1.000) |
| GO:0018193 | peptidyl-amino acid modification                                                    | 105  | 6     | 0.000/0.000/0.000 | 0.938 (1.000)                                   | 0.134 (0.572) |
| GO:0019219 | regulation of nucleobase, nucleoside, nucleotide and nucleic acid metabolic process | 676  | 26    | 0.000/0.000/0.000 | 1.000 (1.000)                                   | 1.000 (1.000) |
| GO:0019220 | regulation of phosphate metabolic process                                           | 47   | 2     | 0.000/0.000/0.000 | 0.943 (1.000)                                   | 0.999 (1.000) |
| GO:0019222 | regulation of metabolic process                                                     | 1015 | 53    | 0.000/0.000/0.000 | 1.000 (1.000)                                   | 1.000 (1.000) |
| GO:0019236 | response to pheromone                                                               | 90   | 4     | 0.000/0.000/0.000 | 0.975 (1.000)                                   | 0.924 (1.000) |

Continued on Next Page...

Table 1 – Continued

| GO ID      | Name                                                   | Pop  | Study | MGSA              | TfT                                               | PCu           |
|------------|--------------------------------------------------------|------|-------|-------------------|---------------------------------------------------|---------------|
| GO:0019362 | pyridine nucleotide metabolic process                  | 49   | 13    | 0.000/0.000/0.001 | (0.005)                                           | 0.373 (0.917) |
| GO:0019363 | pyridine nucleotide biosynthetic process               | 17   | 2     | 0.000/0.000/0.001 | 0.483 (0.878)                                     | 0.731 (1.000) |
| GO:0019438 | aromatic compound biosynthetic process                 | 18   | 1     | 0.000/0.000/0.000 | 0.830 (1.000)                                     | 0.819 (1.000) |
| GO:0019538 | protein metabolic process                              | 1684 | 136   | 0.000/0.000/0.000 | 0.989 (1.000)                                     | 0.974 (1.000) |
| GO:0019637 | organophosphate metabolic process                      | 116  | 11    | 0.000/0.000/0.000 | 0.531 (0.931)                                     | 0.570 (1.000) |
| GO:0019725 | cellular homeostasis                                   | 148  | 17    | 0.000/0.000/0.000 | 0.221 (0.558)                                     | 0.134 (0.572) |
| GO:0019748 | secondary metabolic process                            | 56   | 13    | 0.000/0.000/0.000 | 0.002 (0.014)                                     | 0.002 (0.033) |
| GO:0019752 | carboxylic acid metabolic process                      | 372  | 81    | 0.000/0.000/0.000 | $4.93 \times 10^{-14}$ ( $2.47 \times 10^{-12}$ ) | 1.000 (1.000) |
| GO:0019932 | second-messenger-mediated signaling                    | 26   | 1     | 0.000/0.000/0.000 | 0.923 (1.000)                                     | 0.562 (1.000) |
| GO:0019941 | modification-dependent protein catabolic process       | 236  | 6     | 0.000/0.000/0.000 | 1.000 (1.000)                                     | 0.519 (0.980) |
| GO:0019953 | sexual reproduction                                    | 235  | 14    | 0.000/0.000/0.000 | 0.980 (1.000)                                     | 0.006 (0.068) |
| GO:0019954 | asexual reproduction                                   | 85   | 1     | 0.000/0.000/0.000 | 1.000 (1.000)                                     | 0.984 (1.000) |
| GO:0022402 | cell cycle process                                     | 516  | 9     | 0.000/0.000/0.000 | 1.000 (1.000)                                     | 1.000 (1.000) |
| GO:0022403 | cell cycle phase                                       | 418  | 9     | 0.000/0.000/0.000 | 1.000 (1.000)                                     | 0.148 (0.603) |
| GO:0022411 | cellular component disassembly                         | 94   | 2     | 0.000/0.000/0.000 | 0.999 (1.000)                                     | 0.910 (1.000) |
| GO:0022413 | reproductive process in single-celled organism         | 143  | 9     | 0.000/0.000/0.000 | 0.930 (1.000)                                     | 0.261 (0.784) |
| GO:0022414 | reproductive process                                   | 149  | 9     | 0.000/0.000/0.000 | 0.948 (1.000)                                     | 0.948 (1.000) |
| GO:0022607 | cellular component assembly                            | 480  | 20    | 0.000/0.000/0.000 | 1.000 (1.000)                                     | 0.691 (1.000) |
| GO:0022613 | ribonucleoprotein complex biogenesis                   | 406  | 10    | 0.000/0.000/0.000 | 1.000 (1.000)                                     | 1.000 (1.000) |
| GO:0022618 | ribonucleoprotein complex assembly                     | 117  | 1     | 0.000/0.000/0.000 | 1.000 (1.000)                                     | 0.977 (1.000) |
| GO:0030003 | cellular cation homeostasis                            | 102  | 10    | 0.000/0.000/0.000 | 0.490 (0.882)                                     | 0.484 (0.973) |
| GO:0030010 | establishment of cell polarity                         | 99   | 1     | 0.000/0.000/0.000 | 1.000 (1.000)                                     | 0.861 (1.000) |
| GO:0030029 | actin filament-based process                           | 110  | 1     | 0.000/0.000/0.000 | 1.000 (1.000)                                     | 1.000 (1.000) |
| GO:0030036 | actin cytoskeleton organization                        | 104  | 1     | 0.000/0.000/0.000 | 1.000 (1.000)                                     | 0.458 (0.967) |
| GO:0030071 | regulation of mitotic metaphase/anaphase transition    | 26   | 1     | 0.000/0.000/0.000 | 0.923 (1.000)                                     | 0.667 (1.000) |
| GO:0030148 | sphingolipid biosynthetic process                      | 20   | 1     | 0.000/0.000/0.001 | 0.861 (1.000)                                     | 0.606 (1.000) |
| GO:0030154 | cell differentiation                                   | 209  | 20    | 0.000/0.000/0.000 | 0.497 (0.882)                                     | 0.004 (0.054) |
| GO:0030163 | protein catabolic process                              | 428  | 41    | 0.000/0.000/0.000 | 0.466 (0.851)                                     | 0.080 (0.421) |
| GO:0030384 | phosphoinositide metabolic process                     | 49   | 1     | 0.000/0.000/0.000 | 0.992 (1.000)                                     | 0.994 (1.000) |
| GO:0030435 | sporulation resulting in formation of a cellular spore | 190  | 20    | 0.000/0.000/0.000 | 0.325 (0.655)                                     | 0.135 (0.572) |
| GO:0030437 | ascospore formation                                    | 88   | 9     | 0.000/0.000/0.000 | 0.444 (0.821)                                     | 0.011 (0.109) |
| GO:0030447 | filamentous growth                                     | 105  | 5     | 0.000/0.000/0.000 | 0.974 (1.000)                                     | 0.216 (0.723) |
| GO:0030490 | maturation of SSU-rRNA                                 | 90   | 3     | 0.000/0.000/0.000 | 0.993 (1.000)                                     | 0.693 (1.000) |
| GO:0031123 | RNA 3'-end processing                                  | 75   | 2     | 0.000/0.000/0.000 | 0.995 (1.000)                                     | 0.496 (0.973) |
| GO:0031124 | mRNA 3'-end processing                                 | 41   | 1     | 0.000/0.000/0.000 | 0.983 (1.000)                                     | 0.634 (1.000) |
| GO:0031125 | rRNA 3'-end processing                                 | 22   | 1     | 0.000/0.000/0.000 | 0.886 (1.000)                                     | 0.558 (1.000) |
| GO:0031137 | regulation of conjugation with cellular fusion         | 30   | 1     | 0.000/0.000/0.000 | 0.948 (1.000)                                     | 0.636 (1.000) |
| GO:0031323 | regulation of cellular metabolic process               | 952  | 51    | 0.000/0.000/0.000 | 1.000 (1.000)                                     | 1.000 (1.000) |
| GO:0031324 | negative regulation of cellular metabolic process      | 257  | 10    | 0.000/0.000/0.000 | 1.000 (1.000)                                     | 1.000 (1.000) |
| GO:0031325 | positive regulation of cellular metabolic process      | 196  | 7     | 0.000/0.000/0.000 | 1.000 (1.000)                                     | 1.000 (1.000) |
| GO:0031326 | regulation of cellular biosynthetic process            | 843  | 41    | 0.000/0.000/0.000 | 1.000 (1.000)                                     | 1.000 (1.000) |
| GO:0031327 | negative regulation of cellular biosynthetic process   | 235  | 8     | 0.000/0.000/0.000 | 1.000 (1.000)                                     | 1.000 (1.000) |
| GO:0031328 | positive regulation of cellular biosynthetic process   | 180  | 7     | 0.000/0.000/0.000 | 0.999 (1.000)                                     | 0.998 (1.000) |

Continued on Next Page...



Table 1 – Continued

| GO ID      | Name                                                             | Pop  | Study | MGSA              | TfT                                              | PCu                                              |
|------------|------------------------------------------------------------------|------|-------|-------------------|--------------------------------------------------|--------------------------------------------------|
| GO:0031329 | regulation of cellular catabolic process                         | 38   | 6     | 0.000/0.000/0.000 | 0.140 (0.423)                                    | 0.115 (0.531)                                    |
| GO:0031497 | chromatin assembly                                               | 49   | 1     | 0.000/0.000/0.000 | 0.992 (1.000)                                    | 0.876 (1.000)                                    |
| GO:0031505 | fungal-type cell wall organization                               | 21   | 1     | 0.000/0.000/0.000 | 0.874 (1.000)                                    | 0.854 (1.000)                                    |
| GO:0031577 | spindle checkpoint                                               | 27   | 1     | 0.000/0.000/0.000 | 0.930 (1.000)                                    | 0.458 (0.967)                                    |
| GO:0032005 | signal transduction involved in conjugation with cellular fusion | 26   | 1     | 0.000/0.000/0.000 | 0.923 (1.000)                                    | 0.669 (1.000)                                    |
| GO:0032259 | methylation                                                      | 64   | 3     | 0.000/0.000/0.000 | 0.947 (1.000)                                    | 0.731 (1.000)                                    |
| GO:0032268 | regulation of cellular protein metabolic process                 | 216  | 17    | 0.000/0.000/0.000 | 0.813 (1.000)                                    | 0.401 (0.940)                                    |
| GO:0032269 | negative regulation of cellular protein metabolic process        | 23   | 1     | 0.000/0.000/0.000 | 0.897 (1.000)                                    | 0.842 (1.000)                                    |
| GO:0032446 | protein modification by small protein conjugation                | 106  | 3     | 0.000/0.000/0.000 | 0.998 (1.000)                                    | 0.503 (0.974)                                    |
| GO:0032502 | developmental process                                            | 410  | 30    | 0.000/0.000/0.000 | 0.946 (1.000)                                    | 0.946 (1.000)                                    |
| GO:0032505 | reproduction of a single-celled organism                         | 188  | 10    | 0.000/0.000/0.000 | 0.986 (1.000)                                    | 0.177 (0.654)                                    |
| GO:0032506 | cytokinetic process                                              | 92   | 1     | 0.000/0.000/0.000 | 1.000 (1.000)                                    | 1.000 (1.000)                                    |
| GO:0032535 | regulation of cellular component size                            | 118  | 1     | 0.000/0.000/0.000 | 1.000 (1.000)                                    | 1.000 (1.000)                                    |
| GO:0032569 | gene-specific transcription from RNA polymerase II promoter      | 31   | 1     | 0.000/0.000/0.000 | 0.953 (1.000)                                    | 0.752 (1.000)                                    |
| GO:0032583 | regulation of gene-specific transcription                        | 31   | 1     | 0.000/0.000/0.000 | 0.953 (1.000)                                    | 0.788 (1.000)                                    |
| GO:0032774 | RNA biosynthetic process                                         | 576  | 21    | 0.000/0.000/0.000 | 1.000 (1.000)                                    | 1.000 (1.000)                                    |
| GO:0032879 | regulation of localization                                       | 135  | 6     | 0.000/0.000/0.000 | 0.990 (1.000)                                    | 0.949 (1.000)                                    |
| GO:0032984 | macromolecular complex disassembly                               | 91   | 2     | 0.000/0.000/0.000 | 0.999 (1.000)                                    | 0.855 (1.000)                                    |
| GO:0032989 | cellular component morphogenesis                                 | 157  | 4     | 0.000/0.000/0.000 | 1.000 (1.000)                                    | 0.939 (1.000)                                    |
| GO:0033036 | macromolecule localization                                       | 690  | 23    | 0.000/0.000/0.000 | 1.000 (1.000)                                    | 1.000 (1.000)                                    |
| GO:0033043 | regulation of organelle organization                             | 106  | 2     | 0.000/0.000/0.000 | 1.000 (1.000)                                    | 0.975 (1.000)                                    |
| GO:0033044 | regulation of chromosome organization                            | 31   | 1     | 0.000/0.000/0.000 | 0.953 (1.000)                                    | 0.447 (0.967)                                    |
| GO:0033205 | cytokinesis during cell cycle                                    | 71   | 1     | 0.000/0.000/0.000 | 0.999 (1.000)                                    | 0.716 (1.000)                                    |
| GO:0033365 | protein localization in organelle                                | 151  | 5     | 0.000/0.000/0.000 | 0.999 (1.000)                                    | 0.622 (1.000)                                    |
| GO:0033554 | cellular response to stress                                      | 511  | 57    | 0.000/0.000/0.000 | 0.087 (0.319)                                    | 0.589 (1.000)                                    |
| GO:0034293 | sexual sporulation                                               | 88   | 9     | 0.000/0.000/0.000 | 0.444 (0.821)                                    | 0.110 (0.521)                                    |
| GO:0034470 | ncRNA processing                                                 | 343  | 10    | 0.000/0.000/0.000 | 1.000 (1.000)                                    | 0.076 (0.410)                                    |
| GO:0034504 | protein localization in nucleus                                  | 62   | 1     | 0.000/0.000/0.000 | 0.998 (1.000)                                    | 0.932 (1.000)                                    |
| GO:0034613 | cellular protein localization                                    | 359  | 12    | 0.000/0.000/0.000 | 1.000 (1.000)                                    | 0.366 (0.915)                                    |
| GO:0034621 | cellular macromolecular complex subunit organization             | 438  | 10    | 0.000/0.000/0.000 | 1.000 (1.000)                                    | 1.000 (1.000)                                    |
| GO:0034622 | cellular macromolecular complex assembly                         | 313  | 8     | 0.000/0.000/0.000 | 1.000 (1.000)                                    | 0.958 (1.000)                                    |
| GO:0034623 | cellular macromolecular complex disassembly                      | 91   | 2     | 0.000/0.000/0.000 | 0.999 (1.000)                                    | 0.650 (1.000)                                    |
| GO:0034641 | cellular nitrogen compound metabolic process                     | 271  | 58    | 0.000/0.000/0.000 | $6.20 \times 10^{-10}$ ( $2.07 \times 10^{-8}$ ) | $3.68 \times 10^{-10}$ ( $2.26 \times 10^{-8}$ ) |
| GO:0034645 | cellular macromolecule biosynthetic process                      | 1595 | 119   | 0.000/0.000/0.000 | 0.999 (1.000)                                    | 0.707 (1.000)                                    |
| GO:0034660 | ncRNA metabolic process                                          | 401  | 13    | 0.000/0.000/0.000 | 1.000 (1.000)                                    | 0.587 (1.000)                                    |
| GO:0034727 | piecemeal microautophagy of nucleus                              | 33   | 2     | 0.000/0.000/0.000 | 0.829 (1.000)                                    | 0.558 (1.000)                                    |
| GO:0034728 | nucleosome organization                                          | 60   | 1     | 0.000/0.000/0.000 | 0.997 (1.000)                                    | 0.756 (1.000)                                    |
| GO:0034960 | cellular biopolymer metabolic process                            | 2661 | 170   | 0.000/0.000/0.000 | 1.000 (1.000)                                    | 1.000 (1.000)                                    |
| GO:0034961 | cellular biopolymer biosynthetic process                         | 1482 | 114   | 0.000/0.000/0.000 | 0.997 (1.000)                                    | 0.002 (0.027)                                    |
| GO:0034962 | cellular biopolymer catabolic process                            | 462  | 38    | 0.000/0.000/0.000 | 0.834 (1.000)                                    | 0.103 (0.508)                                    |

Continued on Next Page...

Table 1 – Continued

| GO ID      | Name                                                                        | Pop  | Study | MGSA              | TfT                                               | PCu                                               |
|------------|-----------------------------------------------------------------------------|------|-------|-------------------|---------------------------------------------------|---------------------------------------------------|
| GO:0034984 | cellular response to DNA damage stimulus                                    | 251  | 1     | 0.000/0.000/0.000 | 1.000 (1.000)                                     | 1.000 (1.000)                                     |
| GO:0040007 | growth                                                                      | 142  | 5     | 0.000/0.000/0.000 | 0.998 (1.000)                                     | 0.998 (1.000)                                     |
| GO:0040020 | regulation of meiosis                                                       | 23   | 1     | 0.000/0.000/0.000 | 0.897 (1.000)                                     | 0.633 (1.000)                                     |
| GO:0040029 | regulation of gene expression, epigenetic                                   | 109  | 1     | 0.000/0.000/0.000 | 1.000 (1.000)                                     | 0.996 (1.000)                                     |
| GO:0042144 | vacuole fusion, non-autophagic                                              | 28   | 2     | 0.000/0.000/0.000 | 0.753 (1.000)                                     | 0.393 (0.936)                                     |
| GO:0042157 | lipoprotein metabolic process                                               | 54   | 3     | 0.000/0.000/0.000 | 0.894 (1.000)                                     | 0.715 (1.000)                                     |
| GO:0042158 | lipoprotein biosynthetic process                                            | 53   | 2     | 0.000/0.000/0.000 | 0.965 (1.000)                                     | 0.919 (1.000)                                     |
| GO:0042176 | regulation of protein catabolic process                                     | 26   | 3     | 0.000/0.000/0.000 | 0.446 (0.821)                                     | 0.409 (0.950)                                     |
| GO:0042180 | cellular ketone metabolic process                                           | 383  | 81    | 0.000/0.000/0.000 | $2.71 \times 10^{-13}$ ( $1.08 \times 10^{-11}$ ) | $6.46 \times 10^{-14}$ ( $6.84 \times 10^{-12}$ ) |
| GO:0042221 | response to chemical stimulus                                               | 428  | 49    | 0.000/0.000/0.000 | 0.076 (0.314)                                     | 0.280 (0.809)                                     |
| GO:0042254 | ribosome biogenesis                                                         | 363  | 10    | 0.000/0.000/0.000 | 1.000 (1.000)                                     | 0.322 (0.872)                                     |
| GO:0042255 | ribosome assembly                                                           | 72   | 1     | 0.000/0.000/0.000 | 0.999 (1.000)                                     | 0.861 (1.000)                                     |
| GO:0042257 | ribosomal subunit assembly                                                  | 58   | 1     | 0.000/0.000/0.000 | 0.997 (1.000)                                     | 0.806 (1.000)                                     |
| GO:0042273 | ribosomal large subunit biogenesis                                          | 75   | 1     | 0.000/0.000/0.000 | 0.999 (1.000)                                     | 0.874 (1.000)                                     |
| GO:0042274 | ribosomal small subunit biogenesis                                          | 53   | 1     | 0.000/0.000/0.000 | 0.995 (1.000)                                     | 0.757 (1.000)                                     |
| GO:0042325 | regulation of phosphorylation                                               | 41   | 1     | 0.000/0.000/0.000 | 0.983 (1.000)                                     | 1.000 (1.000)                                     |
| GO:0042364 | water-soluble vitamin biosynthetic process                                  | 49   | 3     | 0.000/0.000/0.000 | 0.851 (1.000)                                     | 1.000 (1.000)                                     |
| GO:0042398 | cellular amino acid derivative biosynthetic process                         | 26   | 1     | 0.000/0.000/0.000 | 0.923 (1.000)                                     | 0.919 (1.000)                                     |
| GO:0042493 | response to drug                                                            | 116  | 11    | 0.000/0.000/0.000 | 0.531 (0.931)                                     | 0.828 (1.000)                                     |
| GO:0042546 | cell wall biogenesis                                                        | 68   | 7     | 0.000/0.000/0.000 | 0.457 (0.838)                                     | 0.031 (0.227)                                     |
| GO:0042592 | homeostatic process                                                         | 192  | 17    | 0.000/0.000/0.000 | 0.637 (1.000)                                     | 0.024 (0.189)                                     |
| GO:0042787 | protein ubiquitination during ubiquitin-dependent protein catabolic process | 19   | 1     | 0.000/0.000/0.000 | 0.846 (1.000)                                     | 0.355 (0.902)                                     |
| GO:0043038 | amino acid activation                                                       | 41   | 1     | 0.000/0.000/0.000 | 0.983 (1.000)                                     | 1.000 (1.000)                                     |
| GO:0043039 | tRNA aminoacylation                                                         | 41   | 1     | 0.000/0.000/0.000 | 0.983 (1.000)                                     | 0.573 (1.000)                                     |
| GO:0043094 | cellular metabolic compound salvage                                         | 61   | 2     | 0.000/0.000/0.000 | 0.982 (1.000)                                     | 0.983 (1.000)                                     |
| GO:0043161 | proteasomal ubiquitin-dependent protein catabolic process                   | 79   | 2     | 0.000/0.000/0.000 | 0.996 (1.000)                                     | 0.391 (0.934)                                     |
| GO:0043170 | macromolecule metabolic process                                             | 2790 | 188   | 0.000/0.000/0.000 | 1.000 (1.000)                                     | 1.000 (1.000)                                     |
| GO:0043241 | protein complex disassembly                                                 | 68   | 2     | 0.000/0.000/0.000 | 0.990 (1.000)                                     | 0.556 (1.000)                                     |
| GO:0043254 | regulation of protein complex assembly                                      | 19   | 1     | 0.000/0.000/0.000 | 0.846 (1.000)                                     | 0.678 (1.000)                                     |
| GO:0043283 | biopolymer metabolic process                                                | 2749 | 178   | 0.000/0.000/0.000 | 1.000 (1.000)                                     | 1.000 (1.000)                                     |
| GO:0043284 | biopolymer biosynthetic process                                             | 1483 | 114   | 0.000/0.000/0.000 | 0.997 (1.000)                                     | 0.003 (0.043)                                     |
| GO:0043285 | biopolymer catabolic process                                                | 554  | 47    | 0.000/0.000/0.000 | 0.797 (1.000)                                     | 0.046 (0.303)                                     |
| GO:0043412 | biopolymer modification                                                     | 716  | 24    | 0.000/0.000/0.000 | 1.000 (1.000)                                     | 1.000 (1.000)                                     |
| GO:0043413 | biopolymer glycosylation                                                    | 69   | 3     | 0.000/0.000/0.000 | 0.964 (1.000)                                     | 0.412 (0.950)                                     |
| GO:0043414 | biopolymer methylation                                                      | 63   | 3     | 0.000/0.000/0.000 | 0.943 (1.000)                                     | 0.778 (1.000)                                     |
| GO:0043436 | oxoacid metabolic process                                                   | 372  | 81    | 0.000/0.000/0.000 | $4.93 \times 10^{-14}$ ( $2.47 \times 10^{-12}$ ) | 0.106 (0.517)                                     |
| GO:0043543 | protein amino acid acylation                                                | 67   | 3     | 0.000/0.000/0.000 | 0.958 (1.000)                                     | 0.410 (0.950)                                     |
| GO:0043549 | regulation of kinase activity                                               | 34   | 1     | 0.000/0.000/0.000 | 0.965 (1.000)                                     | 0.791 (1.000)                                     |
| GO:0043574 | peroxisomal transport                                                       | 22   | 2     | 0.000/0.000/0.000 | 0.625 (1.000)                                     | 0.176 (0.654)                                     |
| GO:0043603 | cellular amide metabolic process                                            | 62   | 13    | 0.000/0.000/0.000 | 0.004 (0.032)                                     | 0.600 (1.000)                                     |
| GO:0043623 | cellular protein complex assembly                                           | 129  | 6     | 0.000/0.000/0.000 | 0.986 (1.000)                                     | 0.443 (0.967)                                     |
| GO:0043624 | cellular protein complex disassembly                                        | 68   | 2     | 0.000/0.000/0.000 | 0.990 (1.000)                                     | 0.556 (1.000)                                     |
| GO:0043628 | ncRNA 3'-end processing                                                     | 36   | 1     | 0.000/0.000/0.000 | 0.971 (1.000)                                     | 0.673 (1.000)                                     |

Continued on Next Page...

Table 1 – Continued

| GO ID      | Name                                                                                         | Pop  | Study | MGSA              | TfT                                              | PCu                                              |
|------------|----------------------------------------------------------------------------------------------|------|-------|-------------------|--------------------------------------------------|--------------------------------------------------|
| GO:0043632 | modification-dependent macromolecule catabolic process                                       | 254  | 6     | 0.000/0.000/0.000 | 1.000 (1.000)                                    | 1.000 (1.000)                                    |
| GO:0043687 | post-translational protein modification                                                      | 426  | 12    | 0.000/0.000/0.000 | 1.000 (1.000)                                    | 0.932 (1.000)                                    |
| GO:0043900 | regulation of multi-organism process                                                         | 30   | 1     | 0.000/0.000/0.000 | 0.948 (1.000)                                    | 0.812 (1.000)                                    |
| GO:0043933 | macromolecular complex subunit organization                                                  | 488  | 17    | 0.000/0.000/0.000 | 1.000 (1.000)                                    | 0.835 (1.000)                                    |
| GO:0043934 | sporulation                                                                                  | 190  | 20    | 0.000/0.000/0.000 | 0.325 (0.655)                                    | 0.016 (0.147)                                    |
| GO:0043935 | sexual sporulation resulting in formation of a cellular spore                                | 88   | 9     | 0.000/0.000/0.000 | 0.444 (0.821)                                    | 0.639 (1.000)                                    |
| GO:0044085 | cellular component biogenesis                                                                | 796  | 31    | 0.000/0.000/0.000 | 1.000 (1.000)                                    | 1.000 (1.000)                                    |
| GO:0044087 | regulation of cellular component biogenesis                                                  | 43   | 1     | 0.000/0.000/0.000 | 0.986 (1.000)                                    | 0.903 (1.000)                                    |
| GO:0044106 | cellular amine metabolic process                                                             | 235  | 43    | 0.000/0.000/0.000 | $1.02 \times 10^{-5}$ ()                         | 0.477 (0.973)                                    |
| GO:0044182 | filamentous growth of a population of unicellular organisms                                  | 79   | 3     | 0.000/0.000/0.000 | 0.983 (1.000)                                    | 0.904 (1.000)                                    |
| GO:0044237 | cellular metabolic process                                                                   | 3405 | 320   | 0.000/0.000/0.000 | 0.489 (0.882)                                    | 0.004 (0.049)                                    |
| GO:0044238 | primary metabolic process                                                                    | 3281 | 295   | 0.000/0.000/0.000 | 0.900 (1.000)                                    | 1.000 (1.000)                                    |
| GO:0044242 | cellular lipid catabolic process                                                             | 25   | 6     | 0.000/0.000/0.000 | 0.025 (0.137)                                    | 0.069 (0.384)                                    |
| GO:0044248 | cellular catabolic process                                                                   | 746  | 98    | 0.000/0.000/0.000 | (0.002)                                          | $8.75 \times 10^{-5}$ (0.003)                    |
| GO:0044249 | cellular biosynthetic process                                                                | 1999 | 177   | 0.000/0.000/0.000 | 0.856 (1.000)                                    | 0.904 (1.000)                                    |
| GO:0044255 | cellular lipid metabolic process                                                             | 269  | 26    | 0.000/0.000/0.000 | 0.465 (0.851)                                    | 0.468 (0.970)                                    |
| GO:0044257 | cellular protein catabolic process                                                           | 339  | 32    | 0.000/0.000/0.000 | 0.512 (0.905)                                    | 0.152 (0.612)                                    |
| GO:0044260 | cellular macromolecule metabolic process                                                     | 2695 | 181   | 0.000/0.000/0.000 | 1.000 (1.000)                                    | 1.000 (1.000)                                    |
| GO:0044262 | cellular carbohydrate metabolic process                                                      | 286  | 60    | 0.000/0.000/0.000 | $7.04 \times 10^{-10}$ ( $2.29 \times 10^{-8}$ ) | $3.64 \times 10^{-10}$ ( $2.26 \times 10^{-8}$ ) |
| GO:0044265 | cellular macromolecule catabolic process                                                     | 511  | 50    | 0.000/0.000/0.000 | 0.393 (0.752)                                    | 0.043 (0.287)                                    |
| GO:0044267 | cellular protein metabolic process                                                           | 1588 | 129   | 0.000/0.000/0.000 | 0.983 (1.000)                                    | $1.41 \times 10^{-5}$ ()                         |
| GO:0044271 | nitrogen compound biosynthetic process                                                       | 183  | 34    | 0.000/0.000/0.000 | $6.43 \times 10^{-5}$ ()                         | $4.19 \times 10^{-5}$ (0.001)                    |
| GO:0045017 | glycerolipid biosynthetic process                                                            | 53   | 3     | 0.000/0.000/0.000 | 0.886 (1.000)                                    | 0.861 (1.000)                                    |
| GO:0045047 | protein targeting to ER                                                                      | 27   | 4     | 0.000/0.000/0.000 | 0.243 (0.594)                                    | 0.025 (0.196)                                    |
| GO:0045132 | meiotic chromosome segregation                                                               | 23   | 1     | 0.000/0.000/0.000 | 0.897 (1.000)                                    | 0.505 (0.974)                                    |
| GO:0045184 | establishment of protein localization                                                        | 530  | 18    | 0.000/0.000/0.000 | 1.000 (1.000)                                    | 1.000 (1.000)                                    |
| GO:0045229 | external encapsulating structure organization                                                | 216  | 18    | 0.000/0.000/0.000 | 0.738 (1.000)                                    | 0.599 (1.000)                                    |
| GO:0045449 | regulation of transcription                                                                  | 624  | 23    | 0.000/0.000/0.000 | 1.000 (1.000)                                    | 0.995 (1.000)                                    |
| GO:0045786 | negative regulation of cell cycle                                                            | 22   | 1     | 0.000/0.000/0.000 | 0.886 (1.000)                                    | 0.412 (0.950)                                    |
| GO:0045814 | negative regulation of gene expression, epigenetic                                           | 108  | 1     | 0.000/0.000/0.000 | 1.000 (1.000)                                    | 0.991 (1.000)                                    |
| GO:0045839 | negative regulation of mitosis                                                               | 20   | 1     | 0.000/0.000/0.000 | 0.861 (1.000)                                    | 0.190 (0.671)                                    |
| GO:0045841 | negative regulation of mitotic metaphase/anaphase transition                                 | 20   | 1     | 0.000/0.000/0.000 | 0.861 (1.000)                                    | 0.606 (1.000)                                    |
| GO:0045859 | regulation of protein kinase activity                                                        | 33   | 1     | 0.000/0.000/0.000 | 0.962 (1.000)                                    | 0.971 (1.000)                                    |
| GO:0045892 | negative regulation of transcription, DNA-dependent                                          | 180  | 6     | 0.000/0.000/0.000 | 1.000 (1.000)                                    | 0.660 (1.000)                                    |
| GO:0045893 | positive regulation of transcription, DNA-dependent                                          | 123  | 6     | 0.000/0.000/0.000 | 0.979 (1.000)                                    | 0.263 (0.786)                                    |
| GO:0045934 | negative regulation of nucleobase, nucleoside, nucleotide and nucleic acid metabolic process | 224  | 8     | 0.000/0.000/0.000 | 1.000 (1.000)                                    | 0.979 (1.000)                                    |

Continued on Next Page...

Table 1 – Continued

| GO ID      | Name                                                                                         | Pop  | Study | MGSA              | TfT                      | PCu           |
|------------|----------------------------------------------------------------------------------------------|------|-------|-------------------|--------------------------|---------------|
| GO:0045935 | positive regulation of nucleobase, nucleoside, nucleotide and nucleic acid metabolic process | 167  | 6     | 0.000/0.000/0.000 | 0.999 (1.000)            | 0.957 (1.000) |
| GO:0045941 | positive regulation of transcription                                                         | 158  | 6     | 0.000/0.000/0.000 | 0.998 (1.000)            | 0.500 (0.973) |
| GO:0045944 | positive regulation of transcription from RNA polymerase II promoter                         | 87   | 5     | 0.000/0.000/0.000 | 0.921 (1.000)            | 0.278 (0.806) |
| GO:0046034 | ATP metabolic process                                                                        | 40   | 14    | 0.000/0.000/0.000 | $7.88 \times 10^{-6}$ () | 0.659 (1.000) |
| GO:0046467 | membrane lipid biosynthetic process                                                          | 20   | 1     | 0.000/0.000/0.001 | 0.861 (1.000)            | 0.843 (1.000) |
| GO:0046474 | glycerophospholipid biosynthetic process                                                     | 51   | 3     | 0.000/0.000/0.000 | 0.870 (1.000)            | 0.897 (1.000) |
| GO:0046483 | heterocycle metabolic process                                                                | 219  | 34    | 0.000/0.000/0.000 | 0.002 (0.018)            | 0.002 (0.031) |
| GO:0046486 | glycerolipid metabolic process                                                               | 83   | 5     | 0.000/0.000/0.000 | 0.900 (1.000)            | 0.947 (1.000) |
| GO:0046489 | phosphoinositide biosynthetic process                                                        | 32   | 1     | 0.000/0.000/0.000 | 0.958 (1.000)            | 0.858 (1.000) |
| GO:0046578 | regulation of Ras protein signal transduction                                                | 35   | 1     | 0.000/0.000/0.000 | 0.968 (1.000)            | 0.891 (1.000) |
| GO:0046700 | heterocycle catabolic process                                                                | 30   | 6     | 0.000/0.000/0.001 | 0.056 (0.262)            | 0.210 (0.723) |
| GO:0046907 | intracellular transport                                                                      | 602  | 21    | 0.000/0.000/0.000 | 1.000 (1.000)            | 1.000 (1.000) |
| GO:0046942 | carboxylic acid transport                                                                    | 65   | 11    | 0.000/0.000/0.000 | 0.037 (0.194)            | 0.825 (1.000) |
| GO:0046999 | regulation of conjugation                                                                    | 30   | 1     | 0.000/0.000/0.000 | 0.948 (1.000)            | 0.726 (1.000) |
| GO:0048193 | Golgi vesicle transport                                                                      | 180  | 1     | 0.000/0.000/0.000 | 1.000 (1.000)            | 0.999 (1.000) |
| GO:0048284 | organelle fusion                                                                             | 66   | 1     | 0.000/0.000/0.000 | 0.999 (1.000)            | 0.908 (1.000) |
| GO:0048285 | organelle fission                                                                            | 205  | 4     | 0.000/0.000/0.000 | 1.000 (1.000)            | 0.944 (1.000) |
| GO:0048308 | organelle inheritance                                                                        | 63   | 1     | 0.000/0.000/0.000 | 0.998 (1.000)            | 0.897 (1.000) |
| GO:0048311 | mitochondrion distribution                                                                   | 29   | 1     | 0.000/0.000/0.000 | 0.943 (1.000)            | 0.887 (1.000) |
| GO:0048468 | cell development                                                                             | 88   | 9     | 0.000/0.000/0.000 | 0.444 (0.821)            | 0.096 (0.485) |
| GO:0048518 | positive regulation of biological process                                                    | 224  | 9     | 0.000/0.000/0.000 | 0.999 (1.000)            | 0.999 (1.000) |
| GO:0048519 | negative regulation of biological process                                                    | 386  | 10    | 0.000/0.000/0.000 | 1.000 (1.000)            | 1.000 (1.000) |
| GO:0048522 | positive regulation of cellular process                                                      | 214  | 9     | 0.000/0.000/0.000 | 0.999 (1.000)            | 0.997 (1.000) |
| GO:0048523 | negative regulation of cellular process                                                      | 351  | 10    | 0.000/0.000/0.000 | 1.000 (1.000)            | 1.000 (1.000) |
| GO:0048610 | reproductive cellular process                                                                | 143  | 9     | 0.000/0.000/0.000 | 0.930 (1.000)            | 0.881 (1.000) |
| GO:0048646 | anatomical structure formation involved in morphogenesis                                     | 190  | 20    | 0.000/0.000/0.000 | 0.325 (0.655)            | 0.001 (0.021) |
| GO:0048856 | anatomical structure development                                                             | 329  | 23    | 0.000/0.000/0.000 | 0.953 (1.000)            | 0.779 (1.000) |
| GO:0048869 | cellular developmental process                                                               | 347  | 23    | 0.000/0.000/0.000 | 0.976 (1.000)            | 0.935 (1.000) |
| GO:0048878 | chemical homeostasis                                                                         | 153  | 11    | 0.000/0.000/0.000 | 0.862 (1.000)            | 0.966 (1.000) |
| GO:0050657 | nucleic acid transport                                                                       | 115  | 3     | 0.000/0.000/0.000 | 0.999 (1.000)            | 0.974 (1.000) |
| GO:0050658 | RNA transport                                                                                | 115  | 3     | 0.000/0.000/0.000 | 0.999 (1.000)            | 1.000 (1.000) |
| GO:0050789 | regulation of biological process                                                             | 1476 | 80    | 0.000/0.000/0.000 | 1.000 (1.000)            | 1.000 (1.000) |
| GO:0050790 | regulation of catalytic activity                                                             | 106  | 7     | 0.000/0.000/0.000 | 0.881 (1.000)            | 0.960 (1.000) |
| GO:0050793 | regulation of developmental process                                                          | 24   | 3     | 0.000/0.000/0.000 | 0.394 (0.752)            | 0.155 (0.619) |
| GO:0050794 | regulation of cellular process                                                               | 1355 | 73    | 0.000/0.000/0.000 | 1.000 (1.000)            | 1.000 (1.000) |
| GO:0050801 | ion homeostasis                                                                              | 152  | 11    | 0.000/0.000/0.000 | 0.857 (1.000)            | 0.928 (1.000) |
| GO:0050896 | response to stimulus                                                                         | 1050 | 112   | 0.000/0.000/0.000 | 0.062 (0.285)            | 0.062 (0.367) |
| GO:0051028 | mRNA transport                                                                               | 84   | 1     | 0.000/0.000/0.000 | 1.000 (1.000)            | 0.982 (1.000) |
| GO:0051031 | tRNA transport                                                                               | 35   | 2     | 0.000/0.000/0.000 | 0.853 (1.000)            | 0.219 (0.723) |
| GO:0051049 | regulation of transport                                                                      | 126  | 6     | 0.000/0.000/0.000 | 0.983 (1.000)            | 0.988 (1.000) |
| GO:0051052 | regulation of DNA metabolic process                                                          | 60   | 1     | 0.000/0.000/0.000 | 0.997 (1.000)            | 0.951 (1.000) |
| GO:0051056 | regulation of small GTPase mediated signal transduction                                      | 41   | 1     | 0.000/0.000/0.000 | 0.983 (1.000)            | 0.665 (1.000) |

Continued on Next Page...

Table 1 – Continued

| GO ID      | Name                                                       | Pop  | Study | MGSA              | TfT                                               | PCu                                               |
|------------|------------------------------------------------------------|------|-------|-------------------|---------------------------------------------------|---------------------------------------------------|
| GO:0051128 | regulation of cellular component organization              | 168  | 6     | 0.000/0.000/0.000 | 0.999 (1.000)                                     | 0.893 (1.000)                                     |
| GO:0051129 | negative regulation of cellular component organization     | 66   | 2     | 0.000/0.000/0.000 | 0.989 (1.000)                                     | 0.767 (1.000)                                     |
| GO:0051168 | nuclear export                                             | 127  | 3     | 0.000/0.000/0.000 | 1.000 (1.000)                                     | 0.962 (1.000)                                     |
| GO:0051169 | nuclear transport                                          | 154  | 5     | 0.000/0.000/0.000 | 0.999 (1.000)                                     | 0.659 (1.000)                                     |
| GO:0051170 | nuclear import                                             | 60   | 1     | 0.000/0.000/0.000 | 0.997 (1.000)                                     | 0.919 (1.000)                                     |
| GO:0051171 | regulation of nitrogen compound metabolic process          | 681  | 26    | 0.000/0.000/0.000 | 1.000 (1.000)                                     | 1.000 (1.000)                                     |
| GO:0051172 | negative regulation of nitrogen compound metabolic process | 224  | 8     | 0.000/0.000/0.000 | 1.000 (1.000)                                     | 0.998 (1.000)                                     |
| GO:0051173 | positive regulation of nitrogen compound metabolic process | 167  | 6     | 0.000/0.000/0.000 | 0.999 (1.000)                                     | 0.995 (1.000)                                     |
| GO:0051174 | regulation of phosphorus metabolic process                 | 47   | 2     | 0.000/0.000/0.000 | 0.943 (1.000)                                     | 0.921 (1.000)                                     |
| GO:0051179 | localization                                               | 1352 | 122   | 0.000/0.000/0.000 | 0.713 (1.000)                                     | 0.713 (1.000)                                     |
| GO:0051181 | cofactor transport                                         | 49   | 1     | 0.000/0.000/0.000 | 0.992 (1.000)                                     | 0.994 (1.000)                                     |
| GO:0051186 | cofactor metabolic process                                 | 194  | 55    | 0.000/0.000/0.000 | $9.59 \times 10^{-15}$ ( $6.06 \times 10^{-13}$ ) | $4.24 \times 10^{-15}$ ( $6.17 \times 10^{-13}$ ) |
| GO:0051188 | cofactor biosynthetic process                              | 103  | 7     | 0.000/0.000/0.000 | 0.862 (1.000)                                     | 0.917 (1.000)                                     |
| GO:0051234 | establishment of localization                              | 1277 | 120   | 0.000/0.000/0.000 | 0.506 (0.895)                                     | 0.506 (0.974)                                     |
| GO:0051236 | establishment of RNA localization                          | 115  | 3     | 0.000/0.000/0.000 | 0.999 (1.000)                                     | 0.999 (1.000)                                     |
| GO:0051246 | regulation of protein metabolic process                    | 272  | 20    | 0.000/0.000/0.000 | 0.903 (1.000)                                     | 0.557 (1.000)                                     |
| GO:0051248 | negative regulation of protein metabolic process           | 46   | 1     | 0.000/0.000/0.000 | 0.989 (1.000)                                     | 0.975 (1.000)                                     |
| GO:0051252 | regulation of RNA metabolic process                        | 433  | 20    | 0.000/0.000/0.000 | 1.000 (1.000)                                     | 0.433 (0.963)                                     |
| GO:0051253 | negative regulation of RNA metabolic process               | 181  | 6     | 0.000/0.000/0.000 | 1.000 (1.000)                                     | 0.546 (1.000)                                     |
| GO:0051254 | positive regulation of RNA metabolic process               | 127  | 6     | 0.000/0.000/0.000 | 0.984 (1.000)                                     | 0.211 (0.723)                                     |
| GO:0051276 | chromosome organization                                    | 379  | 7     | 0.000/0.000/0.000 | 1.000 (1.000)                                     | 0.992 (1.000)                                     |
| GO:0051301 | cell division                                              | 307  | 4     | 0.000/0.000/0.000 | 1.000 (1.000)                                     | 1.000 (1.000)                                     |
| GO:0051321 | meiotic cell cycle                                         | 171  | 8     | 0.000/0.000/0.000 | 0.993 (1.000)                                     | 0.002 (0.034)                                     |
| GO:0051327 | M phase of meiotic cell cycle                              | 166  | 8     | 0.000/0.000/0.000 | 0.991 (1.000)                                     | 0.013 (0.129)                                     |
| GO:0051336 | regulation of hydrolase activity                           | 35   | 4     | 0.000/0.000/0.000 | 0.419 (0.789)                                     | 0.161 (0.631)                                     |
| GO:0051338 | regulation of transferase activity                         | 36   | 1     | 0.000/0.000/0.000 | 0.971 (1.000)                                     | 0.951 (1.000)                                     |
| GO:0051445 | regulation of meiotic cell cycle                           | 24   | 1     | 0.000/0.000/0.000 | 0.906 (1.000)                                     | 0.584 (1.000)                                     |
| GO:0051603 | proteolysis involved in cellular protein catabolic process | 245  | 6     | 0.000/0.000/0.000 | 1.000 (1.000)                                     | 1.000 (1.000)                                     |
| GO:0051604 | protein maturation                                         | 41   | 3     | 0.000/0.000/0.000 | 0.753 (1.000)                                     | 0.512 (0.976)                                     |
| GO:0051640 | organelle localization                                     | 112  | 1     | 0.000/0.000/0.000 | 1.000 (1.000)                                     | 0.979 (1.000)                                     |
| GO:0051641 | cellular localization                                      | 733  | 23    | 0.000/0.000/0.000 | 1.000 (1.000)                                     | 1.000 (1.000)                                     |
| GO:0051646 | mitochondrion localization                                 | 32   | 1     | 0.000/0.000/0.000 | 0.958 (1.000)                                     | 0.286 (0.813)                                     |
| GO:0051649 | establishment of localization in cell                      | 650  | 21    | 0.000/0.000/0.000 | 1.000 (1.000)                                     | 1.000 (1.000)                                     |
| GO:0051704 | multi-organism process                                     | 128  | 4     | 0.000/0.000/0.000 | 0.999 (1.000)                                     | 0.999 (1.000)                                     |
| GO:0051716 | cellular response to stimulus                              | 541  | 61    | 0.000/0.000/0.000 | 0.066 (0.302)                                     | 0.019 (0.161)                                     |
| GO:0051726 | regulation of cell cycle                                   | 166  | 4     | 0.000/0.000/0.000 | 1.000 (1.000)                                     | 0.968 (1.000)                                     |
| GO:0051783 | regulation of nuclear division                             | 32   | 1     | 0.000/0.000/0.000 | 0.958 (1.000)                                     | 0.338 (0.890)                                     |
| GO:0051784 | negative regulation of nuclear division                    | 20   | 1     | 0.000/0.000/0.000 | 0.861 (1.000)                                     | 0.250 (0.766)                                     |
| GO:0051789 | response to protein stimulus                               | 32   | 2     | 0.000/0.000/0.000 | 0.816 (1.000)                                     | 0.627 (1.000)                                     |
| GO:0055080 | cation homeostasis                                         | 106  | 10    | 0.000/0.000/0.000 | 0.541 (0.939)                                     | 0.101 (0.499)                                     |
| GO:0055082 | cellular chemical homeostasis                              | 116  | 11    | 0.000/0.000/0.000 | 0.531 (0.931)                                     | 0.541 (1.000)                                     |
| GO:0055085 | transmembrane transport                                    | 237  | 43    | 0.000/0.000/0.000 | $1.27 \times 10^{-5}$ ()                          | $1.32 \times 10^{-6}$ ( $5.49 \times 10^{-5}$ )   |

Continued on Next Page...

Table 1 – Continued

| GO ID      | Name                                                         | Pop  | Study | MGSA              | TfT                                               | PCu                                               |
|------------|--------------------------------------------------------------|------|-------|-------------------|---------------------------------------------------|---------------------------------------------------|
| GO:0055086 | nucleobase, nucleoside and nucleotide metabolic process      | 222  | 55    | 0.000/0.000/0.000 | $4.36 \times 10^{-12}$ ( $1.69 \times 10^{-10}$ ) | $5.54 \times 10^{-24}$ ( $2.15 \times 10^{-21}$ ) |
| GO:0060255 | regulation of macromolecule metabolic process                | 942  | 48    | 0.000/0.000/0.000 | 1.000 (1.000)                                     | 0.995 (1.000)                                     |
| GO:0065002 | intracellular protein transmembrane transport                | 91   | 4     | 0.000/0.000/0.000 | 0.977 (1.000)                                     | 0.996 (1.000)                                     |
| GO:0065003 | macromolecular complex assembly                              | 366  | 15    | 0.000/0.000/0.000 | 1.000 (1.000)                                     | 0.346 (0.893)                                     |
| GO:0065004 | protein-DNA complex assembly                                 | 69   | 1     | 0.000/0.000/0.000 | 0.999 (1.000)                                     | 0.867 (1.000)                                     |
| GO:0065007 | biological regulation                                        | 1669 | 95    | 0.000/0.000/0.000 | 1.000 (1.000)                                     | 1.000 (1.000)                                     |
| GO:0065008 | regulation of biological quality                             | 369  | 23    | 0.000/0.000/0.000 | 0.990 (1.000)                                     | 0.345 (0.893)                                     |
| GO:0065009 | regulation of molecular function                             | 132  | 11    | 0.000/0.000/0.000 | 0.705 (1.000)                                     | 0.124 (0.562)                                     |
| GO:0070085 | glycosylation                                                | 69   | 3     | 0.000/0.000/0.000 | 0.964 (1.000)                                     | 1.000 (1.000)                                     |
| GO:0070271 | protein complex biogenesis                                   | 190  | 13    | 0.000/0.000/0.000 | 0.916 (1.000)                                     | 0.018 (0.158)                                     |
| GO:0070585 | protein localization in mitochondrion                        | 51   | 2     | 0.000/0.000/0.000 | 0.959 (1.000)                                     | 0.550 (1.000)                                     |
| GO:0070646 | protein modification by small protein removal                | 28   | 1     | 0.000/0.000/0.000 | 0.937 (1.000)                                     | 0.511 (0.976)                                     |
| GO:0070647 | protein modification by small protein conjugation or removal | 133  | 3     | 0.000/0.000/0.000 | 1.000 (1.000)                                     | 0.871 (1.000)                                     |
| GO:0070727 | cellular macromolecule localization                          | 371  | 12    | 0.000/0.000/0.000 | 1.000 (1.000)                                     | 0.752 (1.000)                                     |
| GO:0070783 | growth of unicellular organism as a thread of attached cells | 79   | 3     | 0.000/0.000/0.000 | 0.983 (1.000)                                     | 1.000 (1.000)                                     |
| GO:0070882 | cell wall organization or biogenesis                         | 245  | 20    | 0.000/0.000/0.000 | 0.779 (1.000)                                     | 0.640 (1.000)                                     |
| GO:0070887 | cellular response to chemical stimulus                       | 54   | 6     | 0.000/0.000/0.000 | 0.395 (0.754)                                     | 0.549 (1.000)                                     |
| GO:0070972 | protein localization in endoplasmic reticulum                | 27   | 4     | 0.000/0.000/0.000 | 0.243 (0.594)                                     | 0.004 (0.048)                                     |
| GO:0080090 | regulation of primary metabolic process                      | 954  | 51    | 0.000/0.000/0.000 | 1.000 (1.000)                                     | 1.000 (1.000)                                     |
| GO:0090066 | regulation of anatomical structure size                      | 118  | 1     | 0.000/0.000/0.000 | 1.000 (1.000)                                     | 1.000 (1.000)                                     |

**Table S1:** Analysis of expression data from fermentative and respiratory respiration in yeast. A study set consisting of 488 differentially regulated and annotated genes from a population of 5206 annotated yeast genes was analyzed. The columns **GO ID** and **Name** identify the GO term being analyzed. The column **Pop** shows that number of genes in the population annotated to the term, and the column **Study** shows the number of genes in the study set. The column **MGSA** shows the 5<sup>th</sup> percentile, the median, and the 95<sup>th</sup> percentile of the posterior probability value for the term in question being active (calculated in 20 independent MCMC runs). The column **TfT** shows the corresponding Term-for-Term (exact Fischer test) *P*-value (The corresponding False Discovery Rate [FDR] is shown in parentheses). The column **PCu** shows the parent-child-union *P*-value (the corresponding FDR is shown in parentheses).
